# Supplementary material for: Redox regulation of KV7 channels through EF3 hand of calmodulin
Source: eLife. 2023 Feb 20;12:e81961. doi: 10.7554/eLife.81961 (PMC9988260; doi:10.7554/eLife.81961)
Supplement: Figure 1—figure supplement 2—source data 1. [file elife-81961-fig1-figsupp2-data1.xlsx]

## Sheet: si Figure 2A
H2O2 response
	H2O2 current normalized to baseline (I/I0)			H2O2 (150 µM)	Units: I/I0
Cell	Kcnq4WT CaMWT	Kcnq4CCC/AAA CaMWT	Kcnq4CCC/AAA CaM1234	Kcnq4WT CaM1234
1	1.8172	1.31725	1.00388	0.961819
2	1.50552	0.952279	1.05637	1.35154
3	1.67977	1.00917	0.990667	1.03913
4	2.44503	0.971058	0.950466	1.24019
5	2.14663	1.23383	0.954724	1.16147
6	1.44976	1.0065	0.988934	1.22594
7	1.19527	1.02787	0.961385	1.01346
8	1.57366	0.93293	1.20615	0.994177
9	1.75616	1.24634	1.01434	1.06622
10	1.85511	1.09742	0.967128	1.18449
11	1.55447	1.0766		1.08216
12	1.55238			1.33487
13				1.00814
Average	1.71091	1.0792	1.0094	1.12797
Standard deviation	0.331471	0.130719	0.0762275	0.131047
Standard error	0.0956873	0.0394133	0.0241053	0.0363459

## Sheet: si Figure 2C
Current voltage relationship of KCNQ4 channels
		Kcnq4WT CaMWT		Kcnq4WT CaM1234		Kcnq4CCC/AAA CaMWT		Kcnq4CCC/AAA CaM1234
	Voltage (mV)	I/Imax	sem	I/Imax	sem	I/Imax	sem	I/Imax	sem
	-80	-0.00662	0.040569	-0.07321	0.017369	-0.03817	0.012467	-0.04151	0.011457
	-70	0.021314	0.01204	0.012602	0.003359	-0.00303	0.002655	-0.00603	0.003964
	-60	0.162204	0.045072	0.221596	0.057745	0.112047	0.027647	0.266377	0.049778
	-50	0.360683	0.083486	0.488334	0.11359	0.275989	0.061681	0.486876	0.092457
	-40	0.549197	0.134713	0.721117	0.154249	0.445411	0.092725	0.661623	0.130691
	-30	0.695411	0.151126	0.867793	0.180776	0.601579	0.116853	0.795114	0.15779
	-20	0.801617	0.155904	0.959852	0.196902	0.726385	0.132696	0.890456	0.178122
	-10	0.931563	0.185411	0.998045	0.223331	0.834033	0.148298	0.95808	0.188544
	0	0.966702	0.183044	1	0.234948	0.901483	0.160634	0.978773	0.208037
	10	1	0.185303	0.972742	0.252679	0.956353	0.167667	0.989017	0.214465
	20	0.97435	0.17808	0.927967	0.275053	1	0.178779	1	0.218647
