# Supplementary material for: Redox regulation of KV7 channels through EF3 hand of calmodulin
Source: eLife. 2023 Feb 20;12:e81961. doi: 10.7554/eLife.81961 (PMC9988260; doi:10.7554/eLife.81961)
Supplement: Figure 1—source data 1. [file elife-81961-fig1-data1.xlsx]

## Sheet: Figure 1A
H2O2 response
	H2O2 current normalized to baseline (I/I0)				H2O2 (150 µM)		Units: I/I0
Cell	NoCaM	CaMWT	CaM12	CaM124	CaM3	CaM34	CaM1234
1	1.43095	1.8172	1.45989	1.40604	0.986183	0.987037	0.961819
2	1.92921	1.50552	1.75057	1.68357	0.984226	1.00754	1.35154
3	1.7314	1.67977	1.3525	1.24004	1.17135	0.931799	1.03913
4	1.49465	2.44503	2.01627	1.32048	1.13595	1.13534	1.24019
5	1.69568	2.14663	1.41321	1.6993	1.25476	1.14946	1.16147
6	1.97099	1.44976	2.30148	1.35207	1.28639	0.96324	1.22594
7		1.19527	1.34809	1.42028	1.02651	1.00123	1.01346
8		1.57366					0.994177
9		1.75616					1.06622
10		1.85511					1.18449
11		1.55447					1.08216
12		1.55238					1.33487
13							1.00814
Average	1.70881	1.71091	1.66315	1.44597	1.12077	1.02509	1.12797
Standard deviation	0.219574	0.331471	0.374023	0.177883	0.125043	0.0841404	0.131047
Standard error	0.0896407	0.0956873	0.141367	0.0672336	0.0472619	0.0318021	0.0363459

## Sheet: Figure 1B
	Current density of cells
		Baseline current density of cells before H2O2 application						Units: pA/pF
	Cell	NoCaM	CaMWT	CaM12	CaM124	CaM3	CaM34	CaM1234
	1	24.7194	2.37031	9.89081	13.942	14.1014	12.8988	20.573
	2	13.462	19.7615	10.7666	10.7681	25.5103	29.1333	18.1303
	3	22.4869	2.84549	11.7433	15.2674	30.8248	16.6789	15.9965
	4	13.4494	8.11649	10.6535	14.6214	23.4232	22.1044	9.14524
	5	21.7653	1.02514	12.4359	18.9724	14.7557	21.4643	12.4103
	6	19.0914	18.661	4.41287	13.6178	11.5605	30.2653	6.33196
	7		12.8195	9.18509	20.012	21.7044	16.3205	21.705
	8		7.35582					26.4709
	9		6.72779					15.3076
	10		9.57081					17.2665
	11		4.85637					20.6552
	12		14.9481					18.7862
	13							21.6132
	Average	19.1624	9.0882	9.86971	15.3144	20.2686	21.2665	17.2609
	Standard deviation	4.77171	6.25657	2.63819	3.19797	7.01402	6.57182	5.50256
	Standard error	1.94804	1.80612	0.997142	1.20872	2.65105	2.48392	1.52613

## Sheet: Figure 1D
	KCNQ4 - CaM3 transfected cells still respond to retigabine
		H2O2 current normalized to baseline (I/I0)				H2O2 (300 µM) Retigabine (10 µM)	Units: I/I0
	Cell	H2O2	Retigabine
	1	1.14148	1.73531
	2	1.26095	2.12358
	3	1.36481	2.68674
	4	0.816266	1.85528
	5	1.06477	2.07185
	6	1.06489	1.57485
	7	0.773519	1.62908
	8	1.2904	1.68695
	Average	1.09714	1.92045
	Standard deviation	0.214977	0.368156
	Standard error	0.076006	0.130163

## Sheet: Figure 1E
	Effect of BAPTA on H2O2 response
		H2O2 current (I/I0)		H2O2 (300 µM)	Units: I/I0
	Cell	Vehicle	BAPTA-AM
	1	2.7862	0.986779
	2	2.33568	1.00263
	3	2.43037	1.11335
	4	2.53828	1.00778
	5		1.07134
	6		1.32376
	7		0.970645
	8		1.37723
	9		1.1865
	Average	2.52263	1.11556
	Standard deviation	0.194228	0.150319
	Standard error	0.0971142	0.0501063
