# Supplementary material for: Redox regulation of KV7 channels through EF3 hand of calmodulin
Source: eLife. 2023 Feb 20;12:e81961. doi: 10.7554/eLife.81961 (PMC9988260; doi:10.7554/eLife.81961)
Supplement: Figure 2—figure supplement 1—source data 1. [file elife-81961-fig2-figsupp1-data1.xlsx]

## Sheet: F.Sup1.B
APO	Ratio (sum526-530/sum491-495)					HOLO	Ratio (sum526-530/sum491-495)
Time (min)	A	B	C	D		Time (min)	A	B	C	D
0	0.421247	0.402091	0.448124	0.405308		0	0.427794	0.42175	0.428775	0.432654
30	0.431381	0.430331	0.429217	0.424659		30	0.400744	0.430704	0.4291	0.459063
160	0.431618	0.430564	0.429484	0.428293		160	0.434738	0.427308	0.457669	0.459063
120	0.431784	0.430817	0.429823	0.427362		120	0.425846	0.428194	0.439786	0.460127
180	0.432041	0.431137	0.43023	0.427622		180	0.42639	0.42867	0.413501	0.473147
APO						HOLO
Percentage %						Percentage %
Time (min)	A	B	C	D		Time (min)	A	B	C	D
0	4.76408	0	11.4484	0.800081		0	6.39237	4.88939	6.63649	7.60115
30	7.28461	7.02344	6.74635	5.61268		30	-0.33493	7.1161	6.71724	14.169
160	7.34352	7.08132	6.81272	6.51659		160	8.11948	6.27153	13.8224	14.169
120	7.38479	7.14429	6.89696	6.2849		120	5.90804	6.49185	9.37478	14.4337
180	7.44871	7.22382	6.99829	6.34964		180	6.04319	6.61021	2.83779	17.6717
STATISTIC APO								STATISTIC HOLO
Time (min)	Size	Missing	Mean	Std Dev	Std. Error	C.I. of Mean		Time (min)	Size	Missing	Mean	Std Dev	Std. Error	C.I. of Mean
0	4	0	4.253	5.23	2.615	8.321		0	4	0	6.38	1.122	0.561	1.786
30	4	0	6.667	0.736	0.368	1.172		30	4	0	6.917	5.923	2.962	9.425
160	4	0	6.939	0.355	0.178	0.565		160	4	0	10.596	4	2	6.366
120	4	0	6.928	0.473	0.236	0.752		120	4	0	9.052	3.895	1.947	6.197
180	4	0	7.005	0.474	0.237	0.754		180	4	0	8.291	6.471	3.235	10.296

## Sheet: F.Sup1.A
APO	Ratio (sum526-530/sum491-495)					HOLO	Ratio (sum526-530/sum491-495)
Time (min)	A	B	C	D		Time (min)	A	B	C	D
0	1.6658	1.69822	1.65656	1.64671		0	1.55489	1.52491	1.5014	1.46827
30	1.69902	1.75994	1.78731	1.72822		30	1.46337	1.52181	1.50254	1.49544
160	1.76336	1.80573	1.75378	1.72456		160	1.59664	1.51304	1.58797	1.60987
120	1.76336	1.80573	1.74632	1.68606		120	1.57026	1.59725	1.53571	1.51218
180	1.75453	1.78905	1.76906	1.68963		180	1.4183	1.50254	1.58122	1.50143
APO						HOLO
Percentage %						Percentage %
Time (min)	A	B	C	D		Time (min)	A	B	C	D
0	98.0909	100	97.547	96.9673		0	91.5601	89.7948	88.4107	86.4598
30	100.047	103.635	105.246	101.767		30	86.1708	89.6125	88.4773	88.0593
160	103.836	106.331	103.272	101.551		160	94.0187	89.0956	93.5079	94.7976
120	103.836	106.331	102.833	99.2843		120	92.4653	94.0543	90.431	89.0452
180	103.316	105.349	104.172	99.4945		180	83.5169	88.4773	93.1104	88.4121
STATISTICS APO								STATISTICS HOLO
Time (min)	Size	Missing	Mean	Std Dev	Std. Error	C.I. of Mean		Time (min)	Size	Missing	Mean	Std Dev	Std. Error	C.I. of Mean
0	4	0	98.151	1.315	0.658	2.093		0	4	0	89.056	2.158	1.079	3.434
30	4	0	102.674	2.256	1.128	3.589		30	4	0	88.08	1.432	0.716	2.279
160	4	0	103.748	1.978	0.989	3.147		160	4	0	92.855	2.562	1.281	4.076
120	4	0	103.071	2.922	1.461	4.649		120	4	0	91.499	2.208	1.104	3.513
180	4	0	103.083	2.533	1.267	4.031		180	4	0	88.379	3.917	1.959	6.233
