# Supplementary material for: Redox regulation of KV7 channels through EF3 hand of calmodulin
Source: eLife. 2023 Feb 20;12:e81961. doi: 10.7554/eLife.81961 (PMC9988260; doi:10.7554/eLife.81961)
Supplement: Figure 2—figure supplement 2—source data 1. [file elife-81961-fig2-figsupp2-data1.xlsx]

## Sheet: EFFICIENCY
KCNQ1
Ratio= sum526-530nm/sum491-495nm)									EFFCIENCY	42.49*(LN(RATIO))+21.297								Difference Apo-Holo
CaM WT			CaM 124			CaM 3			CaM WT			CaM 124			CaM 3			CaM WT	CaM124	CaM3
EGTA	Ca2+		EGTA	Ca2+		EGTA	Ca2+		EGTA	Ca2+		EGTA	Ca2+		EGTA	Ca2+		13.201	12.3508	3.85918
1.5922	1.2601		1.585	1.5005		1.6064	1.3134		42.0958	28.8949		42.0203	29.6695		42.0203	38.1611		13.1505	11.356	4.31508
1.6227	1.2675		1.5742	1.4466		1.6189	1.3383		41.3179	28.1674		41.3868	30.0308		42.1089	37.7938		13.7703	11.1602	4.02423
1.5781	1.3032		1.5922	1.4309		1.6013	1.3378		41.5928	27.8226		40.8994	29.7392		42.5466	38.5224		13.2696	11.59	2.69205
1.6187	1.348		1.5732	1.4332		1.6127	1.3479		42.3736	29.104		41.2595	29.6695		41.1691	38.477		12.3298	12.8338	2.34212
1.5864	1.3435		1.5874	1.4921		1.6201	1.3656		41.3205	28.9907		41.9236	29.0898		40.9155	38.5733		13.5087	13.1995	4.15397
1.6124	1.2922		1.5901	1.4345		1.5984	1.3514		42.1219	28.6132		42.1973	28.9978		41.8005	37.6466
KCNQ3
Ratio= sum526-530nm/sum491-495nm)									EFFCIENCY	42.49*(LN(RATIO))+21.297
CaM WT			CaM 124			CaM 3			CaM WT			CaM 124			CaM 3			Difference Apo-Holo
EGTA	Ca2+		EGTA	Ca2+		EGTA	Ca2+		EGTA	Ca2+		EGTA	Ca2+		EGTA	Ca2+		CaM WT	CaM124	CaM3
1.64318	1.20847		1.64005	1.21466		1.6326	1.47198		42.3989	29.3428		42.3178	29.5597		42.1246	37.7239		13.0561	12.7581	4.40064
1.64682	1.20986		1.62972	1.21064		1.61944	1.46129		42.4931	29.3916		42.0494	29.4189		41.7805	37.4144		13.1015	12.6305	4.36614
1.65147	1.21189		1.6381	1.21338		1.62798	1.46756		42.6128	29.4629		42.2674	29.5151		42.004	37.5961		13.1499	12.7522	4.40791
1.64237	1.20783		1.62737	1.20968		1.61553	1.45744		42.378	29.3203		41.988	29.3853		41.6778	37.3023		13.0577	12.6028	4.37548
1.64624	1.21008		1.63455	1.21298		1.62343	1.46477		42.4779	29.3992		42.1751	29.5011		41.8851	37.5154		13.0788	12.674	4.36963
1.63689	1.20636		1.62532	1.20888		1.61065	1.45356		42.2359	29.2683		41.9347	29.3571		41.5494	37.1889		12.9676	12.5776	4.36045
1.64195	1.20822		1.63259	1.2118		1.60606	1.4501		42.3671	29.334		42.1242	29.4595		41.4281	37.0878		13.0331	12.6647	4.34031
KCNQ4
Ratio= sum526-530nm/sum491-495nm)									EFFCIENCY	42.49*(LN(RATIO))+21.297
CaM WT			CaM 124			CaM 3			CaM WT			CaM 124			CaM 3			Difference Apo-Holo
EGTA	Ca2+		EGTA	Ca2+		EGTA	Ca2+		EGTA	Ca2+		EGTA	Ca2+		EGTA	Ca2+		CaM WT	CaM124	CaM3
1.57146	1.20258		1.54721	1.29755		1.48126	1.33917		40.5026	29.1351		39.842	32.3647		37.9909	33.7062		11.3676	7.47729	4.2847
1.56784	1.20059		1.51947	1.29769		1.58022	1.45365		40.4048	29.0647		39.0733	32.3693		40.739	37.1914		11.3401	6.70401	3.5476
1.56406	1.19945		1.55218	1.29884		1.63199	1.49801		40.3021	29.0242		39.9781	32.407		42.1087	38.4687		11.2779	7.57113	3.63996
1.56008	1.19817		1.52347	1.29906		1.54913	1.38015		40.1938	28.9789		39.1848	32.4142		39.8945	34.9868		11.2149	6.77064	4.90767
1.55626	1.19622		1.55627	1.30001		1.54913	1.38015		40.0898	28.9099		40.0901	32.4452		39.8945	34.9868		11.1799	7.64495	4.90767
1.55275	1.19518		1.52728	1.30035		1.49595	1.36236		39.9937	28.8729		39.2909	32.4562		38.4104	34.4358		11.1209	6.83467	3.97464
			1.56049	1.30113		1.57782	1.43479					40.205	32.4818		40.6743	36.6367			7.72322	4.03757
						1.59302	1.44221								41.0818	36.8557				4.22604
KCNQ5
Ratio= sum526-530nm/sum491-495nm)									EFFCIENCY	42.49*(LN(RATIO))+21.297
CaM WT			CaM 124			CaM 3			CaM WT			CaM 124			CaM 3			Difference Apo-Holo
EGTA	Ca2+		EGTA	Ca2+		EGTA	Ca2+		EGTA	Ca2+		EGTA	Ca2+		EGTA	Ca2+		CaM WT	CaM3	CaM124
1.5922	1.2601		1.585	1.5005		1.6064	1.3134		41.0598	31.1203		40.8672	38.5394		41.4371	32.8806		9.9395	2.32786	8.55649
1.6227	1.2675		1.5742	1.4466		1.6189	1.3383		41.866	31.3691		40.5767	36.985		41.7664	33.6786		10.4969	3.59173	8.08783
1.5781	1.3032		1.5922	1.4309		1.6013	1.3378		40.6819	32.5493		41.0598	36.5213		41.302	33.6627		8.13254	4.53849	7.63925
1.6187	1.348		1.5732	1.4332		1.6127	1.3479		41.7612	33.9854		40.5497	36.5896		41.6034	33.9823		7.77573	3.96016	7.62109
1.5864	1.3435		1.5874	1.4921		1.6201	1.3656		40.9047	33.8434		40.9315	38.3008		41.7979	34.5366		7.06138	2.63068	7.26129
1.6124	1.2922		1.5901	1.4345		1.5984	1.3514		41.5955	32.1891		41.0037	36.6281		41.2249	34.0925		9.40633	4.37564	7.13246

## Sheet: Q1
Ratio= sum526-530nm/sum491-495nm)
CaM WT			CaM 124			CaM 3
EGTA	Ca2+		EGTA	Ca2+		EGTA	Ca2+
1.6315	1.1958		1.6286	1.2178		1.6286	1.4872
1.6019	1.1755		1.6045	1.2282		1.632	1.4744
1.6123	1.166		1.5862	1.2198		1.6489	1.4999
1.6422	1.2017		1.5997	1.2178		1.5963	1.4983
1.602	1.1985		1.6249	1.2013		1.5868	1.5017
1.6325	1.1879		1.6354	1.1987		1.6202	1.4693
Normalized
CaM WT			CaM 124			CaM 3
EGTA	Ca2+		EGTA	Ca2+		EGTA	Ca2+
99.3484	72.817		99.1718	74.1566		99.1718	90.5614
97.546	71.5808		97.7043	74.7899		99.3789	89.782
98.1793	71.0023		96.5899	74.2784		100.408	91.3348
100	73.1762		97.412	74.1566		97.205	91.2374
97.5521	72.9814		98.9465	73.1519		96.6265	91.4444
99.4093	72.3359		99.5859	72.9935		98.6603	89.4714
Difference	Holo-Apo
CaM WT			CaM124			CaM3
26.7055			25.2241			8.6823
26.6184			23.4528			9.65686
27.681			23.0992			9.03633
26.8238			23.8732			6.1392
25.1873			26.0693			5.36299
27.2343			26.7029			9.31366
NORMALIZED DIFFERENCE (%)
26.7646			94.2442			32.4395
			87.6261			36.0807
			86.3051			33.7622
			89.1969			22.9377
			97.402			20.0376
			99.7695			34.7984

## Sheet: Q3
Ratio= sum526-530nm/sum491-495nm)
Ca2+ uM	CaM WT	CaM WT	CaM WT	CaM WT	CaM WT	CaM WT	CaM WT	Ca2+ uM	CaM 124	CaM 124	CaM 124	CaM 124	CaM 124	CaM 124	CaM 124	Ca2+ uM	CaM 3	CaM 3	CaM 3	CaM 3	CaM 3	CaM 3	CaM 3
0	1.64318	1.64682	1.65147	1.64237	1.64624	1.63689	1.64195	0	1.64005	1.62972	1.6381	1.62737	1.63455	1.62532	1.63259	0	1.6326	1.61944	1.62798	1.61553	1.62343	1.61065	1.60606
0.5	1.52016	1.52123	1.52465	1.51697	1.52044	1.51221	1.51664	0.5	1.50658	1.49767	1.50518	1.49541	1.50198	1.49354	1.50042	0.5	1.61752	1.60398	1.61332	1.5993	1.60909	1.59501	1.5902
1	1.39032	1.39373	1.3983	1.38871	1.39376	1.38441	1.3878	1	1.43303	1.42601	1.4313	1.4241	1.43005	1.42237	1.4276	1	1.61864	1.60381	1.61364	1.59935	1.60868	1.59449	1.58981
2	1.26972	1.27576	1.28244	1.27354	1.27644	1.2656	1.27173	2	1.38832	1.38221	1.38643	1.37997	1.38491	1.3784	1.38337	2	1.61451	1.59885	1.6084	1.59335	1.60481	1.5886	1.58342
4	1.2131	1.21485	1.21646	1.2125	1.21462	1.2108	1.21234	4	1.26972	1.26245	1.27106	1.25998	1.26799	1.2575	1.26428	4	1.57146	1.55919	1.56725	1.55525	1.56372	1.55137	1.54712
8	1.2113	1.21325	1.2145	1.21069	1.21222	1.209	1.21139	8	1.23922	1.23501	1.24141	1.23355	1.23959	1.23207	1.23726	8	1.52534	1.51396	1.5217	1.50964	1.51725	1.50595	1.50221
12	1.20986	1.21163	1.213	1.20924	1.21081	1.20741	1.21016	12	1.21804	1.21426	1.21737	1.21366	1.2167	1.21207	1.21505	12	1.48147	1.47101	1.47849	1.46814	1.47477	1.46452	1.46107
16	1.20946	1.21104	1.21299	1.20883	1.21095	1.20743	1.20976	16	1.21632	1.21219	1.21584	1.21199	1.21387	1.21079	1.21352	16	1.47613	1.46607	1.47288	1.46219	1.46928	1.4586	1.45497
20	1.20847	1.20986	1.21189	1.20783	1.21008	1.20636	1.20822	20	1.21466	1.21064	1.21338	1.20968	1.21298	1.20888	1.2118	20	1.47198	1.46129	1.46756	1.45744	1.46477	1.45356	1.4501
normalization (max=1)
Ca2+ uM	CaM WT	CaM WT	CaM WT	CaM WT	CaM WT	CaM WT	CaM WT		CaM 124	CaM 124	CaM 124	CaM 124	CaM 124	CaM 124	CaM 124		CaM 3	CaM 3	CaM 3	CaM 3	CaM 3	CaM 3	CaM 3
0	-0.00502366	-0.0028153	0	-0.00551181	-0.0031706	-0.00883111	-0.00576684		-0.00691934	-0.0131737	-0.00809801	-0.014597	-0.0102499	-0.0158341	-0.0114339		-0.0114253	-0.0193985	-0.0142268	-0.0217659	-0.0169823	-0.0247174	-0.0274978
0.5	-0.0795097	-0.0788647	-0.0767961	-0.0814435	-0.0793431	-0.0843235	-0.0816416		-0.0877376	-0.093132	-0.0885829	-0.094502	-0.090519	-0.0956313	-0.0914648		-0.0205617	-0.0287566	-0.0230992	-0.0315892	-0.0256641	-0.0341866	-0.0371018
1	-0.158136	-0.156068	-0.153302	-0.159108	-0.156047	-0.161712	-0.159661		-0.132269	-0.136523	-0.133319	-0.137678	-0.134078	-0.138727	-0.135559		-0.0198818	-0.0288617	-0.0229106	-0.0315585	-0.0259143	-0.0345052	-0.0373384
2	-0.231157	-0.227501	-0.223457	-0.228847	-0.227091	-0.233653	-0.22994		-0.159346	-0.163045	-0.16049	-0.1644	-0.161409	-0.16535	-0.162343		-0.022379	-0.0318612	-0.0260843	-0.0351934	-0.0282535	-0.0380679	-0.0412088
4	-0.265443	-0.264382	-0.263408	-0.265805	-0.264526	-0.266835	-0.265902		-0.231157	-0.235561	-0.230347	-0.237057	-0.232206	-0.238558	-0.234452		-0.0484506	-0.0558797	-0.0510005	-0.0582617	-0.0531344	-0.0606137	-0.0631886
8	-0.266533	-0.265352	-0.264599	-0.266905	-0.265973	-0.267927	-0.26648		-0.24963	-0.252175	-0.248303	-0.253062	-0.249405	-0.253956	-0.250813		-0.0763736	-0.0832656	-0.0785789	-0.0858795	-0.0812751	-0.088117	-0.0903788
12	-0.267405	-0.266331	-0.265502	-0.267783	-0.26683	-0.268887	-0.267226		-0.262453	-0.264743	-0.262856	-0.265106	-0.263265	-0.266067	-0.264262		-0.102942	-0.109271	-0.104743	-0.111013	-0.106998	-0.113205	-0.115293
16	-0.267647	-0.266691	-0.265508	-0.268029	-0.266746	-0.268875	-0.267468		-0.263493	-0.265997	-0.263787	-0.266118	-0.264978	-0.266844	-0.265189		-0.106174	-0.112264	-0.108141	-0.114612	-0.110323	-0.116789	-0.118988
20	-0.268246	-0.267405	-0.266174	-0.268633	-0.267274	-0.269527	-0.268397		-0.2645	-0.266933	-0.265272	-0.267514	-0.265515	-0.267999	-0.266232		-0.108687	-0.115158	-0.111365	-0.117488	-0.11305	-0.11984	-0.121933
%
Ca2+ uM	CaM WT	CaM WT	CaM WT	CaM WT	CaM WT	CaM WT	CaM WT		CaM 124	CaM 124	CaM 124	CaM 124	CaM 124	CaM 124	CaM 124		CaM 3	CaM 3	CaM 3	CaM 3	CaM 3	CaM 3	CaM 3
0	1.8684	1.04707	0	2.04995	1.17921	3.28446	2.1448		2.57344	4.89956	3.01181	5.42892	3.81214	5.889	4.2525		4.24931	7.21467	5.29122	8.09515	6.31605	9.1929	10.227
0.5	29.5712	29.3313	28.562	30.2905	29.5092	31.3616	30.3641		32.6314	34.6376	32.9457	35.1472	33.6658	35.5672	34.0176		7.6473	10.6951	8.59106	11.7486	9.54499	12.7147	13.7989
1	58.8139	58.0448	57.0162	59.1754	58.0371	60.1439	59.381		49.1934	50.7757	49.5841	51.2052	49.8664	51.5955	50.4172		7.39442	10.7342	8.52089	11.7372	9.63803	12.8331	13.8869
2	85.9717	84.6122	83.1081	85.1127	84.4594	86.9	85.519		59.2639	60.6396	59.6895	61.1434	60.0313	61.4971	60.3786		8.32321	11.8498	9.70125	13.0891	10.508	14.1582	15.3264
4	98.7235	98.3287	97.9667	98.8582	98.3823	99.2413	98.8943		85.9717	87.6097	85.6707	88.166	86.3621	88.7245	87.1972		18.0197	20.7828	18.9681	21.6687	19.7617	22.5434	23.5011
8	99.1287	98.6896	98.4094	99.2672	98.9207	99.6474	99.1093		92.8423	93.7889	92.3489	94.1188	92.7585	94.4513	93.2824		28.4048	30.9681	29.2251	31.9403	30.2278	32.7724	33.6137
12	99.4532	99.0539	98.7453	99.5938	99.2394	100.005	99.3866		97.6113	98.4633	97.7612	98.5981	97.9135	98.9556	98.2841		38.2862	40.64	38.956	41.2878	39.7947	42.1032	42.8798
16	99.5432	99.1878	98.7478	99.6853	99.208	100	99.4767		97.9981	98.9296	98.1074	98.9746	98.5504	99.2447	98.6288		39.4881	41.7531	40.2199	42.6264	41.0312	43.4361	44.254
20	99.7659	99.4532	98.9953	99.9099	99.4045	100.242	99.8223		98.3726	99.2777	98.6597	99.4936	98.7501	99.674	99.017		40.423	42.8295	41.4189	43.6961	42.0457	44.5707	45.3491
	CaM WT EGTA	CaM WT Ca	CaM124 EGTA	CaM124 Ca	CaM3 EGTA	CaM3 Ca
	1.8684	99.7659	2.57344	98.3726	4.24931	40.423
	1.04707	99.4532	4.89956	99.2777	7.21467	42.8295
	0	98.9953	3.01181	98.6597	5.29122	41.4189
	2.04995	99.9099	5.42892	99.4936	8.09515	43.6961
	1.17921	99.4045	3.81214	98.7501	6.31605	42.0457
	3.28446	100.242	5.889	99.674	9.1929	44.5707
	2.1448	99.8223	4.2525	99.017	10.227	45.3491
DIFFERENCE (HOLO-APO)
	CaM WT		CaM124		CaM3
	97.8975		95.7992		36.1736
	98.4061		94.3782		35.6148
	98.9953		95.6479		36.1277
	97.8599		94.0647		35.6009
	98.2253		94.9379		35.7297
	96.9579		93.785		35.3778
	97.6775		94.7645		35.1221
STATISTICS
Column	Size	Missing	Mean	Std Dev	Std. Error	C.I. of Mean
CaM WT	7	0	98.003	0.636	0.24	0.588
CaM124	7	0	94.768	0.762	0.288	0.704
CaM3	7	0	35.678	0.379	0.143	0.35

## Sheet: Q4
Ratio= sum526-530nm/sum491-495nm)
Free Ca2+	CaM WT	CaM WT	CaM WT	CaM WT	CaM WT	CaM WT		Free Ca2+ uM	CaM 124	CaM 124	CaM 124	CaM 124	CaM 124	CaM 124	CaM 124	Free Ca2+ uM	CaM 3	CaM 3	CaM 3	CaM 3	CaM 3	CaM 3	CaM 3	CaM 3
0	1.57146	1.56784	1.56406	1.56008	1.55626	1.55275		0	1.54721	1.51947	1.55218	1.52347	1.55627	1.52728	1.56049	0	1.48126	1.58022	1.63199	1.54913	1.54913	1.49595	1.57782	1.59302
0.5	1.52534	1.5221	1.51783	1.51475	1.51075	1.50718		0.5	1.49641	1.48018	1.50027	1.48361	1.50334	1.48694	1.50708	1	1.3658	1.41829	1.44123	1.43409	1.43409	1.38753	1.41624	1.43893
1	1.37863	1.37603	1.37338	1.37083	1.36841	1.36556		1	1.4784	1.47491	1.48175	1.47841	1.48548	1.48199	1.48813	2	1.36986	1.39485	1.40996	1.42084	1.42084	1.39088	1.39338	1.4081
2	1.27672	1.27528	1.2737	1.27171	1.27024	1.26829		2	1.38496	1.34087	1.38691	1.34227	1.38853	1.34394	1.38989	4	1.35456	1.42781	1.44412	1.41554	1.41554	1.37685	1.42571	1.44221
4	1.21481	1.21379	1.21213	1.21071	1.20988	1.2084		4	1.30451	1.30748	1.30591	1.30883	1.30747	1.31015	1.30842	8	1.34165	1.4369	1.48453	1.41595	1.41595	1.36451	1.43479	1.44221
8	1.21215	1.21092	1.20932	1.20868	1.20695	1.20598		8	1.29998	1.29769	1.30121	1.29906	1.30265	1.30035	1.30361	12	1.33917	1.45365	1.49801	1.38015	1.38015	1.36236	1.43479	1.44221
12	1.20886	1.2077	1.20637	1.2046	1.20363	1.20205		12	1.29755	1.29769	1.29884	1.29906	1.30001	1.30035	1.30113
16	1.20536	1.20351	1.20251	1.20108	1.19927	1.19832
20	1.20258	1.20059	1.19945	1.19817	1.19622	1.19518
normalization
Ca2+ uM	CaM WT	CaM WT	CaM WT	CaM WT	CaM WT	CaM WT	CaM WT	Free Ca2+ uM	CaM 124	CaM 124	CaM 124	CaM 124	CaM 124	CaM 124	CaM 124	Free Ca2+ uM	CaM 3	CaM 3	CaM 3	CaM 3	CaM 3	CaM 3	CaM 3	CaM 3
0	0	-0.00230062	-0.00470802	-0.00724177	-0.00966957	-0.0119051		0	-0.0154283	-0.0330806	-0.0122695	-0.0305389	-0.00966151	-0.0281153	-0.00698095	0	-0.0574004	0.00557905	0.0385223	-0.01421	-0.01421	-0.0480481	0.00404753	0.013723
0.5	-0.0293447	-0.0314084	-0.034129	-0.0360844	-0.0386337	-0.0409044		0.5	-0.0477594	-0.0580877	-0.0452979	-0.0559042	-0.0433496	-0.0537853	-0.0409649	1	-0.130872	-0.0974698	-0.0828723	-0.0874173	-0.0874173	-0.117044	-0.0987725	-0.0843339
1	-0.122706	-0.124363	-0.126049	-0.127672	-0.12921	-0.131024		1	-0.059216	-0.0614371	-0.0570877	-0.0592118	-0.0547138	-0.0569324	-0.0530269	2	-0.128286	-0.112386	-0.102768	-0.095846	-0.095846	-0.114909	-0.113323	-0.103952
2	-0.187556	-0.188475	-0.189476	-0.190743	-0.191678	-0.19292		2	-0.118677	-0.146733	-0.11744	-0.145841	-0.116409	-0.144782	-0.115542	4	-0.138021	-0.0914107	-0.0810331	-0.0992206	-0.0992206	-0.123836	-0.0927447	-0.0822497
4	-0.22695	-0.227605	-0.228661	-0.229561	-0.230088	-0.231032		4	-0.169875	-0.167986	-0.168984	-0.167125	-0.167991	-0.16628	-0.167383	8	-0.146238	-0.0856279	-0.0553158	-0.098956	-0.098956	-0.131691	-0.0869682	-0.0822497
8	-0.228646	-0.229428	-0.230449	-0.230857	-0.231952	-0.232575		8	-0.172757	-0.174213	-0.171975	-0.17334	-0.171056	-0.172521	-0.170447	12	-0.147817	-0.0749698	-0.0467398	-0.121741	-0.121741	-0.133058	-0.0869682	-0.0822497
12	-0.230741	-0.231476	-0.232323	-0.233451	-0.234065	-0.235072		12	-0.174302	-0.174213	-0.17348	-0.17334	-0.172736	-0.172521	-0.172024
16	-0.232969	-0.234146	-0.234777	-0.235692	-0.236844	-0.237446
20	-0.234736	-0.236003	-0.23673	-0.237543	-0.238781	-0.239444
%
Ca2+ uM	CaM WT	CaM WT	CaM WT	CaM WT	CaM WT	CaM WT	CaM WT	Free Ca2+ uM	CaM 124	CaM 124	CaM 124	CaM 124	CaM 124	CaM 124	CaM 124	Free Ca2+ uM	CaM 3	CaM 3	CaM 3	CaM 3	CaM 3	CaM 3	CaM 3	CaM 3
0	0	0.960818	1.96623	3.02441	4.03834	4.97199		0	6.44338	13.8156	5.12417	12.7541	4.03498	11.7419	2.91548	0	23.9723	-2.33	-16.0882	5.93458	5.93458	20.0665	-1.69039	-5.73121
0.5	12.2554	13.1172	14.2534	15.0701	16.1347	17.0831		0.5	19.946	24.2594	18.918	23.3475	18.1043	22.4626	17.1083	1	54.6568	40.7067	34.6103	36.5084	36.5084	48.8816	41.2507	35.2207
1	51.2462	51.9384	52.6422	53.3201	53.9626	54.7201		1	24.7306	25.6582	23.8418	24.7288	22.8504	23.7769	22.1458	2	53.5766	46.9363	42.9195	40.0285	40.0285	47.9898	47.3276	43.4137
2	78.3297	78.7134	79.1315	79.6606	80.0514	80.5698		2	49.5635	61.2806	49.047	60.9082	48.6165	60.4657	48.2543	4	57.6425	38.1762	33.8422	41.4379	41.4379	51.7181	38.7333	34.3503
4	94.7822	95.0554	95.4965	95.8725	96.0926	96.4866		4	70.9455	70.1566	70.5733	69.7969	70.1588	69.4444	69.9048	8	61.0738	35.7611	23.1018	41.3274	41.3274	54.9988	36.3209	34.3503
8	95.4902	95.8167	96.2434	96.4136	96.8712	97.131		8	72.1493	72.7574	71.8226	72.3926	71.4387	72.0507	71.1844	12	61.7334	31.3099	19.5201	50.8432	50.8432	55.5697	36.3209	34.3503
12	96.3652	96.6721	97.0258	97.4971	97.7534	98.1741		12	72.7944	72.7574	72.4512	72.3926	72.1406	72.0507	71.843
16	97.2956	97.7873	98.051	98.4328	98.9139	99.1653
20	98.0338	98.5629	98.8664	99.2061	99.723	100
	CaM WT EGTA	CaM WT Ca	CaM124 EGTA	CaM124 Ca	CaM3 EGTA	CaM3 Ca
	0	98.0338	6.44338	72.7944	23.9723	61.7334
	0.960818	98.5629	13.8156	72.7574	-2.33	31.3099
	1.96623	98.8664	5.12417	72.4512	-16.0882	19.5201
	3.02441	99.2061	12.7541	72.3926	5.93458	50.8432
	4.03834	99.723	4.03498	72.1406	5.93458	50.8432
	4.97199	100	11.7419	72.0507	20.0665	55.5697
			2.91548	71.843	-1.69039	36.3209
DIFFERENCE (HOLO-APO)					-5.73121	34.3503
	CaM WT		CaM124		CaM3
	98.0338		66.351		37.761
	97.6021		58.9418		33.6399
	96.9002		67.3271		35.6084
	96.1817		59.6385		44.9086
	95.6846		68.1056		44.9086
	95.028		60.3088		35.5032
			68.9275		38.0113
					40.0815
STATISTICS
Column	Size	Missing	Mean	Std Dev	Std. Error	C.I. of Mean
CaM WT	6	0	96.572	1.151	0.47	1.208
CaM 124	7	0	64.229	4.389	1.659	4.06
CaM 3	8	0	38.803	4.237	1.498	3.542
	1.06897
	1.57146
	1.52534
	1.37863
	1.27672
	1.21481
	1.21215
	1.20886
	1.20536
	1.20258
	1.56784
	1.5221								1.0668								1.0668
	1.37603								1.54721								1.48126
	1.27528								1.49641								1.3658
	1.21379								1.4784								1.36986
	1.21092								1.38496								1.35456
	1.2077								1.30451								1.34165
	1.20351								1.29998								1.33917
	1.20059								1.29755
																	1.0668
	1.56406								1.51947								1.48022
	1.51783								1.48018								1.41829
	1.37338								1.47491								1.39485
	1.2737								1.34087								1.42781
	1.21213								1.30748								1.4369
	1.20932								1.29769								1.45365
	1.20637
	1.20251								1.55218								1.0668
	1.19945								1.50027								1.43199
									1.48175								1.44123
	1.56008								1.38691								1.40996
	1.51475								1.30591								1.44412
	1.37083								1.30121								1.48453
	1.27171								1.29884								1.49801
	1.21071
	1.20868								1.52347								1.0668
	1.2046								1.48361								1.49127
	1.20108								1.47841								1.43409
	1.19817								1.34227								1.42084
									1.30883								1.41554
	1.55626								1.29906								1.41595
	1.51075																1.38015
	1.36841								1.55627
	1.27024								1.50334
	1.20988								1.48548
	1.20695								1.38853
	1.20363								1.30747
	1.19927								1.30265
	1.19622								1.30001
	1.55275								1.52728
	1.50718								1.48694
	1.36556								1.48199
	1.26829								1.34394
	1.2084								1.31015
	1.20598								1.30035
	1.20205
	1.19832								1.56049
	1.19518								1.50708
									1.48813
									1.38989
									1.30842
									1.30361
									1.30113
	1.06897
	1.87543
	1.7749
	2.21182
	2.08894
	1.06897
	1.53158
	1.32283
	1.06897
	1.57146
	1.52534
	1.37863
	1.27672
	1.21481
	1.21215
	1.20886
	1.20536
	1.20258
	1.56784
	1.5221								1.0668								1.0668
	1.37603								1.54721								1.48126
	1.27528								1.49641								1.3658
	1.21379								1.4784								1.36986
	1.21092								1.38496								1.35456
	1.2077								1.30451								1.34165
	1.20351								1.29998								1.33917
	1.20059								1.29755
																	1.0668
	1.56406								1.51947								1.48022
	1.51783								1.48018								1.41829
	1.37338								1.47491								1.39485
	1.2737								1.34087								1.42781
	1.21213								1.30748								1.4369
	1.20932								1.29769								1.45365
	1.20637
	1.20251								1.55218								1.0668
	1.19945								1.50027								1.43199
									1.48175								1.44123
	1.56008								1.38691								1.40996
	1.51475								1.30591								1.44412
	1.37083								1.30121								1.48453
	1.27171								1.29884								1.49801
	1.21071
	1.20868								1.52347								1.0668
	1.2046								1.48361								1.49127
	1.20108								1.47841								1.43409
	1.19817								1.34227								1.42084
									1.30883								1.41554
	1.55626								1.29906								1.41595
	1.51075																1.38015
	1.36841								1.55627
	1.27024								1.50334
	1.20988								1.48548
	1.20695								1.38853
	1.20363								1.30747
	1.19927								1.30265
	1.19622								1.30001
	1.55275								1.52728
	1.50718								1.48694
	1.36556								1.48199
	1.26829								1.34394
	1.2084								1.31015
	1.20598								1.30035
	1.20205
	1.19832								1.56049
	1.19518								1.50708
									1.48813
									1.38989
									1.30842
									1.30361
									1.30113
	1.06897
	1.87543
	1.7749
	2.21182
	2.08894
	1.06897
	1.53158
	1.32283
	1.06897
	1.57146
	1.52534
	1.37863
	1.27672
	1.21481
	1.21215
	1.20886
	1.20536
	1.20258
	1.56784
	1.5221								1.0668								1.0668
	1.37603								1.54721								1.48126
	1.27528								1.49641								1.3658
	1.21379								1.4784								1.36986
	1.21092								1.38496								1.35456
	1.2077								1.30451								1.34165
	1.20351								1.29998								1.33917
	1.20059								1.29755
																	1.0668
	1.56406								1.51947								1.48022
	1.51783								1.48018								1.41829
	1.37338								1.47491								1.39485
	1.2737								1.34087								1.42781
	1.21213								1.30748								1.4369
	1.20932								1.29769								1.45365
	1.20637
	1.20251								1.55218								1.0668
	1.19945								1.50027								1.43199
									1.48175								1.44123
	1.56008								1.38691								1.40996
	1.51475								1.30591								1.44412
	1.37083								1.30121								1.48453
	1.27171								1.29884								1.49801
	1.21071
	1.20868								1.52347								1.0668
	1.2046								1.48361								1.49127
	1.20108								1.47841								1.43409
	1.19817								1.34227								1.42084
									1.30883								1.41554
	1.55626								1.29906								1.41595
	1.51075																1.38015
	1.36841								1.55627
	1.27024								1.50334
	1.20988								1.48548
	1.20695								1.38853
	1.20363								1.30747
	1.19927								1.30265
	1.19622								1.30001
	1.55275								1.52728
	1.50718								1.48694
	1.36556								1.48199
	1.26829								1.34394
	1.2084								1.31015
	1.20598								1.30035
	1.20205
	1.19832								1.56049
	1.19518								1.50708
									1.48813
									1.38989
									1.30842
									1.30361
									1.30113
	1.06897
	1.87543
	1.7749
	2.21182
	2.08894
	1.06897
	1.53158
	1.32283
	1.06897
	1.57146
	1.52534
	1.37863
	1.27672
	1.21481
	1.21215
	1.20886
	1.20536
	1.20258
	1.56784
	1.5221								1.0668								1.0668
	1.37603								1.54721								1.48126
	1.27528								1.49641								1.3658
	1.21379								1.4784								1.36986
	1.21092								1.38496								1.35456
	1.2077								1.30451								1.34165
	1.20351								1.29998								1.33917
	1.20059								1.29755
																	1.0668
	1.56406								1.51947								1.48022
	1.51783								1.48018								1.41829
	1.37338								1.47491								1.39485
	1.2737								1.34087								1.42781
	1.21213								1.30748								1.4369
	1.20932								1.29769								1.45365
	1.20637
	1.20251								1.55218								1.0668
	1.19945								1.50027								1.43199
									1.48175								1.44123
	1.56008								1.38691								1.40996
	1.51475								1.30591								1.44412
	1.37083								1.30121								1.48453
	1.27171								1.29884								1.49801
	1.21071
	1.20868								1.52347								1.0668
	1.2046								1.48361								1.49127
	1.20108								1.47841								1.43409
	1.19817								1.34227								1.42084
									1.30883								1.41554
	1.55626								1.29906								1.41595
	1.51075																1.38015
	1.36841								1.55627
	1.27024								1.50334
	1.20988								1.48548
	1.20695								1.38853
	1.20363								1.30747
	1.19927								1.30265
	1.19622								1.30001
	1.55275								1.52728
	1.50718								1.48694
	1.36556								1.48199
	1.26829								1.34394
	1.2084								1.31015
	1.20598								1.30035
	1.20205
	1.19832								1.56049
	1.19518								1.50708
									1.48813
									1.38989
									1.30842
									1.30361
									1.30113
	1.06897
	1.87543
	1.7749
	2.21182
	2.08894
	1.06897
	1.53158
	1.32283
	1.06897
	1.57146
	1.52534
	1.37863
	1.27672
	1.21481
	1.21215
	1.20886
	1.20536
	1.20258
	1.56784
	1.5221								1.0668								1.0668
	1.37603								1.54721								1.48126
	1.27528								1.49641								1.3658
	1.21379								1.4784								1.36986
	1.21092								1.38496								1.35456
	1.2077								1.30451								1.34165
	1.20351								1.29998								1.33917
	1.20059								1.29755
																	1.0668
	1.56406								1.51947								1.48022
	1.51783								1.48018								1.41829
	1.37338								1.47491								1.39485
	1.2737								1.34087								1.42781
	1.21213								1.30748								1.4369
	1.20932								1.29769								1.45365
	1.20637
	1.20251								1.55218								1.0668
	1.19945								1.50027								1.43199
									1.48175								1.44123
	1.56008								1.38691								1.40996
	1.51475								1.30591								1.44412
	1.37083								1.30121								1.48453
	1.27171								1.29884								1.49801
	1.21071
	1.20868								1.52347								1.0668
	1.2046								1.48361								1.49127
	1.20108								1.47841								1.43409
	1.19817								1.34227								1.42084
									1.30883								1.41554
	1.55626								1.29906								1.41595
	1.51075																1.38015
	1.36841								1.55627
	1.27024								1.50334
	1.20988								1.48548
	1.20695								1.38853
	1.20363								1.30747
	1.19927								1.30265
	1.19622								1.30001
	1.55275								1.52728
	1.50718								1.48694
	1.36556								1.48199
	1.26829								1.34394
	1.2084								1.31015
	1.20598								1.30035
	1.20205
	1.19832								1.56049
	1.19518								1.50708
									1.48813
									1.38989
									1.30842
									1.30361
									1.30113
	1.06897
	1.87543
	1.7749
	2.21182
	2.08894
	1.06897
	1.53158
	1.32283
	1.06897
	1.57146
	1.52534
	1.37863
	1.27672
	1.21481
	1.21215
	1.20886
	1.20536
	1.20258
	1.56784
	1.5221								1.0668								1.0668
	1.37603								1.54721								1.48126
	1.27528								1.49641								1.3658
	1.21379								1.4784								1.36986
	1.21092								1.38496								1.35456
	1.2077								1.30451								1.34165
	1.20351								1.29998								1.33917
	1.20059								1.29755
																	1.0668
	1.56406								1.51947								1.48022
	1.51783								1.48018								1.41829
	1.37338								1.47491								1.39485
	1.2737								1.34087								1.42781
	1.21213								1.30748								1.4369
	1.20932								1.29769								1.45365
	1.20637
	1.20251								1.55218								1.0668
	1.19945								1.50027								1.43199
									1.48175								1.44123
	1.56008								1.38691								1.40996
	1.51475								1.30591								1.44412
	1.37083								1.30121								1.48453
	1.27171								1.29884								1.49801
	1.21071
	1.20868								1.52347								1.0668
	1.2046								1.48361								1.49127
	1.20108								1.47841								1.43409
	1.19817								1.34227								1.42084
									1.30883								1.41554
	1.55626								1.29906								1.41595
	1.51075																1.38015
	1.36841								1.55627
	1.27024								1.50334
	1.20988								1.48548
	1.20695								1.38853
	1.20363								1.30747
	1.19927								1.30265
	1.19622								1.30001
	1.55275								1.52728
	1.50718								1.48694
	1.36556								1.48199
	1.26829								1.34394
	1.2084								1.31015
	1.20598								1.30035
	1.20205
	1.19832								1.56049
	1.19518								1.50708
									1.48813
									1.38989
									1.30842
									1.30361
									1.30113
	1.06897
	1.87543
	1.7749
	2.21182
	2.08894
	1.06897
	1.53158
	1.32283
	1.06897
	1.57146
	1.52534
	1.37863
	1.27672
	1.21481
	1.21215
	1.20886
	1.20536
	1.20258
	1.56784
	1.5221								1.0668								1.0668
	1.37603								1.54721								1.48126
	1.27528								1.49641								1.3658
	1.21379								1.4784								1.36986
	1.21092								1.38496								1.35456
	1.2077								1.30451								1.34165
	1.20351								1.29998								1.33917
	1.20059								1.29755
																	1.0668
	1.56406								1.51947								1.48022
	1.51783								1.48018								1.41829
	1.37338								1.47491								1.39485
	1.2737								1.34087								1.42781
	1.21213								1.30748								1.4369
	1.20932								1.29769								1.45365
	1.20637
	1.20251								1.55218								1.0668
	1.19945								1.50027								1.43199
									1.48175								1.44123
	1.56008								1.38691								1.40996
	1.51475								1.30591								1.44412
	1.37083								1.30121								1.48453
	1.27171								1.29884								1.49801
	1.21071
	1.20868								1.52347								1.0668
	1.2046								1.48361								1.49127
	1.20108								1.47841								1.43409
	1.19817								1.34227								1.42084
									1.30883								1.41554
	1.55626								1.29906								1.41595
	1.51075																1.38015
	1.36841								1.55627
	1.27024								1.50334
	1.20988								1.48548
	1.20695								1.38853
	1.20363								1.30747
	1.19927								1.30265
	1.19622								1.30001
	1.55275								1.52728
	1.50718								1.48694
	1.36556								1.48199
	1.26829								1.34394
	1.2084								1.31015
	1.20598								1.30035
	1.20205
	1.19832								1.56049
	1.19518								1.50708
									1.48813
									1.38989
									1.30842
									1.30361
									1.30113
	1.06897
	1.87543
	1.7749
	2.21182
	2.08894
	1.06897
	1.53158
	1.32283
	1.06897
	1.57146
	1.52534
	1.37863
	1.27672
	1.21481
	1.21215
	1.20886
	1.20536
	1.20258
	1.56784
	1.5221								1.0668								1.0668
	1.37603								1.54721								1.48126
	1.27528								1.49641								1.3658
	1.21379								1.4784								1.36986
	1.21092								1.38496								1.35456
	1.2077								1.30451								1.34165
	1.20351								1.29998								1.33917
	1.20059								1.29755
																	1.0668
	1.56406								1.51947								1.48022
	1.51783								1.48018								1.41829
	1.37338								1.47491								1.39485
	1.2737								1.34087								1.42781
	1.21213								1.30748								1.4369
	1.20932								1.29769								1.45365
	1.20637
	1.20251								1.55218								1.0668
	1.19945								1.50027								1.43199
									1.48175								1.44123
	1.56008								1.38691								1.40996
	1.51475								1.30591								1.44412
	1.37083								1.30121								1.48453
	1.27171								1.29884								1.49801
	1.21071
	1.20868								1.52347								1.0668
	1.2046								1.48361								1.49127
	1.20108								1.47841								1.43409
	1.19817								1.34227								1.42084
									1.30883								1.41554
	1.55626								1.29906								1.41595
	1.51075																1.38015
	1.36841								1.55627
	1.27024								1.50334
	1.20988								1.48548
	1.20695								1.38853
	1.20363								1.30747
	1.19927								1.30265
	1.19622								1.30001
	1.55275								1.52728
	1.50718								1.48694
	1.36556								1.48199
	1.26829								1.34394
	1.2084								1.31015
	1.20598								1.30035
	1.20205
	1.19832								1.56049
	1.19518								1.50708
									1.48813
									1.38989
									1.30842
									1.30361
									1.30113
	1.06897
	1.87543
	1.7749
	2.21182
	2.08894
	1.06897
	1.53158
	1.32283
	1.06897
	1.57146
	1.52534
	1.37863
	1.27672
	1.21481
	1.21215
	1.20886
	1.20536
	1.20258
	1.56784
	1.5221								1.0668								1.0668
	1.37603								1.54721								1.48126
	1.27528								1.49641								1.3658
	1.21379								1.4784								1.36986
	1.21092								1.38496								1.35456
	1.2077								1.30451								1.34165
	1.20351								1.29998								1.33917
	1.20059								1.29755
																	1.0668
	1.56406								1.51947								1.48022
	1.51783								1.48018								1.41829
	1.37338								1.47491								1.39485
	1.2737								1.34087								1.42781
	1.21213								1.30748								1.4369
	1.20932								1.29769								1.45365
	1.20637
	1.20251								1.55218								1.0668
	1.19945								1.50027								1.43199
									1.48175								1.44123
	1.56008								1.38691								1.40996
	1.51475								1.30591								1.44412
	1.37083								1.30121								1.48453
	1.27171								1.29884								1.49801
	1.21071
	1.20868								1.52347								1.0668
	1.2046								1.48361								1.49127
	1.20108								1.47841								1.43409
	1.19817								1.34227								1.42084
									1.30883								1.41554
	1.55626								1.29906								1.41595
	1.51075																1.38015
	1.36841								1.55627
	1.27024								1.50334
	1.20988								1.48548
	1.20695								1.38853
	1.20363								1.30747
	1.19927								1.30265
	1.19622								1.30001
	1.55275								1.52728
	1.50718								1.48694
	1.36556								1.48199
	1.26829								1.34394
	1.2084								1.31015
	1.20598								1.30035
	1.20205
	1.19832								1.56049
	1.19518								1.50708
									1.48813
									1.38989
									1.30842
									1.30361
									1.30113
	1.06897
	1.87543
	1.7749
	2.21182
	2.08894
	1.06897
	1.53158
	1.32283
	1.06897
	1.57146
	1.52534
	1.37863
	1.27672
	1.21481
	1.21215
	1.20886
	1.20536
	1.20258
	1.56784
	1.5221								1.0668								1.0668
	1.37603								1.54721								1.48126
	1.27528								1.49641								1.3658
	1.21379								1.4784								1.36986
	1.21092								1.38496								1.35456
	1.2077								1.30451								1.34165
	1.20351								1.29998								1.33917
	1.20059								1.29755
																	1.0668
	1.56406								1.51947								1.48022
	1.51783								1.48018								1.41829
	1.37338								1.47491								1.39485
	1.2737								1.34087								1.42781
	1.21213								1.30748								1.4369
	1.20932								1.29769								1.45365
	1.20637
	1.20251								1.55218								1.0668
	1.19945								1.50027								1.43199
									1.48175								1.44123
	1.56008								1.38691								1.40996
	1.51475								1.30591								1.44412
	1.37083								1.30121								1.48453
	1.27171								1.29884								1.49801
	1.21071
	1.20868								1.52347								1.0668
	1.2046								1.48361								1.49127
	1.20108								1.47841								1.43409
	1.19817								1.34227								1.42084
									1.30883								1.41554
	1.55626								1.29906								1.41595
	1.51075																1.38015
	1.36841								1.55627
	1.27024								1.50334
	1.20988								1.48548
	1.20695								1.38853
	1.20363								1.30747
	1.19927								1.30265
	1.19622								1.30001
	1.55275								1.52728
	1.50718								1.48694
	1.36556								1.48199
	1.26829								1.34394
	1.2084								1.31015
	1.20598								1.30035
	1.20205
	1.19832								1.56049
	1.19518								1.50708
									1.48813
									1.38989
									1.30842
									1.30361
									1.30113
	1.06897
	1.87543
	1.7749
	2.21182
	2.08894
	1.06897
	1.53158
	1.32283
	1.06897
	1.57146
	1.52534
	1.37863
	1.27672
	1.21481
	1.21215
	1.20886
	1.20536
	1.20258
	1.56784
	1.5221								1.0668								1.0668
	1.37603								1.54721								1.48126
	1.27528								1.49641								1.3658
	1.21379								1.4784								1.36986
	1.21092								1.38496								1.35456
	1.2077								1.30451								1.34165
	1.20351								1.29998								1.33917
	1.20059								1.29755
																	1.0668
	1.56406								1.51947								1.48022
	1.51783								1.48018								1.41829
	1.37338								1.47491								1.39485
	1.2737								1.34087								1.42781
	1.21213								1.30748								1.4369
	1.20932								1.29769								1.45365
	1.20637
	1.20251								1.55218								1.0668
	1.19945								1.50027								1.43199
									1.48175								1.44123
	1.56008								1.38691								1.40996
	1.51475								1.30591								1.44412
	1.37083								1.30121								1.48453
	1.27171								1.29884								1.49801
	1.21071
	1.20868								1.52347								1.0668
	1.2046								1.48361								1.49127
	1.20108								1.47841								1.43409
	1.19817								1.34227								1.42084
									1.30883								1.41554
	1.55626								1.29906								1.41595
	1.51075																1.38015
	1.36841								1.55627
	1.27024								1.50334
	1.20988								1.48548
	1.20695								1.38853
	1.20363								1.30747
	1.19927								1.30265
	1.19622								1.30001
	1.55275								1.52728
	1.50718								1.48694
	1.36556								1.48199
	1.26829								1.34394
	1.2084								1.31015
	1.20598								1.30035
	1.20205
	1.19832								1.56049
	1.19518								1.50708
									1.48813
									1.38989
									1.30842
									1.30361
									1.30113
	1.06897
	1.87543
	1.7749
	2.21182
	2.08894
	1.06897
	1.53158
	1.32283
	1.06897
	1.57146
	1.52534
	1.37863
	1.27672
	1.21481
	1.21215
	1.20886
	1.20536
	1.20258
	1.56784
	1.5221								1.0668								1.0668
	1.37603								1.54721								1.48126
	1.27528								1.49641								1.3658
	1.21379								1.4784								1.36986
	1.21092								1.38496								1.35456
	1.2077								1.30451								1.34165
	1.20351								1.29998								1.33917
	1.20059								1.29755
																	1.0668
	1.56406								1.51947								1.48022
	1.51783								1.48018								1.41829
	1.37338								1.47491								1.39485
	1.2737								1.34087								1.42781
	1.21213								1.30748								1.4369
	1.20932								1.29769								1.45365
	1.20637
	1.20251								1.55218								1.0668
	1.19945								1.50027								1.43199
									1.48175								1.44123
	1.56008								1.38691								1.40996
	1.51475								1.30591								1.44412
	1.37083								1.30121								1.48453
	1.27171								1.29884								1.49801
	1.21071
	1.20868								1.52347								1.0668
	1.2046								1.48361								1.49127
	1.20108								1.47841								1.43409
	1.19817								1.34227								1.42084
									1.30883								1.41554
	1.55626								1.29906								1.41595
	1.51075																1.38015
	1.36841								1.55627
	1.27024								1.50334
	1.20988								1.48548
	1.20695								1.38853
	1.20363								1.30747
	1.19927								1.30265
	1.19622								1.30001
	1.55275								1.52728
	1.50718								1.48694
	1.36556								1.48199
	1.26829								1.34394
	1.2084								1.31015
	1.20598								1.30035
	1.20205
	1.19832								1.56049
	1.19518								1.50708
									1.48813
									1.38989
									1.30842
									1.30361
									1.30113
	1.06897
	1.87543
	1.7749
	2.21182
	2.08894
	1.06897
	1.53158
	1.32283
	1.06897
	1.57146
	1.52534
	1.37863
	1.27672
	1.21481
	1.21215
	1.20886
	1.20536
	1.20258
	1.56784
	1.5221								1.0668								1.0668
	1.37603								1.54721								1.48126
	1.27528								1.49641								1.3658
	1.21379								1.4784								1.36986
	1.21092								1.38496								1.35456
	1.2077								1.30451								1.34165
	1.20351								1.29998								1.33917
	1.20059								1.29755
																	1.0668
	1.56406								1.51947								1.48022
	1.51783								1.48018								1.41829
	1.37338								1.47491								1.39485
	1.2737								1.34087								1.42781
	1.21213								1.30748								1.4369
	1.20932								1.29769								1.45365
	1.20637
	1.20251								1.55218								1.0668
	1.19945								1.50027								1.43199
									1.48175								1.44123
	1.56008								1.38691								1.40996
	1.51475								1.30591								1.44412
	1.37083								1.30121								1.48453
	1.27171								1.29884								1.49801
	1.21071
	1.20868								1.52347								1.0668
	1.2046								1.48361								1.49127
	1.20108								1.47841								1.43409
	1.19817								1.34227								1.42084
									1.30883								1.41554
	1.55626								1.29906								1.41595
	1.51075																1.38015
	1.36841								1.55627
	1.27024								1.50334
	1.20988								1.48548
	1.20695								1.38853
	1.20363								1.30747
	1.19927								1.30265
	1.19622								1.30001
	1.55275								1.52728
	1.50718								1.48694
	1.36556								1.48199
	1.26829								1.34394
	1.2084								1.31015
	1.20598								1.30035
	1.20205
	1.19832								1.56049
	1.19518								1.50708
									1.48813
									1.38989
									1.30842
									1.30361
									1.30113
	1.06897
	1.87543
	1.7749
	2.21182
	2.08894
	1.06897
	1.53158
	1.32283
	1.06897
	1.57146
	1.52534
	1.37863
	1.27672
	1.21481
	1.21215
	1.20886
	1.20536
	1.20258
	1.56784
	1.5221								1.0668								1.0668
	1.37603								1.54721								1.48126
	1.27528								1.49641								1.3658
	1.21379								1.4784								1.36986
	1.21092								1.38496								1.35456
	1.2077								1.30451								1.34165
	1.20351								1.29998								1.33917
	1.20059								1.29755
																	1.0668
	1.56406								1.51947								1.48022
	1.51783								1.48018								1.41829
	1.37338								1.47491								1.39485
	1.2737								1.34087								1.42781
	1.21213								1.30748								1.4369
	1.20932								1.29769								1.45365
	1.20637
	1.20251								1.55218								1.0668
	1.19945								1.50027								1.43199
									1.48175								1.44123
	1.56008								1.38691								1.40996
	1.51475								1.30591								1.44412
	1.37083								1.30121								1.48453
	1.27171								1.29884								1.49801
	1.21071
	1.20868								1.52347								1.0668
	1.2046								1.48361								1.49127
	1.20108								1.47841								1.43409
	1.19817								1.34227								1.42084
									1.30883								1.41554
	1.55626								1.29906								1.41595
	1.51075																1.38015
	1.36841								1.55627
	1.27024								1.50334
	1.20988								1.48548
	1.20695								1.38853
	1.20363								1.30747
	1.19927								1.30265
	1.19622								1.30001
	1.55275								1.52728
	1.50718								1.48694
	1.36556								1.48199
	1.26829								1.34394
	1.2084								1.31015
	1.20598								1.30035
	1.20205
	1.19832								1.56049
	1.19518								1.50708
									1.48813
									1.38989
									1.30842
									1.30361
									1.30113
	1.06897
	1.87543
	1.7749
	2.21182
	2.08894
	1.06897
	1.53158
	1.32283
	1.06897
	1.57146
	1.52534
	1.37863
	1.27672
	1.21481
	1.21215
	1.20886
	1.20536
	1.20258
	1.56784
	1.5221								1.0668								1.0668
	1.37603								1.54721								1.48126
	1.27528								1.49641								1.3658
	1.21379								1.4784								1.36986
	1.21092								1.38496								1.35456
	1.2077								1.30451								1.34165
	1.20351								1.29998								1.33917
	1.20059								1.29755
																	1.0668
	1.56406								1.51947								1.48022
	1.51783								1.48018								1.41829
	1.37338								1.47491								1.39485
	1.2737								1.34087								1.42781
	1.21213								1.30748								1.4369
	1.20932								1.29769								1.45365
	1.20637
	1.20251								1.55218								1.0668
	1.19945								1.50027								1.43199
									1.48175								1.44123
	1.56008								1.38691								1.40996
	1.51475								1.30591								1.44412
	1.37083								1.30121								1.48453
	1.27171								1.29884								1.49801
	1.21071
	1.20868								1.52347								1.0668
	1.2046								1.48361								1.49127
	1.20108								1.47841								1.43409
	1.19817								1.34227								1.42084
									1.30883								1.41554
	1.55626								1.29906								1.41595
	1.51075																1.38015
	1.36841								1.55627
	1.27024								1.50334
	1.20988								1.48548
	1.20695								1.38853
	1.20363								1.30747
	1.19927								1.30265
	1.19622								1.30001
	1.55275								1.52728
	1.50718								1.48694
	1.36556								1.48199
	1.26829								1.34394
	1.2084								1.31015
	1.20598								1.30035
	1.20205
	1.19832								1.56049
	1.19518								1.50708
									1.48813
									1.38989
									1.30842
									1.30361
									1.30113
	1.06897
	1.87543
	1.7749
	2.21182
	2.08894
	1.06897
	1.53158
	1.32283
	1.06897
	1.57146
	1.52534
	1.37863
	1.27672
	1.21481
	1.21215
	1.20886
	1.20536
	1.20258
	1.56784
	1.5221								1.0668								1.0668
	1.37603								1.54721								1.48126
	1.27528								1.49641								1.3658
	1.21379								1.4784								1.36986
	1.21092								1.38496								1.35456
	1.2077								1.30451								1.34165
	1.20351								1.29998								1.33917
	1.20059								1.29755
																	1.0668
	1.56406								1.51947								1.48022
	1.51783								1.48018								1.41829
	1.37338								1.47491								1.39485
	1.2737								1.34087								1.42781
	1.21213								1.30748								1.4369
	1.20932								1.29769								1.45365
	1.20637
	1.20251								1.55218								1.0668
	1.19945								1.50027								1.43199
									1.48175								1.44123
	1.56008								1.38691								1.40996
	1.51475								1.30591								1.44412
	1.37083								1.30121								1.48453
	1.27171								1.29884								1.49801
	1.21071
	1.20868								1.52347								1.0668
	1.2046								1.48361								1.49127
	1.20108								1.47841								1.43409
	1.19817								1.34227								1.42084
									1.30883								1.41554
	1.55626								1.29906								1.41595
	1.51075																1.38015
	1.36841								1.55627
	1.27024								1.50334
	1.20988								1.48548
	1.20695								1.38853
	1.20363								1.30747
	1.19927								1.30265
	1.19622								1.30001
	1.55275								1.52728
	1.50718								1.48694
	1.36556								1.48199
	1.26829								1.34394
	1.2084								1.31015
	1.20598								1.30035
	1.20205
	1.19832								1.56049
	1.19518								1.50708
									1.48813
									1.38989
									1.30842
									1.30361
									1.30113
	1.06897
	1.87543
	1.7749
	2.21182
	2.08894
	1.06897
	1.53158
	1.32283
	1.06897
	1.57146
	1.52534
	1.37863
	1.27672
	1.21481
	1.21215
	1.20886
	1.20536
	1.20258
	1.56784
	1.5221								1.0668								1.0668
	1.37603								1.54721								1.48126
	1.27528								1.49641								1.3658
	1.21379								1.4784								1.36986
	1.21092								1.38496								1.35456
	1.2077								1.30451								1.34165
	1.20351								1.29998								1.33917
	1.20059								1.29755
																	1.0668
	1.56406								1.51947								1.48022
	1.51783								1.48018								1.41829
	1.37338								1.47491								1.39485
	1.2737								1.34087								1.42781
	1.21213								1.30748								1.4369
	1.20932								1.29769								1.45365
	1.20637
	1.20251								1.55218								1.0668
	1.19945								1.50027								1.43199
									1.48175								1.44123
	1.56008								1.38691								1.40996
	1.51475								1.30591								1.44412
	1.37083								1.30121								1.48453
	1.27171								1.29884								1.49801
	1.21071
	1.20868								1.52347								1.0668
	1.2046								1.48361								1.49127
	1.20108								1.47841								1.43409
	1.19817								1.34227								1.42084
									1.30883								1.41554
	1.55626								1.29906								1.41595
	1.51075																1.38015
	1.36841								1.55627
	1.27024								1.50334
	1.20988								1.48548
	1.20695								1.38853
	1.20363								1.30747
	1.19927								1.30265
	1.19622								1.30001
	1.55275								1.52728
	1.50718								1.48694
	1.36556								1.48199
	1.26829								1.34394
	1.2084								1.31015
	1.20598								1.30035
	1.20205
	1.19832								1.56049
	1.19518								1.50708
									1.48813
									1.38989
									1.30842
									1.30361
									1.30113
	1.06897
	1.87543
	1.7749
	2.21182
	2.08894
	1.06897
	1.53158
	1.32283
	1.06897
	1.57146
	1.52534
	1.37863
	1.27672
	1.21481
	1.21215
	1.20886
	1.20536
	1.20258
	1.56784
	1.5221								1.0668								1.0668
	1.37603								1.54721								1.48126
	1.27528								1.49641								1.3658
	1.21379								1.4784								1.36986
	1.21092								1.38496								1.35456
	1.2077								1.30451								1.34165
	1.20351								1.29998								1.33917
	1.20059								1.29755
																	1.0668
	1.56406								1.51947								1.48022
	1.51783								1.48018								1.41829
	1.37338								1.47491								1.39485
	1.2737								1.34087								1.42781
	1.21213								1.30748								1.4369
	1.20932								1.29769								1.45365
	1.20637
	1.20251								1.55218								1.0668
	1.19945								1.50027								1.43199
									1.48175								1.44123
	1.56008								1.38691								1.40996
	1.51475								1.30591								1.44412
	1.37083								1.30121								1.48453
	1.27171								1.29884								1.49801
	1.21071
	1.20868								1.52347								1.0668
	1.2046								1.48361								1.49127
	1.20108								1.47841								1.43409
	1.19817								1.34227								1.42084
									1.30883								1.41554
	1.55626								1.29906								1.41595
	1.51075																1.38015
	1.36841								1.55627
	1.27024								1.50334
	1.20988								1.48548
	1.20695								1.38853
	1.20363								1.30747
	1.19927								1.30265
	1.19622								1.30001
	1.55275								1.52728
	1.50718								1.48694
	1.36556								1.48199
	1.26829								1.34394
	1.2084								1.31015
	1.20598								1.30035
	1.20205
	1.19832								1.56049
	1.19518								1.50708
									1.48813
									1.38989
									1.30842
									1.30361
									1.30113
	1.06897
	1.87543
	1.7749
	2.21182
	2.08894
	1.06897
	1.53158
	1.32283
	1.06897
	1.57146
	1.52534
	1.37863
	1.27672
	1.21481
	1.21215
	1.20886
	1.20536
	1.20258
	1.56784
	1.5221								1.0668								1.0668
	1.37603								1.54721								1.48126
	1.27528								1.49641								1.3658
	1.21379								1.4784								1.36986
	1.21092								1.38496								1.35456
	1.2077								1.30451								1.34165
	1.20351								1.29998								1.33917
	1.20059								1.29755
																	1.0668
	1.56406								1.51947								1.48022
	1.51783								1.48018								1.41829
	1.37338								1.47491								1.39485
	1.2737								1.34087								1.42781
	1.21213								1.30748								1.4369
	1.20932								1.29769								1.45365
	1.20637
	1.20251								1.55218								1.0668
	1.19945								1.50027								1.43199
									1.48175								1.44123
	1.56008								1.38691								1.40996
	1.51475								1.30591								1.44412
	1.37083								1.30121								1.48453
	1.27171								1.29884								1.49801
	1.21071
	1.20868								1.52347								1.0668
	1.2046								1.48361								1.49127
	1.20108								1.47841								1.43409
	1.19817								1.34227								1.42084
									1.30883								1.41554
	1.55626								1.29906								1.41595
	1.51075																1.38015
	1.36841								1.55627
	1.27024								1.50334
	1.20988								1.48548
	1.20695								1.38853
	1.20363								1.30747
	1.19927								1.30265
	1.19622								1.30001
	1.55275								1.52728
	1.50718								1.48694
	1.36556								1.48199
	1.26829								1.34394
	1.2084								1.31015
	1.20598								1.30035
	1.20205
	1.19832								1.56049
	1.19518								1.50708
									1.48813
									1.38989
									1.30842
									1.30361
									1.30113
	1.06897
	1.87543
	1.7749
	2.21182
	2.08894
	1.06897
	1.53158
	1.32283
	1.06897
	1.57146
	1.52534
	1.37863
	1.27672
	1.21481
	1.21215
	1.20886
	1.20536
	1.20258
	1.56784
	1.5221								1.0668								1.0668
	1.37603								1.54721								1.48126
	1.27528								1.49641								1.3658
	1.21379								1.4784								1.36986
	1.21092								1.38496								1.35456
	1.2077								1.30451								1.34165
	1.20351								1.29998								1.33917
	1.20059								1.29755
																	1.0668
	1.56406								1.51947								1.48022
	1.51783								1.48018								1.41829
	1.37338								1.47491								1.39485
	1.2737								1.34087								1.42781
	1.21213								1.30748								1.4369
	1.20932								1.29769								1.45365
	1.20637
	1.20251								1.55218								1.0668
	1.19945								1.50027								1.43199
									1.48175								1.44123
	1.56008								1.38691								1.40996
	1.51475								1.30591								1.44412
	1.37083								1.30121								1.48453
	1.27171								1.29884								1.49801
	1.21071
	1.20868								1.52347								1.0668
	1.2046								1.48361								1.49127
	1.20108								1.47841								1.43409
	1.19817								1.34227								1.42084
									1.30883								1.41554
	1.55626								1.29906								1.41595
	1.51075																1.38015
	1.36841								1.55627
	1.27024								1.50334
	1.20988								1.48548
	1.20695								1.38853
	1.20363								1.30747
	1.19927								1.30265
	1.19622								1.30001
	1.55275								1.52728
	1.50718								1.48694
	1.36556								1.48199
	1.26829								1.34394
	1.2084								1.31015
	1.20598								1.30035
	1.20205
	1.19832								1.56049
	1.19518								1.50708
									1.48813
									1.38989
									1.30842
									1.30361
									1.30113
	1.06897
	1.87543
	1.7749
	2.21182
	2.08894
	1.06897
	1.53158
	1.32283
	1.06897
	1.57146
	1.52534
	1.37863
	1.27672
	1.21481
	1.21215
	1.20886
	1.20536
	1.20258
	1.56784
	1.5221								1.0668								1.0668
	1.37603								1.54721								1.48126
	1.27528								1.49641								1.3658
	1.21379								1.4784								1.36986
	1.21092								1.38496								1.35456
	1.2077								1.30451								1.34165
	1.20351								1.29998								1.33917
	1.20059								1.29755
																	1.0668
	1.56406								1.51947								1.48022
	1.51783								1.48018								1.41829
	1.37338								1.47491								1.39485
	1.2737								1.34087								1.42781
	1.21213								1.30748								1.4369
	1.20932								1.29769								1.45365
	1.20637
	1.20251								1.55218								1.0668
	1.19945								1.50027								1.43199
									1.48175								1.44123
	1.56008								1.38691								1.40996
	1.51475								1.30591								1.44412
	1.37083								1.30121								1.48453
	1.27171								1.29884								1.49801
	1.21071
	1.20868								1.52347								1.0668
	1.2046								1.48361								1.49127
	1.20108								1.47841								1.43409
	1.19817								1.34227								1.42084
									1.30883								1.41554
	1.55626								1.29906								1.41595
	1.51075																1.38015
	1.36841								1.55627
	1.27024								1.50334
	1.20988								1.48548
	1.20695								1.38853
	1.20363								1.30747
	1.19927								1.30265
	1.19622								1.30001
	1.55275								1.52728
	1.50718								1.48694
	1.36556								1.48199
	1.26829								1.34394
	1.2084								1.31015
	1.20598								1.30035
	1.20205
	1.19832								1.56049
	1.19518								1.50708
									1.48813
									1.38989
									1.30842
									1.30361
									1.30113
	1.06897
	1.87543
	1.7749
	2.21182
	2.08894
	1.06897
	1.53158
	1.32283
	1.06897
	1.57146
	1.52534
	1.37863
	1.27672
	1.21481
	1.21215
	1.20886
	1.20536
	1.20258
	1.56784
	1.5221								1.0668								1.0668
	1.37603								1.54721								1.48126
	1.27528								1.49641								1.3658
	1.21379								1.4784								1.36986
	1.21092								1.38496								1.35456
	1.2077								1.30451								1.34165
	1.20351								1.29998								1.33917
	1.20059								1.29755
																	1.0668
	1.56406								1.51947								1.48022
	1.51783								1.48018								1.41829
	1.37338								1.47491								1.39485
	1.2737								1.34087								1.42781
	1.21213								1.30748								1.4369
	1.20932								1.29769								1.45365
	1.20637
	1.20251								1.55218								1.0668
	1.19945								1.50027								1.43199
									1.48175								1.44123
	1.56008								1.38691								1.40996
	1.51475								1.30591								1.44412
	1.37083								1.30121								1.48453
	1.27171								1.29884								1.49801
	1.21071
	1.20868								1.52347								1.0668
	1.2046								1.48361								1.49127
	1.20108								1.47841								1.43409
	1.19817								1.34227								1.42084
									1.30883								1.41554
	1.55626								1.29906								1.41595
	1.51075																1.38015
	1.36841								1.55627
	1.27024								1.50334
	1.20988								1.48548
	1.20695								1.38853
	1.20363								1.30747
	1.19927								1.30265
	1.19622								1.30001
	1.55275								1.52728
	1.50718								1.48694
	1.36556								1.48199
	1.26829								1.34394
	1.2084								1.31015
	1.20598								1.30035
	1.20205
	1.19832								1.56049
	1.19518								1.50708
									1.48813
									1.38989
									1.30842
									1.30361
									1.30113
	1.06897
	1.87543
	1.7749
	2.21182
	2.08894
	1.06897
	1.53158
	1.32283
	1.06897
	1.57146
	1.52534
	1.37863
	1.27672
	1.21481
	1.21215
	1.20886
	1.20536
	1.20258
	1.56784
	1.5221								1.0668								1.0668
	1.37603								1.54721								1.48126
	1.27528								1.49641								1.3658
	1.21379								1.4784								1.36986
	1.21092								1.38496								1.35456
	1.2077								1.30451								1.34165
	1.20351								1.29998								1.33917
	1.20059								1.29755
																	1.0668
	1.56406								1.51947								1.48022
	1.51783								1.48018								1.41829
	1.37338								1.47491								1.39485
	1.2737								1.34087								1.42781
	1.21213								1.30748								1.4369
	1.20932								1.29769								1.45365
	1.20637
	1.20251								1.55218								1.0668
	1.19945								1.50027								1.43199
									1.48175								1.44123
	1.56008								1.38691								1.40996
	1.51475								1.30591								1.44412
	1.37083								1.30121								1.48453
	1.27171								1.29884								1.49801
	1.21071
	1.20868								1.52347								1.0668
	1.2046								1.48361								1.49127
	1.20108								1.47841								1.43409
	1.19817								1.34227								1.42084
									1.30883								1.41554
	1.55626								1.29906								1.41595
	1.51075																1.38015
	1.36841								1.55627
	1.27024								1.50334
	1.20988								1.48548
	1.20695								1.38853
	1.20363								1.30747
	1.19927								1.30265
	1.19622								1.30001
	1.55275								1.52728
	1.50718								1.48694
	1.36556								1.48199
	1.26829								1.34394
	1.2084								1.31015
	1.20598								1.30035
	1.20205
	1.19832								1.56049
	1.19518								1.50708
									1.48813
									1.38989
									1.30842
									1.30361
									1.30113
	1.06897
	1.87543
	1.7749
	2.21182
	2.08894
	1.06897
	1.53158
	1.32283
	1.06897
	1.57146
	1.52534
	1.37863
	1.27672
	1.21481
	1.21215
	1.20886
	1.20536
	1.20258
	1.56784
	1.5221								1.0668								1.0668
	1.37603								1.54721								1.48126
	1.27528								1.49641								1.3658
	1.21379								1.4784								1.36986
	1.21092								1.38496								1.35456
	1.2077								1.30451								1.34165
	1.20351								1.29998								1.33917
	1.20059								1.29755
																	1.0668
	1.56406								1.51947								1.48022
	1.51783								1.48018								1.41829
	1.37338								1.47491								1.39485
	1.2737								1.34087								1.42781
	1.21213								1.30748								1.4369
	1.20932								1.29769								1.45365
	1.20637
	1.20251								1.55218								1.0668
	1.19945								1.50027								1.43199
									1.48175								1.44123
	1.56008								1.38691								1.40996
	1.51475								1.30591								1.44412
	1.37083								1.30121								1.48453
	1.27171								1.29884								1.49801
	1.21071
	1.20868								1.52347								1.0668
	1.2046								1.48361								1.49127
	1.20108								1.47841								1.43409
	1.19817								1.34227								1.42084
									1.30883								1.41554
	1.55626								1.29906								1.41595
	1.51075																1.38015
	1.36841								1.55627
	1.27024								1.50334
	1.20988								1.48548
	1.20695								1.38853
	1.20363								1.30747
	1.19927								1.30265
	1.19622								1.30001
	1.55275								1.52728
	1.50718								1.48694
	1.36556								1.48199
	1.26829								1.34394
	1.2084								1.31015
	1.20598								1.30035
	1.20205
	1.19832								1.56049
	1.19518								1.50708
									1.48813
									1.38989
									1.30842
									1.30361
									1.30113
	1.06897
	1.87543
	1.7749
	2.21182
	2.08894
	1.06897
	1.53158
	1.32283
	1.06897
	1.57146
	1.52534
	1.37863
	1.27672
	1.21481
	1.21215
	1.20886
	1.20536
	1.20258
	1.56784
	1.5221								1.0668								1.0668
	1.37603								1.54721								1.48126
	1.27528								1.49641								1.3658
	1.21379								1.4784								1.36986
	1.21092								1.38496								1.35456
	1.2077								1.30451								1.34165
	1.20351								1.29998								1.33917
	1.20059								1.29755
																	1.0668
	1.56406								1.51947								1.48022
	1.51783								1.48018								1.41829
	1.37338								1.47491								1.39485
	1.2737								1.34087								1.42781
	1.21213								1.30748								1.4369
	1.20932								1.29769								1.45365
	1.20637
	1.20251								1.55218								1.0668
	1.19945								1.50027								1.43199
									1.48175								1.44123
	1.56008								1.38691								1.40996
	1.51475								1.30591								1.44412
	1.37083								1.30121								1.48453
	1.27171								1.29884								1.49801
	1.21071
	1.20868								1.52347								1.0668
	1.2046								1.48361								1.49127
	1.20108								1.47841								1.43409
	1.19817								1.34227								1.42084
									1.30883								1.41554
	1.55626								1.29906								1.41595
	1.51075																1.38015
	1.36841								1.55627
	1.27024								1.50334
	1.20988								1.48548
	1.20695								1.38853
	1.20363								1.30747
	1.19927								1.30265
	1.19622								1.30001
	1.55275								1.52728
	1.50718								1.48694
	1.36556								1.48199
	1.26829								1.34394
	1.2084								1.31015
	1.20598								1.30035
	1.20205
	1.19832								1.56049
	1.19518								1.50708
									1.48813
									1.38989
									1.30842
									1.30361
									1.30113
	1.06897
	1.87543
	1.7749
	2.21182
	2.08894
	1.06897
	1.53158
	1.32283
	1.06897
	1.57146
	1.52534
	1.37863
	1.27672
	1.21481
	1.21215
	1.20886
	1.20536
	1.20258
	1.56784
	1.5221								1.0668								1.0668
	1.37603								1.54721								1.48126
	1.27528								1.49641								1.3658
	1.21379								1.4784								1.36986
	1.21092								1.38496								1.35456
	1.2077								1.30451								1.34165
	1.20351								1.29998								1.33917
	1.20059								1.29755
																	1.0668
	1.56406								1.51947								1.48022
	1.51783								1.48018								1.41829
	1.37338								1.47491								1.39485
	1.2737								1.34087								1.42781
	1.21213								1.30748								1.4369
	1.20932								1.29769								1.45365
	1.20637
	1.20251								1.55218								1.0668
	1.19945								1.50027								1.43199
									1.48175								1.44123
	1.56008								1.38691								1.40996
	1.51475								1.30591								1.44412
	1.37083								1.30121								1.48453
	1.27171								1.29884								1.49801
	1.21071
	1.20868								1.52347								1.0668
	1.2046								1.48361								1.49127
	1.20108								1.47841								1.43409
	1.19817								1.34227								1.42084
									1.30883								1.41554
	1.55626								1.29906								1.41595
	1.51075																1.38015
	1.36841								1.55627
	1.27024								1.50334
	1.20988								1.48548
	1.20695								1.38853
	1.20363								1.30747
	1.19927								1.30265
	1.19622								1.30001
	1.55275								1.52728
	1.50718								1.48694
	1.36556								1.48199
	1.26829								1.34394
	1.2084								1.31015
	1.20598								1.30035
	1.20205
	1.19832								1.56049
	1.19518								1.50708
									1.48813
									1.38989
									1.30842
									1.30361
									1.30113
	1.06897
	1.87543
	1.7749
	2.21182
	2.08894
	1.06897
	1.53158
	1.32283
	1.06897
	1.57146
	1.52534
	1.37863
	1.27672
	1.21481
	1.21215
	1.20886
	1.20536
	1.20258
	1.56784
	1.5221								1.0668								1.0668
	1.37603								1.54721								1.48126
	1.27528								1.49641								1.3658
	1.21379								1.4784								1.36986
	1.21092								1.38496								1.35456
	1.2077								1.30451								1.34165
	1.20351								1.29998								1.33917
	1.20059								1.29755
																	1.0668
	1.56406								1.51947								1.48022
	1.51783								1.48018								1.41829
	1.37338								1.47491								1.39485
	1.2737								1.34087								1.42781
	1.21213								1.30748								1.4369
	1.20932								1.29769								1.45365
	1.20637
	1.20251								1.55218								1.0668
	1.19945								1.50027								1.43199
									1.48175								1.44123
	1.56008								1.38691								1.40996
	1.51475								1.30591								1.44412
	1.37083								1.30121								1.48453
	1.27171								1.29884								1.49801
	1.21071
	1.20868								1.52347								1.0668
	1.2046								1.48361								1.49127
	1.20108								1.47841								1.43409
	1.19817								1.34227								1.42084
									1.30883								1.41554
	1.55626								1.29906								1.41595
	1.51075																1.38015
	1.36841								1.55627
	1.27024								1.50334
	1.20988								1.48548
	1.20695								1.38853
	1.20363								1.30747
	1.19927								1.30265
	1.19622								1.30001
	1.55275								1.52728
	1.50718								1.48694
	1.36556								1.48199
	1.26829								1.34394
	1.2084								1.31015
	1.20598								1.30035
	1.20205
	1.19832								1.56049
	1.19518								1.50708
									1.48813
									1.38989
									1.30842
									1.30361
									1.30113
	1.06897
	1.87543
	1.7749
	2.21182
	2.08894
	1.06897
	1.53158
	1.32283
	1.06897
	1.57146
	1.52534
	1.37863
	1.27672
	1.21481
	1.21215
	1.20886
	1.20536
	1.20258
	1.56784
	1.5221								1.0668								1.0668
	1.37603								1.54721								1.48126
	1.27528								1.49641								1.3658
	1.21379								1.4784								1.36986
	1.21092								1.38496								1.35456
	1.2077								1.30451								1.34165
	1.20351								1.29998								1.33917
	1.20059								1.29755
																	1.0668
	1.56406								1.51947								1.48022
	1.51783								1.48018								1.41829
	1.37338								1.47491								1.39485
	1.2737								1.34087								1.42781
	1.21213								1.30748								1.4369
	1.20932								1.29769								1.45365
	1.20637
[truncated: 2,529 more rows]

## Sheet: Q5
Ratio= sum526-530nm/sum491-495nm)										EFFCIENCY	42.49*(LN(RATIO))+21.297
CaM WT			CaM 124			CaM 3				CaM WT			CaM 124			CaM 3
EGTA	Ca2+		EGTA	Ca2+		EGTA	Ca2+			EGTA	Ca2+		EGTA	Ca2+		EGTA	Ca2+
1.5922	1.2601		1.585	1.5005		1.6064	1.3134			41.0598	31.1203		40.8672	38.5394		41.4371	32.8806
1.6227	1.2675		1.5742	1.4466		1.6189	1.3383			41.866	31.3691		40.5767	36.985		41.7664	33.6786
1.5781	1.3032		1.5922	1.4309		1.6013	1.3378			40.6819	32.5493		41.0598	36.5213		41.302	33.6627
1.6187	1.348		1.5732	1.4332		1.6127	1.3479			41.7612	33.9854		40.5497	36.5896		41.6034	33.9823
1.5864	1.3435		1.5874	1.4921		1.6201	1.3656			40.9047	33.8434		40.9315	38.3008		41.7979	34.5366
1.6124	1.2922		1.5901	1.4345		1.5984	1.3514			41.5955	32.1891		41.0037	36.6281		41.2249	34.0925
Normalized
CaM WT			CaM 3			CaM 124				Difference Apo-Holo
EGTA	Ca2+		EGTA	Ca2+		EGTA	Ca2+			CaM WT			CaM124			CaM3
98.1204	77.6545		97.6767	92.4693		98.9955	80.9392			9.9395			2.32786			8.55649
100	78.1106		97.0112	89.1477		99.7658	82.4737			10.4969			3.59173			8.08783
97.2515	80.3106		98.1204	88.1802		98.6812	82.4428			8.13254			4.53849			7.63925
99.7535	83.0714		96.9495	88.3219		99.3837	83.0653			7.77573			3.96016			7.62109
97.763	82.7941		97.8246	91.9517		99.8398	84.156			7.06138			2.63068			7.26129
99.3653	79.6327		97.991	88.402		98.5025	83.281			9.40633			4.37564			7.13246
Difference	Holo-Apo
CaM WT			CaM3			CaM124
20.4659			5.20737			18.0563
21.8894			7.86344			17.2922
16.9409			9.94022			16.2384
16.6821			8.6276			16.3185
14.9689			5.87293			15.6837
19.7325			9.58896			15.2215
Normalized difference
CaM WT			CaM3			CaM124
93.4966			23.7894			82.4887
100			35.9234			78.9977
77.393			45.411			74.1836
76.2106			39.4144			74.5495
68.384			26.83			71.6498
90.1464			43.8063			69.5383
STATISTICS
Column	Size	Missing	Mean	Std Dev	Std. Error	C.I. of Mean
CaM WT	6	0	84.272	12.097	4.939	12.695
CaM 3	6	0	35.862	8.88	3.625	9.319
CaM 124	6	0	75.235	4.768	1.946	5.003
