# Supplementary material for: Redox regulation of KV7 channels through EF3 hand of calmodulin
Source: eLife. 2023 Feb 20;12:e81961. doi: 10.7554/eLife.81961 (PMC9988260; doi:10.7554/eLife.81961)
Supplement: Figure 2—source data 1. [file elife-81961-fig2-data1.xlsx]

## Sheet: RAW + %
Ratio= sum526-530/sum491-495
WT EGTA	WT CA	CAM4 EGTA	CAM4 CA	CAM3 EGTA	CAM3 CA	CAM124 EGTA	CAM124 CA	CAM123 EGTA	CAM13 CA	CaM1234 EGTA	CaM1234 Ca
1.7224	1.283	1.7992	1.3833	1.7588	1.6741	1.6419	1.3337	1.7012	1.549	1.77134	1.75846		STATISTICS
1.7183	1.2766	1.7632	1.3844	1.7483	1.6807	1.6498	1.3286	1.6761	1.5412	1.74683	1.76782
1.6977	1.2867	1.8095	1.3947	1.7454	1.6957	1.6568	1.323	1.6869	1.5594	1.69786	1.74332		Column	Size	Missing	Mean	Std Dev	Std. Error	C.I. of Mean
1.7107	1.2792	1.7859	1.3779	1.7307	1.6899	1.6633	1.3164	1.6899	1.5506	1.79641	1.6939		WT EGTA	6	0	99.168	0.658	0.269	0.69
1.7058	1.2728	1.7507	1.3792	1.7286	1.6813	1.6694	1.3099	1.6658	1.5403	1.72548	1.72104		WT CA	6	0	74.32	0.288	0.117	0.302
1.6935	1.2822	1.7965	1.3894	1.7597	1.6754	1.6747	1.3671	1.6756	1.5322	1.75638	1.75176		CAM4 EGTA	6	0	103.586	1.319	0.539	1.385
						1.6794							CAM4 CA	6	0	80.4	0.368	0.15	0.386
NORMALIZED %													CAM3 EGTA	6	0	101.327	0.775	0.316	0.813
WT EGTA	WT CA	CAM4 EGTA	CAM4 CA	CAM3 EGTA	CAM3 CA	CAM124 EGTA	CAM124 CA	CAM123 EGTA	CAM13 CA	CaM1234 EGTA	CaM1234 Ca
100	74.4891	104.459	80.3124	102.113	97.1958	95.3263	77.4327	98.7692	89.9327	102.841	102.094		CAM3 CA	6	0	97.704	0.488	0.199	0.513
99.762	74.1175	102.369	80.3762	101.504	97.579	95.785	77.1366	97.3119	89.4798	101.419	102.637		CAM124 EGTA	7	0	96.504	0.786	0.297	0.727
98.566	74.7039	105.057	80.9742	101.335	98.4498	96.1914	76.8114	97.9389	90.5365	98.575	101.215		CAM124 CA	6	0	77.205	1.17	0.478	1.228
99.3207	74.2685	103.687	79.9988	100.482	98.1131	96.5687	76.4282	98.1131	90.0255	104.297	98.3454		CAM123 EGTA	6	0	97.688	0.73	0.298	0.766
99.0362	73.8969	101.643	80.0743	100.36	97.6138	96.9229	76.0509	96.7139	89.4275	100.179	99.9209		CAM13 CA	6	0	89.727	0.553	0.226	0.581
98.3221	74.4426	104.302	80.6665	102.166	97.2712	97.2306	79.3718	97.2829	88.9573	101.973	101.705		CaM1234 EGTA	6	0	101.547	2.007	0.819	2.106
						97.5035							CaM1234 Ca	6	0	100.986	1.589	0.649	1.668
DIFFERENCE (FRET HOLO - FRET APO)
CaMWT		CaM4		CaM3		CaM124		CaM123		CaM1234
25.5109		24.1465		4.91756		17.8936		8.83651		0.747672
25.6444		21.9926		3.92476		18.6484		7.83209		-1.21836
23.8621		24.0827		2.88551		19.3799		7.40246		-2.63953
25.0523		23.6879		2.36879		20.1405		8.08755		5.95138
25.1393		21.5687		2.74617		20.872		7.28634		0.2578
23.8795		23.6356		4.89433		17.8588		8.32559		0.2678
100		94.6518		19.2763		70.1411		34.6381		2.93079
100.523		86.2085		15.3846		73.0997		30.701		-4.77584
93.5366		94.4015		11.3109		75.9672		29.0168		-10.3467
98.2021		92.8539		9.28539		78.9486		31.7023		23.3288
98.5435		84.5471		10.7647		81.8161		28.5617		1.01055
93.6049		92.6491		19.1853		70.0046		32.6354		1.04975
Column	Size	Missing	Mean	Std Dev	Std. Error	C.I. of Mean
CaMWT	6	0	97.402	3.092	1.262	3.245
CaM 4	6	0	90.885	4.372	1.785	4.588
CaM3	6	0	14.201	4.389	1.792	4.606
CaM124	6	0	74.996	4.799	1.959	5.036
Col 5	6	0	31.209	2.285	0.933	2.398
Col 6	6	0	2.2	11.452	4.675	12.018
cam wt	cam 4	cam124	cam3	cam123	CaM1234
100	90.5958	73.5717	35.072	18.8808
100	83.5735	75.7222	31.3104	15.0341
100	94.6864	83.2319	31.2274	11.771
100	90.5604	82.6637	32.6741	9.34303
100	83.6111	84.8414	29.6807	10.7816
100	93.313	75.6113	35.2471	19.7217
Data source: Data 1 in FIGURE_1.JNB
Column	Size	Missing	Mean	Std Dev	Std. Error	C.I. of Mean
CaM WT	6	0	100000	0,000	0,000	0,000
CaM 4	6	0	89390	4764	1945	5000
CaM 124	6	0	79274	4831	1972	5070
CaM 3	6	0	32535	2244	0,916	2354
CaM 123	6	0	14255	4342	1772	4556
Column	Range	Max	Min	Median	0.25	0.75
CaM WT	0,000	100000	100000	100000	100000	100000
CaM 4	11113	94686	83574	90578	83611	93313
CaM 124	11270	84841	73572	79193	75611	83232
CaM 3	5566	35247	29681	31992	31227	35072
CaM 123	10379	19722	9343	13403	10782	18881

## Sheet: EFFICENCY
Ratio= sum526-530/sum491-495
WT EGTA	WT CA	CAM4 EGTA	CAM4 CA	CAM3 EGTA	CAM3 CA	CAM124 EGTA	CAM124 CA	CAM123 EGTA	CAM13 CA	CaM1234 EGTA	CaM1234 Ca
1.7224	1.283	1.7992	1.3833	1.7588	1.6741	1.6419	1.3337	1.7012	1.549	1.77134	1.75846
1.7183	1.2766	1.7632	1.3844	1.7483	1.6807	1.6498	1.3286	1.6761	1.5412	1.74683	1.76782
1.6977	1.2867	1.8095	1.3947	1.7454	1.6957	1.6568	1.323	1.6869	1.5594	1.69786	1.74332
1.7107	1.2792	1.7859	1.3779	1.7307	1.6899	1.6633	1.3164	1.6899	1.5506	1.79641	1.6939
1.7058	1.2728	1.7507	1.3792	1.7286	1.6813	1.6694	1.3099	1.6658	1.5403	1.72548	1.72104
1.6935	1.2822	1.7965	1.3894	1.7597	1.6754	1.6747	1.3671	1.6756	1.5322	1.75638	1.75176
EFFCIENCY	42.49*(LN(RATIO))+21.297
WT EGTA	WT CA	CAM4 EGTA	CAM4 CA	CAM3 EGTA	CAM3 CA	CAM124 EGTA	CAM124 CA	CAM123 EGTA	CAM13 CA	CaM1234 EGTA	CaM1234 Ca
44.3996	31.8856	46.2532	35.0838	45.2882	43.1911	42.3658	33.5323	43.8734	39.891	45.59	45.28
44.2983	31.6731	45.3944	35.1176	45.0338	43.3582	42.5698	33.3695	43.2418	39.6765	44.9981	45.5055
43.7859	32.0079	46.4957	35.4325	44.9632	43.7358	42.7497	33.19	43.5147	40.1754	43.7898	44.9125
44.11	31.7595	45.9379	34.9176	44.6039	43.5902	42.9161	32.9775	43.5902	39.9349	46.1872	43.6907
43.9881	31.5464	45.0921	34.9577	44.5523	43.3734	43.0716	32.7672	42.9799	39.6517	44.4755	44.366
43.6806	31.8591	46.1894	35.2708	45.3099	43.224	43.2063	34.5833	43.2291	39.4277	45.2296	45.1179
DIFFERENCE (EFF APO- EFF HOLO)
CaM WT		CAM 4		CAM 3		CAM 124		CAM 123		CaM 1234
12.5141		11.1694		2.09714		8.83355		3.98235		0.310038
12.6253		10.2768		1.67553		9.20029		3.56527		-0.507399
11.778		11.0632		1.22746		9.55966		3.33935		-1.12278
12.3505		11.0203		1.01367		9.93853		3.6553		2.49649
12.4417		10.1344		1.17887		10.3044		3.32817		0.109485
11.8216		10.9186		2.08589		8.62302		3.80144		0.111734
STATISTICS
Column	Size	Missing	Mean	Std Dev	Std. Error	C.I. of Mean
CaM WT	6	0	12.255	0.364	0.149	0.382
CaM 4	6	0	10.764	0.442	0.18	0.464
CaM 3	6	0	1.546	0.476	0.194	0.499
CaM 124	6	0	9.41	0.648	0.264	0.68
CaM 123	6	0	3.612	0.258	0.105	0.27
CaM1234	6	0	0.233	1.228	0.502	1.289
