# Supplementary material for: Redox regulation of KV7 channels through EF3 hand of calmodulin
Source: eLife. 2023 Feb 20;12:e81961. doi: 10.7554/eLife.81961 (PMC9988260; doi:10.7554/eLife.81961)
Supplement: Figure 3—source data 1. [file elife-81961-fig3-data1.xlsx]

## Sheet: RAW DATA
APO	D-CaM (SUM490-500nm/100)								D-CaM (SUM490-500nm/100)
S2S3 uM	APO 1	APO 2	APO 3						Ca + Pep	Ca + Pep	Ca + Pep
0	96.5	105.44	98.8			0	0	0	103.27	86.23	92.72	96.5
0.25	134.13	140.12	134.18			38.9948	32.8907	0.1	135.31	93.88	112.14	96.8899
0.5	140.95	150.32	142.51			46.0622	42.5645	0.25	231.16	118.29	170.98	96.9606
0.75	169.73	175.4	168.86			66.3505	75.886	0.5	258.93	172.87	211.27	97.1635
1	176.73	219	193.62			83.1399	107.701	1	273.98	205.12	234.41
1.5	200.71	228.01	209.76			107.99	116.246	2.5	279.95	219.08	244.16
2	221.66	235.35	223.6			129.699	123.208	5	281.94	226.6	248.81
4	242.11	256.89	244.15			150.891	143.636	10	283.72	233.93	253.27
8	266.57	293	273.78			176.238	177.883	0	317.73	232.98	269.45
16	275.85	298.47	281			185.855	183.071	0.5	322.57	291.69	300.54
32	297.21	296.33	290.4			207.99	181.041	1	373.58	325.02	341.81
		Ca			0	185.855	183.071	2	375.91	333.95	347.32
0.1	293.59	360.99	320.268		0.5	204.238	242.365	4	413.02	381.98	388.97
0.25	335.14	364.47	342.3		1	247.295	245.666	8	422.95	392.93	399.19
0.5	340.49	373.67	349.419		2	252.839	254.391	16	432.41	424.66	419.34
2.5	360.33	387.57	365.927		4	273.399	267.574	32	434.484	420.654	418.4
2	340.63	376.08	350.667		8	252.984	256.677	HOLO	D-CaM MAX	(S2S3/holo max)
5		339.26	331.981					S2S3 uM	HOLO 1	HOLO 2	HOLO 3
10		340.77	333.459					0	0	0	0
								0.5	1.52331	25.1996	11.5383
								1	17.5778	39.5055	26.8547
								2	18.3111	43.3385	28.8996
								4	29.9909	63.954	44.357
								8	33.1162	68.654	48.1499
								16	36.0935	82.2732	55.6281
								32	36.7463	80.5539	55.2793
									150.731	100.475
									165.305	137.875
									171.086	154.065
									173.012	162.786
									174.736	171.286
									207.669	170.184
									212.356	238.27
									261.751	276.922
									264.007	287.278
									299.942	342.978
									309.557	355.677
									318.718	392.474

## Sheet: SPECTRA
nm	D-CaM apo	S2S3 16 uM	Ca2+ 10 uM		nm	D-CaM apo	Ca2+ 10 uM	S2S3 16 uM
450	172	1214	2220		450	181	854	2502
451	176	1278	2279		451	188	873	2485
452	173	1291	2334		452	202	924	2583
453	182	1334	2372		453	211	930	2619
454	180	1382	2468		454	233	1016	2721
455	200	1432	2507		455	224	993	2789
456	232	1487	2578		456	243	1066	2911
457	250	1492	2681		457	263	1069	2939
458	232	1597	2774		458	268	1155	3081
459	264	1644	2771		459	274	1186	2945
460	275	1629	2806		460	302	1247	3100
461	298	1647	2907		461	317	1236	3093
462	296	1729	2886		462	341	1296	3201
463	321	1742	3028		463	332	1294	3121
464	287	1820	3034		464	377	1337	3228
465	346	1845	3102		465	375	1386	3384
466	381	1869	3102		466	398	1423	3359
467	376	1913	3086		467	413	1433	3364
468	390	1983	3202		468	431	1548	3416
469	414	1981	3272		469	462	1526	3460
470	440	2013	3301		470	451	1615	3530
471	455	2028	3356		471	470	1584	3635
472	462	2062	3317		472	499	1642	3552
473	450	2046	3355		473	516	1686	3656
474	524	2113	3462		474	563	1714	3590
475	508	2148	3395		475	546	1743	3482
476	528	2158	3427		476	560	1738	3613
477	538	2189	3365		477	585	1795	3618
478	572	2215	3365		478	626	1785	3598
479	598	2320	3403		479	631	1844	3588
480	614	2287	3467		480	651	1876	3653
481	619	2279	3488		481	678	1872	3653
482	658	2373	3484		482	684	1920	3557
483	670	2297	3436		483	724	1929	3623
484	691	2322	3425		484	742	1921	3690
485	725	2387	3438		485	758	1979	3554
486	738	2316	3462		486	813	1966	3601
487	752	2325	3425		487	811	2009	3563
488	742	2412	3395		488	838	2016	3454
489	773	2431	3384		489	835	2046	3519
490	799	2418	3315		490	861	1980	3485
491	743	2397	3410		491	860	2053	3497
492	850	2505	3400		492	870	2061	3506
493	836	2400	3317		493	883	2020	3429
494	905	2438	3370		494	919	2034	3393
495	873	2388	3301		495	931	2095	3438
496	921	2409	3220		496	984	2087	3493
497	875	2385	3302		497	987	2086	3408
498	940	2473	3239		498	1030	2096	3377
499	978	2476	3194		499	1016	2090	3325
500	930	2368	3154		500	1025	2083	3257
501	956	2404	3126		501	1039	2096	3267
502	974	2353	3081		502	1061	2032	3187
503	1014	2264	3133		503	1078	2086	3040
504	969	2385	2949		504	1116	2044	3066
505	982	2336	2958		505	1057	2031	3076
506	984	2217	2830		506	1046	1980	2836
507	1012	2172	2746		507	1101	1911	2816
508	976	2122	2680		508	1050	1870	2850
509	973	2150	2662		509	1085	1950	2723
510	993	2235	2586		510	1071	1920	2669
511	988	2098	2501		511	1051	1910	2644
512	966	2085	2559		512	1046	1878	2518
513	1000	1983	2401		513	1060	1877	2544
514	964	2026	2427		514	1055	1913	2454
515	996	1935	2384		515	1085	1874	2429
516	1011	1976	2337		516	1054	1822	2441
517	1027	1958	2318		517	1066	1852	2308
518	1046	1883	2235		518	1073	1811	2319
519	973	1797	2238		519	1055	1786	2281
520	1044	1865	2203		520	1124	1744	2255
521	1015	1805	2097		521	1082	1721	2079
522	1030	1811	2113		522	1089	1679	2120
523	1076	1817	2082		523	1078	1723	2100
524	992	1815	2029		524	1063	1648	2060
525	995	1712	1896		525	1078	1613	1966
526	1047	1736	1902		526	1072	1602	1992
527	1020	1724	1891		527	1031	1582	1914
528	980	1695	1877		528	1015	1559	1856
529	1006	1687	1835		529	1038	1544	1855
530	954	1635	1759		530	1019	1513	1820
531	982	1668	1759		531	1029	1465	1711
532	960	1512	1758		532	1020	1484	1670
533	957	1553	1684		533	1024	1471	1673
534	947	1534	1619		534	1011	1405	1682
535	925	1490	1592		535	1033	1413	1625
536	971	1406	1477		536	1012	1367	1547
537	899	1399	1484		537	965	1367	1505
538	928	1495	1433		538	989	1295	1427
539	895	1385	1459		539	935	1297	1456
540	890	1403	1389		540	957	1269	1374
541	892	1246	1371		541	937	1243	1439
542	868	1363	1321		542	907	1195	1365
543	872	1320	1286		543	924	1192	1347
544	873	1203	1250		544	912	1159	1298
545	851	1203	1201		545	864	1133	1221
546	855	1099	1155		546	865	1104	1231
547	810	1192	1130		547	836	1080	1152
548	798	1094	1130		548	841	1050	1178
549	818	1141	1133		549	839	1034	1108
550	766	1093	1129		550	771	970	1085
