# Supplementary material for: Redox regulation of KV7 channels through EF3 hand of calmodulin
Source: eLife. 2023 Feb 20;12:e81961. doi: 10.7554/eLife.81961 (PMC9988260; doi:10.7554/eLife.81961)
Supplement: Figure 4—figure supplement 1—source data 1. [file elife-81961-fig4-figsupp1-data1.xlsx]

## Sheet: RAW DATA
		H(r)	H(d)	S(r)	S(d)	Trn	Unrd	H	S+T	U
h202	CDSSTR	0.489	0.27	0.037	0.027	0.051	0.126	0.759	0.115	0.126
	CONTINLL	0.374	0.251	0.018	0.014	0.114	0.23
	SELCON3	0.297	0.228	0.024	0.028	0.181	0.269
	Media	0.386667	0.249667	0.0263333	0.023	0.115333	0.208333	0.636333	0.164667	0.208333
wt	CDSSTR	0.488	0.268	0.03	0.024	0.044	0.145	0.756	0.098	0.145
	CONTINLL	0.374	0.251	0.018	0.014	0.114	0.23
	SELCON3	0.297	0.228	0.024	0.028	0.181	0.269
	Media	0.386333	0.249	0.024	0.022	0.113	0.214667	0.635333	0.159	0.214667
TW_WT	CDSSTR	0.493	0.264	0.028	0.025	0.054	0.138	0.757	0.107	0.138
	CONTINLL	0.374	0.251	0.018	0.014	0.114	0.23
	SELCON3	0.297	0.228	0.024	0.028	0.181	0.269
	Media	0.388	0.247667	0.0233333	0.0223333	0.116333	0.212333	0.635667	0.162	0.212333
SK_WT	CDSSTR	0.493	0.26	0.023	0.023	0.052	0.15	0.753	0.098	0.15
	CONTINLL	0.374	0.251
	SELCON3
	Media
SK_MUT	CDSSTR	0.484	0.263	0.029	0.017	0.058	0.147
	CONTINLL	0.374	0.251	0.018	0.014	0.114	0.23
	SELCON3	0.297	0.228	0.024	0.028	0.181	0.269
	Media	0.385	0.247333	0.0236667	0.0196667	0.117667	0.215333	0.632333	0.161	0.215333

## Sheet: ESPECTRA
260	-271.779
259.8	-264.659
259.6	-266.914
259.4	-273.969
259.2	-273.335
259	-284.198
258.8	-290.547
258.6	-285.984
258.4	-283.977
258.2	-287.54
258	-299.346
257.8	-303.169
257.6	-291.207
257.4	-260.589
257.2	-229.221
257	-201.241
256.8	-190.981
256.6	-212.66
256.4	-230.821
256.2	-225.823
256	-227.393
255.8	-221.304
255.6	-207.421
255.4	-212.918
255.2	-217.721
255	-219.001
254.8	-205.769
254.6	-189.755
254.4	-162.03
254.2	-158.018
254	-170.318
253.8	-203.786
253.6	-230.772
253.4	-237.77
253.2	-237.166
253	-219.572
252.8	-217.164
252.6	-221.541
252.4	-219.447
252.2	-216.058
252	-219.633
251.8	-217.917
251.6	-228.672
251.4	-252.121
251.2	-277.751
251	-308.271
250.8	-333.414
250.6	-353.529
250.4	-354.202
250.2	-349.552
250	-364.829
249.8	-385.527
249.6	-420.749
249.4	-433.635
249.2	-457.043
249	-491.211
248.8	-526.848
248.6	-543.151
248.4	-560.085
248.2	-575.73
248	-590.769
247.8	-613.822
247.6	-641.776
247.4	-663.371
247.2	-691.168
247	-732.158
246.8	-774.635
246.6	-800.711
246.4	-829.21
246.2	-858.83
246	-881.18
245.8	-902.877
245.6	-910.624
245.4	-923.256
245.2	-946.43
245	-980.261
244.8	-1017.97
244.6	-1062.42
244.4	-1119.52
244.2	-1179.85
244	-1227.19
243.8	-1263.61
243.6	-1301.02
243.4	-1361.74
243.2	-1434.48
243	-1520.89
242.8	-1620.56
242.6	-1714.57
242.4	-1827.32
242.2	-1924.65
242	-2035.34
241.8	-2153.85
241.6	-2263.78
241.4	-2378.94
241.2	-2495.29
241	-2611.58
240.8	-2730.44
240.6	-2862.57
240.4	-3007.9
240.2	-3151.6
240	-3300.6
239.8	-3449.69
239.6	-3583.74
239.4	-3718.33
239.2	-3851.59
239	-3985.98
238.8	-4147.09
238.6	-4314.38
238.4	-4488.48
238.2	-4674.56
238	-4867.45
237.8	-5051.51
237.6	-5235.43
237.4	-5429.73
237.2	-5622.93
237	-5814.56
236.8	-6025.38
236.6	-6235.61
236.4	-6458.8
236.2	-6679.09
236	-6911.99
235.8	-7155.91
235.6	-7400.13
235.4	-7638.27
235.2	-7858.29
235	-8086.11
234.8	-8307.47
234.6	-8522.41
234.4	-8750.28
234.2	-9012.44
234	-9288.41
233.8	-9594.43
233.6	-9896.31
233.4	-10187.2
233.2	-10470.1
233	-10748.5
232.8	-11049.1
232.6	-11349
232.4	-11672
232.2	-12012.3
232	-12349.1
231.8	-12688
231.6	-13016
231.4	-13361.9
231.2	-13733.4
231	-14095
230.8	-14441.7
230.6	-14762
230.4	-15085.6
230.2	-15403.3
230	-15730
229.8	-16046.2
229.6	-16367.3
229.4	-16684.1
229.2	-17024.7
229	-17322.9
228.8	-17612.1
228.6	-17904.6
228.4	-18228
228.2	-18561.3
228	-18912.8
227.8	-19250.8
227.6	-19565.7
227.4	-19842
227.2	-20118.1
227	-20393.9
226.8	-20689.6
226.6	-20946.7
226.4	-21229.7
226.2	-21513.3
226	-21804.1
225.8	-22075.7
225.6	-22342.2
225.4	-22589.8
225.2	-22821.7
225	-23048.4
224.8	-23242
224.6	-23380.4
224.4	-23547.5
224.2	-23755.7
224	-23955.6
223.8	-24131.1
223.6	-24294.2
223.4	-24450.9
223.2	-24601.2
223	-24742.3
222.8	-24875.7
222.6	-24981.8
222.4	-25035.6
222.2	-25061.6
222	-25089.5
221.8	-25118.4
221.6	-25194.9
221.4	-25274.8
221.2	-25310.8
221	-25379.9
220.8	-25462.3
220.6	-25503.8
220.4	-25557.3
220.2	-25573.4
220	-25566.8
219.8	-25669.1
219.6	-25748.8
219.4	-25817.3
219.2	-25898.8
219	-25980.4
218.8	-26071.8
218.6	-26178
218.4	-26198.4
218.2	-26173.6
218	-26186.2
217.8	-26255.2
217.6	-26189.4
217.4	-26078.8
217.2	-25980.5
217	-25878.4
216.8	-25924
216.6	-25827.3
216.4	-25597.7
216.2	-25395.1
216	-25229.9
215.8	-25092.2
215.6	-25038.4
215.4	-25051.5
215.2	-24994.5
215	-24985.6
214.8	-24954.8
214.6	-24893.7
214.4	-24751.5
214.2	-24722.2
214	-24803.3
213.8	-24891.9
213.6	-25001
213.4	-25028.7
213.2	-25087.4
213	-25201.4
212.8	-25326
212.6	-25404.2
212.4	-25442
212.2	-25409.7
212	-25390.5
211.8	-25477.7
211.6	-25589.3
211.4	-25672
211.2	-25925
211	-26228.3
210.8	-26518.9
210.6	-26703.5
210.4	-26905
210.2	-26951.3
210	-27094.3
209.8	-27374.8
209.6	-27701.6
209.4	-27915.4
209.2	-28055
209	-28330.8
208.8	-28476.7
208.6	-28658.4
208.4	-28934.3
208.2	-29038.8
208	-29261.5
207.8	-29265.7
207.6	-29385.2
207.4	-29562.5
207.2	-29663.3
207	-29710.9
206.8	-29846.3
206.6	-29876.1
206.4	-30044.8
206.2	-30020.5
206	-30199.9
205.8	-30327.7
205.6	-30139.6
205.4	-29865.9
205.2	-29768.3
205	-29806.1
204.8	-29581.4
204.6	-29058.3
204.4	-28373.7
204.2	-27399.8
204	-26446.5
203.8	-25914.7
203.6	-25436.1
203.4	-23863.2
203.2	-22076.6
203	-20130.7
202.8	-19201.5
202.6	-18034.3
202.4	-17075.2
202.2	-16041.4
202	-14910.1
201.8	-11548.2
201.6	-8748.23
201.4	-7880.63
201.2	-7689.14
201	-7021.35
200.8	-6040.37
200.6	-4014.37
200.4	-2537.27
200.2	-1240.51
200	-915.661
