# Supplementary material for: Redox regulation of KV7 channels through EF3 hand of calmodulin
Source: eLife. 2023 Feb 20;12:e81961. doi: 10.7554/eLife.81961 (PMC9988260; doi:10.7554/eLife.81961)
Supplement: Figure 4—figure supplement 2—source data 1. [file elife-81961-fig4-figsupp2-data1.xlsx]

## Sheet: SUMMARY
	KCNQ1 APO			KCNQ1 HOLO						KCNQ3 APO			KCNQ3 HOLO					KCNQ4 APO			KCNQ4 HOLO					KCNQ5 APO			KCNQ4 HOLO
Peptide S2S3	Q1 A	Q1 B	Q1 C	Q1 A	Q1 B	Q1 C	Peptide S2S3		S2S3 uM	Q3 A	Q3 B	Q3 C	Q3 A	Q3 B	Q3 C		S2S3 uM	Q4 A	Q4 B	Q4 C	Q4 A	Q4 B	Q4 C		S2S3 uM	Q5 A	Q5 B	Q5 C	Q5 A	Q5 B	Q5 C
0	96.5	105.44	98.8	201.42	200.24	202.11	0		0	103.7	98.34	97.14	203.45	200.77	201.65		0	95.12	96.78	102.51	198.46	184.63	203.61		0	101.32	95.41	98.49	201.21	189.45	197.12
0.1	134.13	140.12	134.18	258.01	262.55	253.54	0.5		0.1	144.22	155.14	140.25	237.78	231.32	224.63		0.5	170.85	205.11	210.73	259.12	244.63	264.12		0.25	130.41	112.45	120.68	218.36	210.1	215.72
0.25	140.95	150.32	142.51	293.58	296.69	297.62	1		0.25	150.81	170.59	175.64	259.16	256.98	236.21		1	220.15	220.14	234.22	294.69	256.17	285.33		0.5	166.85	149.33	153.01	252.47	238.78	250.69
0.5	159.73	175.4	168.86	355.91	326.01	320.28	2		0.5	168.18	180.63	190.12	279.78	271.25	251.17		2	240.21	232.47	260.46	322.73	281.17	326.65		1	189.84	164.23	174.2	316.09	292.39	304.38
0.75	176.73	219	193.62	383.02	348.96	344.05	4		0.75	180.44	190.45	210.54	294.45	310.51	284.96		4	250.36	248.65	289.08	340.58	299.31	347.74		2	220.21	201.02	215.23	328.94	304.83	321.34
1	210.71	228.01	209.76	392.65	362.12	362.28	8		1	215.15	205.14	220.74	318.23	351.98	312.98		8	270.14	258.33	290.15	348.01	323.87	364.13		4	251.9	224.96	228.65	332.51	311.22	323.51
2	231.66	235.35	223.6	394.77	374.37	370.67	12		2	240.78	215.89	252.3	366.96	377.32	330.7		16	272.65	259.79	293.23	352.47	333.64	368.11		8	263.46	235.57	241.17	337.04	312.17	325.74
4	242.11	256.89	244.15	394.84	376.28	372.78	16		4	270.46	230.45	260.14	408.61	442.63	392.63		32	273.14	260.05	294.71	354.59	334.02	370.21		16	266.55	237.49	245.38	341.25	315.04	327.99
8	276.57	293	273.78						8	280.15	240.14	265.85	427.41	443.89	433.61
16	275.85	298.47	281						16	282.64	245.25	267.92	431.23	443.27	447.91
32	297.21	296.33	290.4						32	284.95	248.39	269.91	432.47	444.03	448.03
Q1 S2S3 D-CaM normalized									Q3 S2S3 D-CaM normalized								Q4 S2S3 D-CaM normalized								Q5 S2S3 D-CaM normalized
Peptide S2S3	APO			Peptide S2S3	HOLO				S2S3 uM	APO			HOLO				S2S3 uM	APO			HOLO				S2S3 uM	APO			HOLO
0	0	0	0	0	0	0	0		0	0	0	0	0	0	0		0	0	0	0	0	0	0		0	0	0	0	0	0	0
0.1	38.9948	32.8907	35.8097	0.5	28.0955	31.1177	25.4465		0.1	39.0743	57.7588	44.3792	16.8739	15.2164	11.396		0.5	79.6152	111.934	105.57	30.5654	32.4974	29.7186		0.25	28.711	17.8598	22.5302	8.52343	10.9	9.43588
0.25	46.0622	42.5645	44.2409	1	45.7551	48.1672	47.2564		0.25	45.4291	73.4696	80.8112	27.3826	27.9972	17.1386		1	131.444	127.464	128.485	48.4884	38.7478	40.1356		0.5	64.6763	56.514	55.3559	25.4759	26.0385	27.1763
0.5	65.5233	66.3505	70.9109	2	76.7004	62.8096	58.4682		0.5	62.1794	83.6791	95.7175	37.5178	35.1048	24.5574		2	152.534	140.205	154.083	62.6172	52.2884	60.4293		1	87.3668	72.1308	76.8707	57.0946	54.3362	54.4136
0.75	83.1399	107.701	95.9717	4	90.1599	74.2709	70.2291		0.75	74.0019	93.6648	116.739	44.7284	54.6596	41.3142		4	163.204	156.923	182.002	71.6114	62.1134	70.7873		2	117.341	110.691	118.53	63.4809	60.9026	63.0175
1	118.352	116.246	112.308	8	94.9409	80.843	79.2489		1	107.473	108.603	127.239	56.4168	75.315	55.2095		8	183.999	166.925	183.046	75.3552	75.4157	78.837		4	148.618	135.782	132.156	65.2552	64.2755	64.1183
2	140.062	123.208	126.316	12	95.9934	86.9606	83.4001		2	132.189	119.534	159.728	80.3686	87.9364	63.997		16	186.638	168.434	186.05	77.6025	80.7074	80.7917		8	160.028	146.903	144.867	67.5066	64.777	65.2496
4	150.891	143.636	147.115	16	96.0282	87.9145	84.4441		4	160.81	134.34	167.799	100.841	120.466	94.7087		32	187.153	168.702	187.494	78.6708	80.9132	81.8231		16	163.077	148.915	149.142	69.5989	66.2919	66.391
8	186.601	177.883	177.105						8	170.154	144.194	173.677	110.081	121.094	115.031
16	185.855	183.071	184.413						16	172.555	149.39	175.808	111.959	120.785	122.122
32	207.99	181.041	193.927						32	174.783	152.583	177.857	112.568	121.164	122.182
STATISTICS
KCNQ1 APO								KCNQ1 HOLO
Peptide S2S3	Size	Missing	Mean	Std Dev	Std. Error	C.I. of Mean		Peptide S2S3	Size	Missing	Mean	Std Dev	Std. Error	C.I. of Mean
0	3	0	0	0	0	0		0	3	0	0	0	0	0
0.1	3	0	35.898	3.053	1.763	7.584		0.5	3	0	28.22	2.838	1.638	7.049
0.25	3	0	44.289	1.749	1.01	4.346		1	3	0	47.06	1.218	0.703	3.026
0.5	3	0	67.595	2.901	1.675	7.207		2	3	0	65.993	9.524	5.499	23.658
0.75	3	0	95.604	12.285	7.093	30.517		4	3	0	78.22	10.536	6.083	26.173
1	3	0	115.635	3.068	1.771	7.622		8	3	0	85.011	8.636	4.986	21.454
2	3	0	129.862	8.969	5.179	22.281		12	3	0	88.785	6.492	3.748	16.127
4	3	0	147.214	3.629	2.095	9.014		16	3	0	89.462	5.945	3.432	14.768
8	3	0	180.53	5.272	3.044	13.097
16	3	0	184.446	1.392	0.804	3.459
32	3	0	194.319	13.478	7.782	33.482
KCNQ3 APO								KCNQ3 HOLO
S2S3 uM	Size	Missing	Mean	Std Dev	Std. Error	C.I. of Mean		S2S3 uM	Size	Missing	Mean	Std Dev	Std. Error	C.I. of Mean
0	3	0	0	0	0	0		0	3	0	0	0	0	0
0.1	3	0	47.071	9.629	5.559	23.919		0.1	3	0	14.495	2.809	1.622	6.979
0.25	3	0	66.57	18.673	10.781	46.386		0.25	3	0	24.173	6.1	3.522	15.152
0.5	3	0	80.525	16.99	9.809	42.206		0.5	3	0	32.393	6.893	3.979	17.122
0.75	3	0	94.802	21.391	12.35	53.138		0.75	3	0	46.901	6.933	4.003	17.222
1	3	0	114.438	11.1	6.409	27.574		1	3	0	62.314	11.276	6.51	28.01
2	3	0	137.151	20.551	11.865	51.052		2	3	0	77.434	12.237	7.065	30.397
4	3	0	154.316	17.649	10.19	43.844		4	3	0	105.338	13.455	7.768	33.424
8	3	0	162.675	16.102	9.296	40		8	3	0	115.402	5.516	3.184	13.702
16	3	0	165.918	14.406	8.317	35.786		16	3	0	118.289	5.523	3.188	13.719
32	3	0	168.408	13.79	7.962	34.257		32	3	0	118.638	5.281	3.049	13.119
KCNQ4 APO								KCNQ4 HOLO
S2S3 uM	Size	Missing	Mean	Std Dev	Std. Error	C.I. of Mean		S2S3 uM	Size	Missing	Mean	Std Dev	Std. Error	C.I. of Mean
0	3	0	0	0	0	0		0	3	0	0	0	0	0
0.5	3	0	99.04	17.121	9.885	42.53		0.5	3	0	30.927	1.424	0.822	3.538
1	3	0	129.131	2.067	1.194	5.135		1	3	0	42.457	5.269	3.042	13.089
2	3	0	148.94	7.605	4.391	18.891		2	3	0	58.445	5.443	3.142	13.521
4	3	0	167.376	13.05	7.534	32.417		4	3	0	68.171	5.262	3.038	13.071
8	3	0	177.99	9.594	5.539	23.834		8	3	0	76.536	1.993	1.151	4.951
16	3	0	180.374	10.345	5.973	25.698		16	3	0	79.701	1.817	1.049	4.515
32	3	0	181.116	10.752	6.208	26.71		32	3	0	80.469	1.622	0.937	4.03
KCNQ5 APO								KCNQ5 HOLO
S2S3 uM	Size	Missing	Mean	Std Dev	Std. Error	C.I. of Mean		S2S3 uM	Size	Missing	Mean	Std Dev	Std. Error	C.I. of Mean
0	3	0	0	0	0	0		0	3	0	0	0	0	0
0.25	3	0	23.034	5.443	3.143	13.521		0.25	3	0	9.62	1.199	0.692	2.978
0.5	3	0	58.849	5.08	2.933	12.619		0.5	3	0	26.23	0.866	0.5	2.152
1	3	0	78.789	7.797	4.502	19.369		1	3	0	55.281	1.571	0.907	3.902
2	3	0	115.521	4.225	2.439	10.495		2	3	0	62.467	1.374	0.794	3.414
4	3	0	138.852	8.65	4.994	21.488		4	3	0	64.55	0.616	0.356	1.53
8	3	0	150.599	8.228	4.751	20.44		8	3	0	65.844	1.459	0.842	3.624
16	3	0	153.712	8.112	4.683	20.151		16	3	0	67.427	1.881	1.086	4.674

## Sheet: Q1 D-CaM spectra
450	1	2	1		450	1	2	1		450	2	2	1
451	1	2	2		451	2	2	2		451	3	2	2
452	2	3	2		452	2	3	2		452	4	3	3
453	2	2	4		453	3	3	3		453	3	4	4
454	2	3	5		454	1	3	4		454	2	5	5
455	2	4	7		455	3	4	5		455	2	6	8
456	2	6	10		456	3	6	10		456	2	8	10
457	2	6	12		457	3	7	14		457	3	5	12
458	2	8	20		458	3	9	18		458	2	8	14
459	2	13	25		459	3	8	22		459	2	10	14
460	2	16	33		460	3	11	26		460	5	18	26
461	6	24	39		461	5	21	36		461	5	21	42
462	5	36	55		462	6	28	56		462	5	29	62
463	8	50	92		463	7	38	96		463	9	45	86
464	8	72	146		464	16	62	148		464	11	51	112
465	21	159	198		465	12	80	206		465	19	88	166
466	28	223	295		466	23	125	316		466	24	125	278
467	42	310	399		467	38	159	442		467	39	189	352
468	47	393	521		468	50	255	586		468	53	285	496
469	94	541	736		469	69	304	716		469	73	346	664
470	90	650	931		470	101	398	948		470	95	443	842
471	126	827	1174		471	120	506	1172		471	127	555	1090
472	159	1008	1401		472	160	625	1442		472	166	658	1280
473	201	1125	1670		473	197	743	1670		473	197	818	1554
474	233	1327	1908		474	226	849	1954		474	251	973	1714
475	280	1499	2103		475	265	953	2236		475	275	1110	2012
476	310	1683	2371		476	306	1082	2404		476	323	1242	2286
477	350	1795	2572		477	352	1198	2672		477	389	1338	2432
478	397	1996	2807		478	398	1267	2878		478	422	1506	2650
479	434	2077	2911		479	399	1369	3054		479	470	1581	2804
480	469	2216	3124		480	458	1502	3182		480	499	1682	3076
481	481	2290	3216		481	490	1545	3370		481	536	1774	3084
482	553	2337	3244		482	538	1571	3440		482	578	1842	3202
483	559	2487	3324		483	562	1738	3496		483	608	1918	3462
484	615	2502	3484		484	594	1761	3614		484	634	2008	3392
485	662	2546	3441		485	603	1840	3646		485	662	2005	3420
486	656	2576	3499		486	661	1865	3714		486	661	2106	3480
487	687	2686	3556		487	704	1873	3738		487	723	2134	3590
488	706	2682	3543		488	728	1934	3766		488	769	2192	3654
489	747	2688	3518		489	727	1868	3792		489	808	2216	3604
490	770	2801	3578		490	730	1946	3802		490	835	2250	3572
491	789	2757	3567		491	758	1995	3808		491	878	2274	3610
492	816	2715	3645		492	795	2023	3830		492	905	2315	3670
493	846	2729	3543		493	841	2051	3868		493	889	2371	3634
494	850	2810	3543		494	854	2013	3910		494	918	2434	3592
495	901	2781	3606		495	866	2012	3898		495	909	2414	3504
496	923	2813	3559		496	907	2103	3904		496	911	2408	3684
497	953	2775	3489		497	897	2088	3870		497	974	2477	3550
498	964	2776	3538		498	922	2078	3802		498	1002	2464	3510
499	949	2764	3489		499	936	2107	3822		499	1055	2435	3610
500	948	2741	3426		500	929	2038	3778		500	1046	2432	3504
501	949	2759	3391		501	962	2019	3708		501	1044	2374	3370
502	979	2697	3337		502	945	2040	3626		502	1057	2434	3454
503	939	2640	3236		503	935	2035	3564		503	1046	2422	3318
504	973	2644	3194		504	956	1984	3574		504	1084	2379	3368
505	991	2591	3103		505	975	1976	3462		505	1083	2365	3202
506	981	2563	3054		506	957	1927	3380		506	1049	2352	3212
507	995	2494	3018		507	957	1935	3348		507	1065	2290	3022
508	1005	2468	2955		508	990	1877	3188		508	1055	2269	2862
509	982	2461	2807		509	965	1856	3190		509	1083	2269	2912
510	1022	2430	2797		510	985	1873	3062		510	1027	2261	2788
511	986	2374	2778		511	939	1830	3062		511	1088	2235	2822
512	1008	2313	2686		512	958	1791	2970		512	1022	2168	2762
513	1033	2302	2654		513	982	1776	2958		513	1089	2208	2706
514	1024	2308	2615		514	991	1758	2912		514	1072	2184	2674
515	1027	2230	2533		515	986	1739	2892		515	1033	2096	2596
516	1019	2218	2534		516	1000	1721	2842		516	1077	2104	2580
517	979	2230	2417		517	990	1750	2758		517	1085	2123	2580
518	1024	2204	2422		518	959	1700	2784		518	1079	2107	2416
519	1055	2181	2350		519	1013	1647	2720		519	1055	2112	2434
520	1054	2161	2312		520	1010	1662	2744		520	1092	2048	2372
521	1027	2093	2252		521	1022	1641	2656		521	1067	2034	2346
522	1060	2065	2229		522	1013	1606	2568		522	1052	2003	2310
523	1076	2060	2187		523	993	1596	2578		523	1120	1960	2180
524	1008	2046	2174		524	998	1584	2430		524	1060	2002	2130
525	1031	1976	2098		525	1007	1549	2476		525	1081	1907	2128
526	1001	1973	2015		526	1003	1511	2360		526	1076	1850	2020
527	1000	1936	2028		527	976	1504	2348		527	1079	1896	2124
528	1008	1925	1971		528	977	1471	2314		528	1037	1869	1932
529	966	1850	1908		529	986	1459	2262		529	1074	1798	2018
530	1015	1892	1937		530	961	1434	2140		530	1041	1765	1958
531	1025	1817	1821		531	959	1392	2258		531	1124	1768	1870
532	1016	1773	1787		532	927	1410	2122		532	1053	1768	1764
533	937	1735	1791		533	967	1403	2004		533	1020	1715	1766
534	975	1710	1717		534	935	1363	2084		534	1052	1698	1782
535	977	1722	1669		535	924	1342	1984		535	995	1680	1726
536	936	1671	1594		536	916	1350	1952		536	1028	1646	1692
537	960	1660	1620		537	912	1283	1918		537	992	1627	1698
538	899	1565	1512		538	903	1275	1880		538	982	1581	1630
539	927	1575	1528		539	886	1236	1828		539	979	1595	1590
540	890	1519	1441		540	856	1207	1766		540	1004	1542	1548
541	920	1500	1440		541	892	1199	1734		541	943	1491	1412
542	894	1513	1396		542	814	1147	1660		542	984	1488	1436
543	795	1429	1346		543	863	1151	1650		543	963	1461	1332
544	865	1407	1370		544	847	1113	1572		544	899	1418	1376
545	842	1393	1330		545	818	1070	1552		545	922	1368	1320
546	868	1349	1293		546	816	1083	1502		546	906	1357	1286
547	818	1228	1235		547	786	1059	1478		547	874	1325	1246
548	813	1224	1209		548	783	1002	1488		548	917	1245	1214
549	808	1213	1128		549	760	1037	1426		549	885	1234	1218
550	794	1031	1025		550	786	963	1344		550	861	1270	1162

## Sheet: Q3 D-CaM spectra
450	2	2	1		450	1	2	6
451	3	2	2		451	2	2	6
452	4	3	2		452	2	3	5
453	3	2	4		453	3	3	6
454	2	3	5		454	1	3	4
455	2	4	7		455	3	4	8
456	2	6	10		456	3	6	8
457	3	6	12		457	3	7	9
458	2	8	20		458	3	9	15
459	2	13	25		459	3	8	14
460	5	16	33		460	3	11	29
461	5	24	39		461	5	21	39
462	5	36	55		462	6	28	50
463	9	50	92		463	7	38	78
464	11	72	146		464	16	62	113
465	19	159	198		465	12	80	174
466	24	223	295		466	23	125	241
467	39	310	399		467	38	159	337
468	53	393	521		468	50	255	456
469	73	541	736		469	69	304	575
470	95	650	931		470	101	398	779
471	127	827	1174		471	120	506	999
472	166	1008	1401		472	160	625	1250
473	197	1125	1670		473	197	743	1458
474	251	1327	1908		474	226	849	1764
475	275	1499	2103		475	265	953	1997
476	323	1683	2371		476	306	1082	2225
477	389	1795	2572		477	352	1198	2495
478	422	1996	2807		478	398	1267	2682
479	470	2077	2911		479	399	1369	2850
480	499	2216	3124		480	458	1502	2978
481	536	2290	3216		481	490	1545	3141
482	578	2337	3244		482	538	1571	3331
483	608	2487	3324		483	562	1738	3401
484	634	2502	3484		484	594	1761	3412
485	662	2546	3441		485	603	1840	3455
486	661	2576	3499		486	661	1865	3590
487	723	2686	3556		487	704	1873	3566
488	769	2682	3543		488	728	1934	3645
489	808	2688	3518		489	727	1868	3658
490	835	2801	3578		490	730	1946	3694
491	878	2757	3567		491	758	1995	3672
492	905	2715	3645		492	795	2023	3645
493	889	2729	3543		493	841	2051	3726
494	918	2810	3543		494	854	2013	3713
495	909	2781	3606		495	866	2012	3652
496	911	2813	3559		496	907	2103	3671
497	974	2775	3489		497	897	2088	3699
498	1002	2776	3538		498	922	2078	3602
499	1055	2764	3489		499	936	2107	3609
500	1046	2741	3426		500	929	2038	3550
501	1044	2759	3391		501	962	2019	3437
502	1057	2697	3337		502	945	2040	3519
503	1046	2640	3236		503	935	2035	3403
504	1084	2644	3194		504	956	1984	3396
505	1083	2591	3103		505	975	1976	3320
506	1049	2563	3054		506	957	1927	3167
507	1065	2494	3018		507	957	1935	3101
508	1055	2468	2955		508	990	1877	3059
509	1083	2461	2807		509	965	1856	2986
510	1027	2430	2797		510	985	1873	3009
511	1088	2374	2778		511	939	1830	2922
512	1022	2313	2686		512	958	1791	2840
513	1089	2302	2654		513	982	1776	2777
514	1072	2308	2615		514	991	1758	2686
515	1033	2230	2533		515	986	1739	2643
516	1077	2218	2534		516	1000	1721	2617
517	1085	2230	2417		517	990	1750	2614
518	1079	2204	2422		518	959	1700	2547
519	1055	2181	2350		519	1013	1647	2489
520	1092	2161	2312		520	1010	1662	2493
521	1067	2093	2252		521	1022	1641	2390
522	1052	2065	2229		522	1013	1606	2316
523	1120	2060	2187		523	993	1596	2278
524	1060	2046	2174		524	998	1584	2295
525	1081	1976	2098		525	1007	1549	2266
526	1076	1973	2015		526	1003	1511	2166
527	1079	1936	2028		527	976	1504	2193
528	1037	1925	1971		528	977	1471	2076
529	1074	1850	1908		529	986	1459	2095
530	1041	1892	1937		530	961	1434	2011
531	1124	1817	1821		531	959	1392	1990
532	1053	1773	1787		532	927	1410	1972
533	1020	1735	1791		533	967	1403	1904
534	1052	1710	1717		534	935	1363	1812
535	995	1722	1669		535	924	1342	1849
536	1028	1671	1594		536	916	1350	1762
537	992	1660	1620		537	912	1283	1758
538	982	1565	1512		538	903	1275	1671
539	979	1575	1528		539	886	1236	1634
540	1004	1519	1441		540	856	1207	1593
541	943	1500	1440		541	892	1199	1561
542	984	1513	1396		542	814	1147	1513
543	963	1429	1346		543	863	1151	1463
544	899	1407	1370		544	847	1113	1493
545	922	1393	1330		545	818	1070	1454
546	906	1349	1293		546	816	1083	1413
547	874	1228	1235		547	786	1059	1358
548	917	1224	1209		548	783	1002	1363
549	885	1213	1128		549	760	1037	1274
550	861	1031	1025		550	786	963	1217

## Sheet: Q4 D-CaM spectra
450	2	4	4		450	1	4	3
451	2	2	4		451	1	4	4
452	2	4	6		452	1	4	6
453	3	2	7		453	1	2	4
454	3	2	10		454	3	8	4
455	3	5	13		455	1	4	4
456	3	6	11		456	2	2	9
457	3	4	14		457	3	5	9
458	3	6	17		458	1	8	11
459	2	8	23		459	2	8	16
460	4	14	27		460	5	12	16
461	4	17	41		461	3	14	33
462	4	22	53		462	10	23	38
463	7	35	76		463	7	31	58
464	15	41	107		464	15	47	81
465	21	70	157		465	18	60	134
466	29	99	222		466	30	95	200
467	39	149	326		467	35	140	241
468	59	225	454		468	54	194	366
469	76	273	564		469	66	278	475
470	96	351	799		470	95	351	646
471	130	438	977		471	119	425	779
472	157	520	1170		472	167	533	980
473	198	646	1430		473	179	647	1161
474	246	769	1649		474	230	791	1391
475	276	877	1931		475	256	901	1524
476	336	982	2122		476	289	1017	1660
477	394	1058	2274		477	338	1178	1881
478	422	1190	2550		478	401	1216	2003
479	464	1250	2619		479	408	1371	2203
480	473	1328	2798		480	460	1423	2369
481	582	1402	2962		481	498	1563	2436
482	563	1456	3041		482	536	1636	2625
483	617	1516	3210		483	554	1694	2659
484	656	1587	3242		484	608	1805	2718
485	686	1585	3199		485	635	1813	2804
486	724	1664	3287		486	640	1823	2813
487	742	1687	3285		487	663	1917	2923
488	757	1733	3284		488	722	1940	2836
489	772	1751	3401		489	699	1951	2923
490	852	1777	3433		490	711	2059	2949
491	864	1796	3349		491	800	2051	2996
492	878	1830	3426		492	784	2033	2986
493	931	1875	3362		493	807	2088	3069
494	933	1924	3379		494	802	2155	2961
495	994	1908	3296		495	851	2124	3034
496	970	1903	3317		496	871	2150	3020
497	1025	1958	3290		497	908	2059	3028
498	1060	1948	3281		498	880	2179	3025
499	1029	1924	3359		499	920	2141	2873
500	1047	1923	3163		500	898	2159	3000
501	1075	1877	3168		501	937	2151	2868
502	1069	1924	3112		502	923	2188	2923
503	1104	1914	3048		503	904	2147	2853
504	1076	1881	2979		504	976	2124	2783
505	1081	1869	2901		505	936	2068	2693
506	1102	1859	2886		506	951	1986	2731
507	1068	1810	2800		507	978	2057	2663
508	1081	1793	2716		508	927	2017	2629
509	1051	1793	2678		509	958	1939	2569
510	1092	1787	2732		510	934	2029	2489
511	1057	1766	2614		511	918	1916	2491
512	1080	1713	2599		512	959	1950	2449
513	1071	1745	2517		513	967	1899	2434
514	1063	1727	2472		514	982	1883	2406
515	1054	1657	2460		515	964	1899	2289
516	1066	1662	2431		516	965	1908	2250
517	1088	1677	2322		517	982	1858	2284
518	1054	1665	2244		518	952	1852	2264
519	1065	1669	2273		519	969	1860	2255
520	1091	1620	2223		520	957	1816	2154
521	1092	1607	2150		521	937	1760	2123
522	1083	1583	2133		522	978	1810	2131
523	1078	1550	2107		523	988	1766	2046
524	1079	1582	2076		524	972	1714	2043
525	1069	1508	2070		525	971	1667	2010
526	1092	1462	1992		526	958	1706	1975
527	1025	1498	1905		527	960	1672	1895
528	1026	1476	1923		528	978	1649	1829
529	1030	1421	1863		529	938	1561	1853
530	1046	1396	1827		530	913	1545	1843
531	1006	1398	1694		531	918	1585	1740
532	1022	1398	1761		532	887	1544	1754
533	1013	1356	1663		533	875	1507	1636
534	959	1342	1630		534	896	1484	1648
535	979	1327	1605		535	894	1461	1640
536	986	1301	1562		536	888	1497	1621
537	959	1286	1530		537	867	1412	1540
538	976	1250	1490		538	865	1384	1514
539	966	1260	1464		539	863	1371	1475
540	914	1219	1398		540	866	1408	1446
541	939	1178	1381		541	836	1347	1444
542	924	1177	1368		542	837	1292	1336
543	890	1154	1280		543	840	1271	1326
544	900	1120	1182		544	823	1273	1354
545	882	1080	1240		545	781	1247	1266
546	868	1072	1201		546	777	1188	1254
547	851	1047	1207		547	785	1183	1195
548	833	984	1165		548	787	1144	1179
549	843	975	1104		549	792	1116	1146
550	813	1003	993		550	757	1126	1129

## Sheet: Q5 D-CaM spectra
450	1	1	2		450	2	1	2
451	1	2	2		451	2	1	2
452	1	2	2		452	2	1	2
453	2	4	2		453	2	1	3
454	2	4	2		454	2	1	6
455	2	4	3		455	2	1	6
456	2	6	6		456	2	2	7
457	2	7	6		457	2	2	12
458	3	7	6		458	3	3	15
459	1	6	12		459	2	6	26
460	4	11	14		460	4	7	31
461	4	15	18		461	4	8	40
462	4	19	26		462	4	11	57
463	6	24	43		463	6	19	97
464	12	43	59		464	14	26	134
465	18	60	127		465	19	96	198
466	24	81	195		466	26	136	266
467	33	134	283		467	36	204	363
468	50	186	390		468	54	283	510
469	64	231	525		469	70	363	631
470	80	303	671		470	88	487	845
471	109	417	813		471	119	630	1098
472	132	485	982		472	144	748	1316
473	165	573	1206		473	181	927	1520
474	206	740	1432		474	225	1028	1740
475	231	840	1526		475	253	1215	1993
476	281	913	1778		476	307	1318	2196
477	330	988	1892		477	361	1502	2402
478	353	1140	2135		478	386	1655	2724
479	388	1207	2264		479	424	1729	2796
480	396	1242	2328		480	433	1938	2926
481	487	1403	2460		481	533	1898	3124
482	471	1462	2611		482	515	1923	3133
483	516	1464	2656		483	565	2109	3159
484	549	1582	2735		484	600	2089	3318
485	574	1548	2737		485	627	2179	3329
486	606	1638	2822		486	662	2213	3359
487	620	1752	2920		487	678	2222	3309
488	633	1700	2949		488	692	2283	3443
489	646	1784	3009		489	706	2303	3357
490	712	1754	2958		490	779	2386	3390
491	723	1778	2929		491	790	2374	3403
492	734	1873	2994		492	803	2392	3260
493	778	1864	3003		493	851	2432	3368
494	781	1836	3090		494	853	2432	3307
495	831	1880	3092		495	909	2462	3379
496	811	1920	3026		496	887	2372	3285
497	857	1910	3006		497	937	2329	3368
498	887	1918	3057		498	969	2540	3179
499	861	1899	3052		499	941	2449	3267
500	876	1864	3055		500	957	2522	3192
501	899	1933	3035		501	983	2386	3060
502	894	1888	2959		502	977	2406	3060
503	923	1902	2973		503	1009	2400	3025
504	900	1911	2910		504	984	2309	2864
505	904	1875	2871		505	989	2356	2928
506	922	1797	2804		506	1008	2333	2840
507	893	1756	2789		507	977	2267	2794
508	904	1759	2822		508	989	2329	2713
509	879	1814	2695		509	961	2247	2574
510	913	1717	2715		510	998	2210	2631
511	884	1708	2712		511	967	2145	2528
512	903	1689	2669		512	988	2139	2416
513	895	1682	2579		513	979	2182	2323
514	889	1658	2583		514	972	2127	2343
515	881	1660	2530		515	964	2122	2288
516	892	1640	2511		516	975	2117	2246
517	910	1584	2490		517	995	2119	2200
518	881	1620	2508		518	964	2041	2152
519	891	1599	2379		519	974	2083	2134
520	912	1571	2367		520	997	2023	2108
521	913	1550	2379		521	998	2001	2017
522	906	1556	2313		522	990	1993	2077
523	901	1515	2245		523	985	2014	1958
524	903	1475	2303		524	987	1955	1879
525	894	1462	2187		525	977	1933	1863
526	913	1466	2206		526	998	1887	1804
527	857	1419	2145		527	937	1938	1773
528	858	1434	2192		528	938	1854	1661
529	862	1420	2135		529	942	1817	1674
530	875	1368	2069		530	957	1825	1652
531	841	1395	2029		531	920	1805	1661
532	854	1304	1975		532	934	1782	1591
533	847	1301	1914		533	926	1698	1547
534	802	1345	1933		534	877	1718	1410
535	819	1262	1908		535	895	1703	1467
536	824	1210	1943		536	901	1683	1439
537	802	1239	1781		537	877	1663	1399
538	816	1222	1792		538	893	1545	1410
539	808	1205	1726		539	883	1603	1329
540	764	1151	1695		540	836	1623	1236
541	786	1136	1722		541	859	1527	1239
542	773	1115	1653		542	845	1505	1168
543	745	1110	1543		543	814	1485	1151
544	753	1129	1592		544	823	1474	1148
545	738	1052	1497		545	807	1351	1153
546	726	1037	1467		546	793	1331	1071
547	712	1035	1474		547	778	1346	1069
548	697	923	1432		548	762	1303	1063
549	705	974	1401		549	771	1298	990
550	680	957	1401		550	744	1264	948
