# Supplementary material for: Redox regulation of KV7 channels through EF3 hand of calmodulin
Source: eLife. 2023 Feb 20;12:e81961. doi: 10.7554/eLife.81961 (PMC9988260; doi:10.7554/eLife.81961)
Supplement: Figure 4—figure supplement 3—source data 1. [file elife-81961-fig4-figsupp3-data1.xlsx]

## Sheet: Hoja1
FRET Ratio (sum526-530/sum491-495)							FRET Ratio (sum526-530/sum491-495)
Q2 EGTA	Q2 Ca	Q2 EGTA + S2S3	Q2 CA + S2S3	Q2 EGTA + S2S3 OXI	Q2 CA + S2S3 OX		Q4 EGTA	Q4 CA	Q4 EGTA + S2S3	Q4 CA + S2S3	Q4 EGTA + S2S3 OX	Q4 CA + S2S3 OX
1.71319	1.22946	1.72671	2.19855	1.56891	1.27403		1.61433	1.15082	1.64406	1.90518	1.61254	1.25478
1.71502	1.23259	1.70903	2.12667	1.51755	1.24449		1.57238	1.11867	1.6117	1.96548	1.60233	1.28966
1.71227	1.20703	1.72763	1.91135	1.60754	1.24223		1.59396	1.13214	1.62346	1.96456	1.62533	1.29866
1.7128	1.23159	1.71502	2.04463	1.58115	1.21659		1.58965	1.16526	1.67253	1.96854	1.58765	1.21245
1.71507	1.15113	1.7322	2.15452	1.61254	1.23543		1.59215	1.15325			1.59036	1.22535
	1.18188
	1.17269
EFFCIENCY	42.49*(LN(RATIO))+21.297
44.1717	30.0743	44.5057	54.7706	40.4336	31.5874		41.6463	27.2658	42.4216	48.6851	41.5992	30.9405
44.2171	30.1823	44.0686	53.3581	39.0195	30.5906		40.5277	26.0619	41.577	50.009	41.3293	32.1055
44.1491	29.2921	44.5285	48.8225	41.4673	30.5134		41.1068	26.5703	41.8858	49.9891	41.9347	32.4011
44.1622	30.148	44.2171	51.6865	40.764	29.6272		40.9918	27.7957	43.1513	50.0752	40.9383	29.4825
44.2184	27.2772	44.6407	53.911	41.5992	30.2801		41.0585	27.3553			41.0107	29.9322
	28.3973
	28.0658
	MEAN	STD ERROR		MEAN EFF	STD ERROR
Q2 EGTA	1.714	0.0006	Q2 EGTA	46.53	0.0136
Q2 CA	1.201	0.0124	Q2 CA	29.7	0.516
EGTA S2S3	1.722	0.0097	EGTA S2S3	46.727	0.101
CA + S23	2.087	0.0506	CA + S23	53.263	0.743
EGTA S2S3 OX	1.581	0.017	EGTA S2S3 OX	42.977	0.491
CA S2S3 OX	1.242	0.00927	CA S2S3 OX	31.414	0.374
Q4 EGTA	1.592	0.0068	Q4 EGTA	43.416	0.185
Q4 CA	1.144	0.00827	Q4 CA	27.303	0.355
Q4 EGTA S2S3	1.638	0.0133	Q4 EGTA S2S3	44.636	0.347
Q4 CA S2S3	1.951	0.0153	Q4 CA S2S3	51.282	0.263
Q4 EGTA S2S3 OX	1.604	0.00701	Q4 EGTA S2S3 OX	43.722	0.191
Q4 CA S2S3 CA	1.256	0.017	Q4 CA S2S3 CA	31.952	0.68
46.519	30.8895	46.8351	54.7907	42.7519	32.6762	44.0161	27.5962	44.8058	50.4941	43.9674	31.9127
46.5615	31.0159	46.4194	53.9006	41.2322	31.4985	42.852	26.2136	43.9457	51.5327	43.6892	33.2916
46.4977	29.9641	46.856	50.6051	43.8315	31.4055	43.4601	26.793	44.2632	51.5178	44.3113	33.6408
46.5095	30.9752	46.5615	52.764	43.1018	30.3607	43.3404	28.2141	45.5295	51.582	43.2845	30.1916
46.5639	27.609	46.9622	54.2558	43.9674	31.1298	43.41	27.6988			43.3599	30.7219
	28.9158
	28.5277
