# Supplementary material for: Redox regulation of KV7 channels through EF3 hand of calmodulin
Source: eLife. 2023 Feb 20;12:e81961. doi: 10.7554/eLife.81961 (PMC9988260; doi:10.7554/eLife.81961)
Supplement: Figure 4—source data 1. — Tabulated contact maps between calmodulin and Kv7.1 S2S3, and tabulated distance between S2S3 and EF3 mass centers. [file elife-81961-fig4-data1.xlsx]

## Sheet: Sheet1
Protein	Residue	- Calcium	+ Calcium
Kv7.2 CDR	10	0.063359	0.00252178
Kv7.2 CDR	11	0.000167774	0.00361944
Kv7.2 CDR	12	0.00248621	0.00586279
Kv7.2 CDR	13	0.00524896	0.00312547
Kv7.2 CDR	14	0.00340873	0.00190734
Kv7.2 CDR	16	0.00247989	0.00011284
Kv7.2 CDR	17	0.00357405	0.00100874
Kv7.2 CDR	18	0	0.00341303
Kv7.2 CDR	19	0.0011685	0.000710869
Kv7.2 CDR	20	0.016957	0.00151623
Kv7.2 CDR	21	0.0132749	0.000708842
Kv7.2 CDR	22	0.00940336	0
Kv7.2 CDR	23	0.00212077	0.00638411
Kv7.2 CDR	24	0.0289218	0.000255489
Kv7.2 CDR	25	0.0123031	0.00770482
Kv7.2 CDR	26	0.0018801	0.000334573
Kv7.2 CDR	310	0.00327115	0.00190717
Kv7.2 CDR	311	0.00452311	0.000503202
Kv7.2 CDR	312	0.00579983	-0.000774293
Kv7.2 CDR	313	0.00538303	-0.00172859
Kv7.2 CDR	314	0.00408622	0.00141539
Kv7.2 CDR	315	0.00265334	0.00320799
Kv7.2 CDR	326	0	0.00267621
Kv7.2 CDR	327	0.00284833	0.00043617
Kv7.2 CDR	328	0.00207712	0
Kv7.2 CDR	329	0.0521734	0.0021055
Kv7.2 CDR	330	0.00567885	0.0010036
Kv7.2 CDR	331	0.0012602	0.00181799
Kv7.2 CDR	332	0.0117634	0.0102675
Kv7.2 CDR	333	0.0106325	0.0467649
Kv7.2 CDR	334	0.00582578	0.00809743
Kv7.2 CDR	336	0.0138508	0.00644819
Kv7.2 CDR	337	0.000613579	0.000631816
Kv7.2 CDR	338	0.00333848	0.00513363
Kv7.2 CDR	339	0.00037033	0.000444967
Kv7.2 CDR	340	0.00543232	0.000930949
Kv7.2 CDR	341	0.0164398	0.00820945
Kv7.2 CDR	342	0.00592349	0
Kv7.2 CDR	343	0.0106159	0.00197306
Kv7.2 CDR	344	0.00146428	0.00497612
Kv7.2 CDR	345	0.0212624	0.0104311
Kv7.2 CDR	346	0.0297026	0.00396729
Kv7.2 CDR	347	0.00767219	0.0123553
Kv7.2 CDR	348	0.00143336	0.00114935
Kv7.2 CDR	349	0.00208172	0.00407629
Kv7.2 CDR	350	0.00642901	0.00149114
Kv7.2 CDR	351	0.00501107	0.00865669
Kv7.2 CDR	352	0.00803799	0.0069839
Kv7.2 CDR	353	0.00306034	0.00430144
Kv7.2 CDR	354	0.00742307	0.00501572
Kv7.2 CDR	355	0.00412773	0.00310628
Kv7.2 CDR	356	0.00659635	0.0061732
Kv7.2 CDR	357	NaN	0
Kv7.2 CDR	359	0.0121559	0
Kv7.2 CDR	361	0	0.00379833
Kv7.2 CDR	362	0.00529358	0.000779861
Kv7.2 CDR	363	0.0175978	0.00712844
Kv7.2 CDR	364	0	0.000667783
Kv7.2 CDR	365	0.00546503	0.00376099
Kv7.2 CDR	366	0.00615243	0.00170556
Kv7.2 CDR	367	0.0055715	0.00752822
Kv7.2 CDR	368	0.00472904	0.00266944
Kv7.2 CDR	369	0.00235751	0.00627407
Kv7.2 CDR	371	0.00292625	0.0040445
Kv7.2 CDR	372	0	0
Kv7.2 CDR	373	0.00636844	0.00669342
Kv7.2 CDR	392	0.0205022	0.00544978
Kv7.2 CDR	393	0.00969157	0.00215969
Kv7.2 CDR	502	0.000202605	0
Kv7.2 CDR	503	0	0.00114819
Kv7.2 CDR	504	0.00557366	0.00544638
Kv7.2 CDR	505	0.00659713	0.000829953
Kv7.2 CDR	507	0.00642033	0.00457323
Kv7.2 CDR	508	0.00463475	0.00071266
Kv7.2 CDR	509	0.00977559	0.00805413
Kv7.2 CDR	510	0.0158268	0
Kv7.2 CDR	511	0.00158199	0.00750725
Kv7.2 CDR	513	0.00751349	0.00709621
Kv7.2 CDR	514	0	0.00207482
Kv7.2 CDR	515	0.00597363	0.00218859
Kv7.2 CDR	516	0	0.00579083
Kv7.2 CDR	517	0.305414	0.00648062
Kv7.2 CDR	518	0.00604009	0.0530398
Kv7.2 CDR	519	0	0.00256724
Kv7.2 CDR	520	0.0414684	0.00221165
Kv7.2 CDR	521	0.0725387	0.0531838
Kv7.2 CDR	524	0.00621816	0.001324
Kv7.2 CDR	525	0.00296159	0.00585298
Kv7.2 CDR	526	0.00777092	0.00342743
Kv7.2 CDR	527	0.0253356	0.111341
Kv7.2 CDR	528	0.000712043	0.00857099
Kv7.2 CDR	529	0.00206618	0.00496456
Kv7.2 CDR	530	0.000164199	0.00157866
Kv7.2 CDR	531	0.00869344	0.00383247
Kv7.2 CDR	532	0.00155208	0.00239666
Kv7.2 CDR	548	0.00793486	0.0012177
Kv7.2 CDR	549	0.00302993	0.00389025
CaM	4	0.00761532	0.0078631
CaM	5	0.000608012	0.00443356
CaM	6	0.0132209	0.00762837
CaM	7	0.0171491	0.00479014
CaM	8	0.030035	0.00899987
CaM	9	0.00128543	0.0015419
CaM	10	0.0689688	0.00618711
CaM	11	0.000293435	0.00364195
CaM	12	0.00122686	0.0041946
CaM	13	0	0.00269872
CaM	14	0.00376049	0.00329313
CaM	15	0.0021647	0.0420865
CaM	16	0.013222	0.00092688
CaM	17	0.0131865	0.00339633
CaM	18	0.00452285	0.00266286
CaM	19	0.00498185	0.00663366
CaM	20	0.00425087	0.00363484
CaM	21	0.00663361	0.00801562
CaM	22	0.000345304	0.00270485
CaM	23	0.00632941	0.00086352
CaM	24	0.00173352	0.006398
CaM	25	0.000321204	0.00060672
CaM	26	0.00490926	0.00693735
CaM	27	0.000618606	0
CaM	28	0.0129454	0.00047236
CaM	29	0.00992878	0.000989499
CaM	30	0.00495198	0.00131604
CaM	31	0.000852183	0.00110297
CaM	32	0.0149086	0.00207208
CaM	33	0.00103873	0.0044621
CaM	34	0.00534352	0.00318558
CaM	35	0.00163905	0.00597524
CaM	36	0.00134235	0.00339021
CaM	37	0.00111077	0.00167448
CaM	38	0.000330696	0.00735004
CaM	39	0.0055997	0
CaM	40	0.00408446	0.00420889
CaM	41	0.00295706	2.00202e-05
CaM	42	0.00120885	0
CaM	43	0.00390048	0.00502157
CaM	45	0.0114321	0.00667318
CaM	46	0.0024732	0.00130938
CaM	47	0.00161822	0.00844952
CaM	48	0	0.00657491
CaM	49	0	0.0485411
CaM	50	0.00409864	0.0028162
CaM	51	0.00215144	0.0020597
CaM	52	0.00518853	0.00799834
CaM	53	0.00658133	0.00585311
CaM	54	0.00230728	0
CaM	55	0.00277721	0.00761818
CaM	56	0	0.00502814
CaM	57	0.0250095	0.000403493
CaM	58	0.0587171	0.0498084
CaM	59	0	0.00797827
CaM	60	0.00248978	0.00832849
CaM	61	0.0527502	0.000355247
CaM	62	0.00627365	0.00390798
CaM	63	0	0.00404274
CaM	64	0.0192765	0.0039171
CaM	65	0.0103703	0.00675007
CaM	66	0.000226674	0.00115761
CaM	68	0.00642879	0
CaM	69	0.00868823	0.00165842
CaM	70	0.0016129	0.00374462
CaM	71	0.00395297	0.0071575
CaM	72	0.00659781	0.00731334
CaM	73	0	0.0134947
CaM	74	0.0840507	0.0142162
CaM	75	0.00951582	0.0022332
CaM	76	0.0278633	0.0126034
CaM	77	0.0536985	0.010578
CaM	78	0.0109534	0.00513168
CaM	79	0.158111	0.00532588
CaM	80	0.0513469	0.0280222
CaM	81	0.0124828	0.139121
CaM	82	0.000253726	0.0228002
CaM	83	0.0167595	0.00668338
CaM	84	0.209494	0.00769471
CaM	86	0.200305	0.0561112
CaM	87	0.000700178	0
CaM	88	0.00104029	0.0187537
CaM	89	0.00600028	0.02095
CaM	90	0.00658333	0.0137677
CaM	91	0.0834457	0.00256079
CaM	92	0	0.0207987
CaM	93	0.17319	0
CaM	94	0.00114369	0.00383752
CaM	95	0.00452279	0.00310412
CaM	96	0.00309229	0.0353505
CaM	97	0.105102	0.00954994
CaM	98	0.00340678	0.00169546
CaM	99	0.208903	0.0424593
CaM	100	0.0148447	0.00270798
CaM	101	0.121877	0.00105534
CaM	102	0.00738576	0.0209272
CaM	103	0.165042	0.0782291
CaM	104	0.0253762	0.00524437
CaM	105	0.000338019	0
CaM	106	0.000404337	0.00640923
CaM	107	0.0877182	0.00677741
CaM	108	0.0139416	0.0173591
CaM	109	0.00260316	0.00564453
CaM	110	0.00854466	0.0246584
CaM	111	0.0285802	NaN
CaM	112	0.00424313	0.016963
CaM	113	0	0.00952636
CaM	114	0.00102031	0.00647451
CaM	115	0.00753569	NaN
CaM	116	0.0082086	0.0126474
CaM	117	0.0412357	0.0264389
CaM	118	0.00838232	0.0108054
CaM	119	0.00372656	0.00963935
CaM	120	0.010645	0.00116219
CaM	121	0.0104436	0.000235036
CaM	122	0.00167166	0.0687178
CaM	123	0.0192171	0.465384
CaM	124	0	0.00937264
CaM	125	0.0241816	0.00145025
CaM	126	0.0113927	0.0220865
CaM	127	0.00125987	0.006155
CaM	128	0.00826637	0.00520878
CaM	129	0.0183778	0.0103679
CaM	130	0.00341981	0.03428
CaM	131	0.160925	NaN
CaM	132	0.0669801	NaN
CaM	133	0.0474703	-0.0115372
CaM	134	0	0.0181618
CaM	136	0	NaN
CaM	137	0.0104169	NaN
CaM	138	0.00340014	NaN
CaM	139	0.131641	NaN
CaM	140	0	0.024126
CaM	141	0.0106253	0.0183708
CaM	142	0.00844764	0.0682271
CaM	143	0.0249901	0
CaM	144	0.132919	0.00895775
CaM	145	0.0363814	0.0021492
CaM	146	0.011457	0.0074174
CaM	147	0.0218087	0.0229076
CaM	148	0.00799526	0.00964757
CaM	149	0.0347785	0
