# Supplementary material for: Redox regulation of KV7 channels through EF3 hand of calmodulin
Source: eLife. 2023 Feb 20;12:e81961. doi: 10.7554/eLife.81961 (PMC9988260; doi:10.7554/eLife.81961)
Supplement: Figure 5—figure supplement 1—source data 1. [file elife-81961-fig5-figsupp1-data1.xlsx]

## Sheet: EFFICIENCY
KCNQ1
	Ratio (sum526-530/sum491-495)
Ca2+ uM	0 uM S2S3	0 uM S2S3	0 uM S2S3	0 uM S2S3	Ca2+ uM	5 uM S2S3	5 uM S2S3	5 uM S2S3	5 uM S2S3	Ca2+ uM	10 uM S2S3	10 uM S2S3	10 uM S2S3	10 uM S2S3
0	1.62955	1.62465	1.61975	1.62055	0	1.65795	1.66845	1.64872	1.63797	0	1.65795	1.66845	1.64872	1.63797
2	1.22535	1.26948	1.30452	1.28752	2	1.62841	1.62362	1.61881	1.61959	2	1.9819	1.97986	2.05452	1.95875
10	1.20047	1.23165	1.23446	1.22054	10	1.63235	1.6756	1.70992	1.69327	10	2.06946	2.01845	2.10642	1.99745
100	1.19254	1.2249	1.20546	1.21942	100	1.60797	1.63853	1.64128	1.62764	100	2.0975	2.03942	2.12484	2.08975
	EFFCIENCY	42.49*(LN(RATIO))+21.297
Ca2+ uM	0 uM S2S3	0 uM S2S3	0 uM S2S3	0 uM S2S3	Ca2+ uM	5 uM S2S3	5 uM S2S3	5 uM S2S3	5 uM S2S3	Ca2+ uM	10 uM S2S3	10 uM S2S3	10 uM S2S3	10 uM S2S3
0	42.0449	41.9171	41.7886	41.8096	0	42.7792	43.0475	42.5419	42.2641	0	42.7792	43.0475	42.5419	42.2641
2	29.9319	31.4356	32.5922	32.0349	2	42.0154	41.8901	41.7641	41.7847	2	50.3625	50.3188	51.8915	49.8632
10	29.0603	30.1502	30.247	29.7651	10	42.1179	43.229	44.0907	43.6748	10	52.1995	51.139	52.9515	50.6946
100	28.7789	29.9164	29.2368	29.7258	100	41.4785	42.2785	42.3498	41.9952	100	52.7712	51.5781	53.3216	52.6139
KCNQ3
	Ratio (sum526-530/sum491-495)
Ca2+ uM	0 uM S2S3	0 uM S2S3	0 uM S2S3	0 uM S2S3	Ca2+ uM	5 uM S2S3	5 uM S2S3	5 uM S2S3	5 uM S2S3	Ca2+ uM	10 uM S2S3	10 uM S2S3	10 uM S2S3	10 uM S2S3
0	1.64985	1.63254	1.64161	1.62055	0	1.64163	1.62416	1.65165	1.62051	0	1.65745	1.66416	1.6495	1.65897
2	1.25345	1.2745	1.26465	1.27846	2	1.63065	1.64566	1.67491	1.63121	2	1.88389	1.85848	1.84847	1.86785
10	1.20546	1.21654	1.22545	1.23042	10	1.63642	1.65895	1.66106	1.6415	10	1.97245	1.87985	1.95875	1.92464
100	1.19957	1.21064	1.20546	1.21917	100	1.65985	1.65146	1.63645	1.66595	100	1.98359	1.90444	1.97496	1.93466
	EFFCIENCY	42.49*(LN(RATIO))+21.297
Ca2+ uM	0 uM S2S3	0 uM S2S3	0 uM S2S3	0 uM S2S3	Ca2+ uM	5 uM S2S3	5 uM S2S3	5 uM S2S3	5 uM S2S3	Ca2+ uM	10 uM S2S3	10 uM S2S3	10 uM S2S3	10 uM S2S3
0	42.571	42.123	42.3584	41.8096	0	42.3588	41.9043	42.6173	41.8087	0	42.7665	42.9381	42.562	42.8054
2	30.8955	31.603	31.2736	31.7351	2	42.0738	42.4629	43.2117	42.0884	2	48.2077	47.6305	47.401	47.8441
10	29.2368	29.6256	29.9357	30.1074	10	42.2237	42.8048	42.8589	42.3554	10	50.1596	48.1162	49.8632	49.117
100	29.0285	29.419	29.2368	29.7171	100	42.8277	42.6126	42.2245	42.9836	100	50.3989	48.6686	50.2135	49.3374
KCNQ4
	Ratio (sum526-530/sum491-495)
Ca2+ uM	0 uM S2S3	0 uM S2S3	0 uM S2S3	0 uM S2S3	Ca2+ uM	5 uM S2S3	5 uM S2S3	5 uM S2S3	5 uM S2S3	Ca2+ uM	10 uM S2S3	10 uM S2S3	10 uM S2S3	10 uM S2S3
0	1.65421	1.64465	1.63501	1.65266	0	1.64166	1.65216	1.64963	1.66156	0	1.65416	1.66115	1.67115	1.65988
2	1.3959	1.41652	1.37466	1.38451	2	1.67982	1.66642	1.65233	1.67257	2	1.84817	1.83255	1.85451	1.88656
10	1.22512	1.24957	1.22561	1.23656	10	1.69707	1.66067	1.68455	1.68055	10	1.91466	1.90545	1.92345	1.91045
100	1.24441	1.24032	1.21056	1.21815	100	1.70121	1.64252	1.675	1.67553	100	1.92056	1.91066	1.94212	1.91461
	EFFCIENCY	42.49*(LN(RATIO))+21.297
Ca2+ uM	0 uM S2S3	0 uM S2S3	0 uM S2S3	0 uM S2S3	Ca2+ uM	5 uM S2S3	5 uM S2S3	5 uM S2S3	5 uM S2S3	Ca2+ uM	10 uM S2S3	10 uM S2S3	10 uM S2S3	10 uM S2S3
0	42.6833	42.4368	42.1871	42.6433	0	42.3595	42.6306	42.5653	42.8716	0	42.682	42.8612	43.1162	42.8285
2	35.469	36.092	34.8177	35.121	2	43.3359	42.9956	42.635	43.1521	2	47.3941	47.0335	47.5397	48.2678
10	29.9242	30.7636	29.9412	30.3191	10	43.77	42.8487	43.4554	43.3543	10	48.8959	48.6912	49.0905	48.8025
100	30.588	30.4479	29.4161	29.6817	100	43.8737	42.3818	43.2138	43.2272	100	49.0267	48.807	49.5011	48.8949
KCNQ5
	Ratio (sum526-530/sum491-495)
Ca2+ uM	0 uM S2S3	0 uM S2S3	0 uM S2S3	0 uM S2S3	Ca2+ uM	5 uM S2S3	5 uM S2S3	5 uM S2S3	5 uM S2S3	Ca2+ uM	10 uM S2S3	10 uM S2S3	10 uM S2S3	10 uM S2S3
0	1.57601	1.56246	1.55478	1.5488	0	1.55452	1.56689	1.54124	1.5699	0	1.55781	1.56495	1.56798	1.57015
2	1.35164	1.38746	1.35545	1.36465	2	1.54654	1.55846	1.55497	1.55716	2	1.69847	1.68196	1.67495	1.69141
10	1.26564	1.30645	1.33145	1.30846	10	1.53665	1.55806	1.56846	1.5488	10	1.79756	1.77986	1.74579	1.78799
100	1.25416	1.29857	1.31551	1.28654	100	1.50394	1.55075	1.54546	1.54805	100	1.81562	1.79116	1.75061	1.80152
	EFFCIENCY	42.49*(LN(RATIO))+21.297
Ca2+ uM	0 uM S2S3	0 uM S2S3	0 uM S2S3	0 uM S2S3	Ca2+ uM	5 uM S2S3	5 uM S2S3	5 uM S2S3	5 uM S2S3	Ca2+ uM	10 uM S2S3	10 uM S2S3	10 uM S2S3	10 uM S2S3
0	40.6256	40.2586	40.0494	39.8854	0	40.0422	40.3791	39.6775	40.4604	0	40.1321	40.3263	40.4086	40.4674
2	34.1001	35.2113	34.2195	34.5071	2	39.8235	40.1497	40.0546	40.1143	2	43.805	43.3901	43.2127	43.6282
10	31.3068	32.6552	33.4607	32.7206	10	39.5509	40.1387	40.4216	39.8855	10	46.2143	45.7939	44.9728	45.9876
100	30.9196	32.398	32.9489	32.0028	100	38.6368	39.9391	39.7938	39.8649	100	46.6391	46.0629	45.09	46.3078

## Sheet: Q1
0	0	0	0	-18	--	-18	--		Ratio (sum526-530/sum491-495)
2	89.6161	11.7228	-102.453	-17.4609	--	-17.4609	--	Ca2+ uM	0 uM S2S3	0 uM S2S3	0 uM S2S3	0 uM S2S3	Ca2+ uM	5 uM S2S3	5 uM S2S3	5 uM S2S3	5 uM S2S3	Ca2+ uM	10 uM S2S3	10 uM S2S3	10 uM S2S3	10 uM S2S3
10	97.8858	14.7619	-104.513	-16.9219	--	-16.9219	--	0	1.62955	1.62465	1.61975	1.62055		1.65795	1.66845	1.64872	1.63797		1.65795	1.66845	1.64872	1.63797
100	100	17.1065	-107.825	-16.3828	--	-16.3828	--	2	1.22535	1.26948	1.30452	1.28752		1.62841	1.62362	1.61881	1.61959		1.9819	1.97986	2.05452	1.95875
				-15.8438	--	-15.8438	--	10	1.20047	1.23165	1.23446	1.22054		1.63235	1.6756	1.70992	1.69327		2.06946	2.01845	2.10642	1.99745
0	0	0	0	-15.3047	--	-15.3047	--	100	1.19254	1.2249	1.20546	1.21942		1.60797	1.63853	1.64128	1.62764		2.0975	2.03942	2.12484	2.08975
2	57.9345	-0.981363	-90.1126	-14.7656	--	-14.7656	--		Normalized
10	92.9197	-11.2467	-96.9657	-14.2266	--	-14.2266	--	0	0	-0.00300384	-0.00601457	-0.0055235		0.0174313	0.0238748	0.0117637	0.00517224		0.0174313	0.0238748	0.0117637	0.00517224
100	99.6458	-6.21787	-101.629	-13.6875	--	-13.6875	--	2	-0.248045	-0.220958	-0.19946	-0.209892		-0.000694843	-0.00363825	-0.0065884	-0.00610721		0.216226	0.214977	0.26079	0.202019
				-13.1484	--	-13.1484	--	10	-0.263313	-0.244173	-0.242449	-0.250992		0.00171763	0.0282595	0.049325	0.0391037		0.269961	0.238658	0.292639	0.225769
0	0	0	0	-12.6094	--	-12.6094	--	100	-0.268176	-0.248319	-0.260247	-0.251684		-0.0132426	0.00551163	0.00720154	-0.00116931		0.287166	0.251524	0.303947	0.28241
2	73.03	5.31645	-95.3103	-12.0703	--	-12.0703	--		Percentage %
10	94.439	1.73988	-99.7219	-11.5312	--	-11.5312	--	0	0	1.1201	2.24277	2.05966		-6.49994	-8.90266	-4.38658	-1.92868		-6.49994	-8.90266	-4.38658	-1.92868
100	98.8145	5.38933	-103.669	-10.9922	--	-10.9922	--	2	92.4935	82.3931	74.3767	78.2664		0.2591	1.35666	2.45675	2.27731		-80.6284	-80.1626	-97.246	-75.3306
				-10.4531	--	-10.4531	--	10	98.1865	91.0497	90.4066	93.5921		-0.640486	-10.5377	-18.3928	-14.5814		-100.666	-88.9932	-109.122	-84.187
				-9.91406	--	-9.91406	--	100	100	92.5957	97.0433	93.8502		4.93803	-2.05523	-2.68538	0.436025		-107.081	-93.7905	-113.338	-105.308
				-9.375	--	-9.375	--
				-8.83594	--	-8.83594	--	STATISTICS
				-8.29688	--	-8.29688	--	0 uM S2S3
				-7.75781	--	-7.75781	--	Ca2+ uM	Size	Missing	Mean	Std Dev	Std. Error	C.I. of Mean
				-7.21875	--	-7.21875	--	0	4	0	1.356	1.029	0.514	1.637
				-6.67969	--	-6.67969	--	2	4	0	81.882	7.795	3.897	12.403
				-6.14062	--	-6.14062	--	10	4	0	93.309	3.531	1.765	5.618
				-5.60156	--	-5.60156	--	100	4	0	95.872	3.328	1.664	5.296
				-5.0625	--	-5.0625	--
				-4.52344	--	-4.52344	--	5 uM S2S3
				-3.98438	--	-3.98438	--	Ca2+ uM	Size	Missing	Mean	Std Dev	Std. Error	C.I. of Mean
				-3.44531	--	-3.44531	--	0	4	0	-5.429	2.975	1.488	4.734
				-2.90625	--	-2.90625	--	2	4	0	1.587	1.008	0.504	1.604
				-2.36719	--	-2.36719	--	10	4	0	-11.038	7.638	3.819	12.153
				-1.82812	--	-1.82812	--	100	4	0	0.158	3.46	1.73	5.505
				-1.28906	--	-1.28906	--
				-0.75	--	-0.75	--	10 uM S2S3
				-0.210938	--	-0.210938	--	Ca2+ uM	Size	Missing	Mean	Std Dev	Std. Error	C.I. of Mean
				0.328125	23.2437	0.328125	-88.7345	0	4	0	-5.429	2.975	1.488	4.734
				0.867188	49.9598	0.867188	-92.9436	2	4	0	-83.342	9.574	4.787	15.234
				1.40625	64.3544	1.40625	-94.7526	10	4	0	-95.742	11.289	5.645	17.964
				1.94531	72.8624	1.94531	-95.8671	100	4	0	-104.879	8.156	4.078	12.978
				2.48438	78.3502	2.48438	-96.6566
				3.02344	82.1325	3.02344	-97.2601
				3.5625	84.8735	3.5625	-97.7442
				4.10156	86.9385	4.10156	-98.1457
				4.64062	88.5428	4.64062	-98.487
				5.17969	89.8206	5.17969	-98.7826
				5.71875	90.8594	5.71875	-99.0425
				6.25781	91.7185	6.25781	-99.2738
				6.79688	92.4396	6.79688	-99.4816
				7.33594	93.0523	7.33594	-99.67
				7.875	93.5787	7.875	-99.842
				8.41406	94.0352	8.41406	-100
				8.95312	94.4345	8.95312	-100.146
				9.49219	94.7864	9.49219	-100.281
				10.0312	95.0986	10.0312	-100.407
				10.5703	95.3773	10.5703	-100.525
				11.1094	95.6273	11.1094	-100.636
				11.6484	95.8529	11.6484	-100.74
				12.1875	96.0572	12.1875	-100.839
				12.7266	96.243	12.7266	-100.932
				13.2656	96.4128	13.2656	-101.02
				13.8047	96.5683	13.8047	-101.104
				14.3438	96.7114	14.3438	-101.184
				14.8828	96.8433	14.8828	-101.261
				15.4219	96.9652	15.4219	-101.334
				15.9609	97.0783	15.9609	-101.403
				16.5	97.1835	16.5	-101.47
				17.0391	97.2814	17.0391	-101.535
				17.5781	97.3729	17.5781	-101.597
				18.1172	97.4585	18.1172	-101.656
				18.6562	97.5387	18.6562	-101.713
				19.1953	97.614	19.1953	-101.769
				19.7344	97.6849	19.7344	-101.822
				20.2734	97.7516	20.2734	-101.874
				20.8125	97.8146	20.8125	-101.923
				21.3516	97.8742	21.3516	-101.972
				21.8906	97.9306	21.8906	-102.019
				22.4297	97.984	22.4297	-102.064
				22.9688	98.0346	22.9688	-102.108
				23.5078	98.0828	23.5078	-102.151
				24.0469	98.1285	24.0469	-102.192
				24.5859	98.1721	24.5859	-102.233
				25.125	98.2137	25.125	-102.272
				25.6641	98.2533	25.6641	-102.31
				26.2031	98.2912	26.2031	-102.347
				26.7422	98.3274	26.7422	-102.384
				27.2812	98.362	27.2812	-102.419
				27.8203	98.3951	27.8203	-102.454
				28.3594	98.4269	28.3594	-102.487
				28.8984	98.4574	28.8984	-102.52
				29.4375	98.4866	29.4375	-102.553
				29.9766	98.5147	29.9766	-102.584
				30.5156	98.5417	30.5156	-102.615
				31.0547	98.5677	31.0547	-102.645
				31.5938	98.5927	31.5938	-102.674
				32.1328	98.6168	32.1328	-102.703
				32.6719	98.64	32.6719	-102.731
				33.2109	98.6624	33.2109	-102.759
				33.75	98.684	33.75	-102.786
				34.2891	98.7048	34.2891	-102.812
				34.8281	98.725	34.8281	-102.838
				35.3672	98.7444	35.3672	-102.864
				35.9062	98.7632	35.9062	-102.889
				36.4453	98.7814	36.4453	-102.913
				36.9844	98.7991	36.9844	-102.938
				37.5234	98.8161	37.5234	-102.961
				38.0625	98.8327	38.0625	-102.984
				38.6016	98.8487	38.6016	-103.007
				39.1406	98.8642	39.1406	-103.03
				39.6797	98.8793	39.6797	-103.052
				40.2188	98.8939	40.2188	-103.073
				40.7578	98.9081	40.7578	-103.095
				41.2969	98.9219	41.2969	-103.116
				41.8359	98.9353	41.8359	-103.136
				42.375	98.9484	42.375	-103.157
				42.9141	98.961	42.9141	-103.177
				43.4531	98.9733	43.4531	-103.196
				43.9922	98.9853	43.9922	-103.216
				44.5312	98.997	44.5312	-103.235
				45.0703	99.0084	45.0703	-103.253
				45.6094	99.0194	45.6094	-103.272
				46.1484	99.0302	46.1484	-103.29
				46.6875	99.0407	46.6875	-103.308
				47.2266	99.0509	47.2266	-103.326
				47.7656	99.0609	47.7656	-103.343
				48.3047	99.0706	48.3047	-103.36
				48.8438	99.0801	48.8438	-103.377
				49.3828	99.0894	49.3828	-103.394
				49.9219	99.0985	49.9219	-103.41
				50.4609	99.1073	50.4609	-103.427
				51	99.1159	51	-103.443
				51.5391	99.1243	51.5391	-103.459
				52.0781	99.1326	52.0781	-103.474
				52.6172	99.1406	52.6172	-103.49
				53.1562	99.1485	53.1562	-103.505
				53.6953	99.1562	53.6953	-103.52
				54.2344	99.1637	54.2344	-103.535
				54.7734	99.1711	54.7734	-103.549
				55.3125	99.1783	55.3125	-103.564
				55.8516	99.1853	55.8516	-103.578
				56.3906	99.1922	56.3906	-103.592
				56.9297	99.199	56.9297	-103.606
				57.4688	99.2056	57.4688	-103.62
				58.0078	99.2121	58.0078	-103.634
				58.5469	99.2184	58.5469	-103.647
				59.0859	99.2246	59.0859	-103.661
				59.625	99.2307	59.625	-103.674
				60.1641	99.2367	60.1641	-103.687
				60.7031	99.2426	60.7031	-103.7
				61.2422	99.2483	61.2422	-103.712
				61.7812	99.2539	61.7812	-103.725
				62.3203	99.2595	62.3203	-103.737
				62.8594	99.2649	62.8594	-103.75
				63.3984	99.2702	63.3984	-103.762
				63.9375	99.2754	63.9375	-103.774
				64.4766	99.2805	64.4766	-103.786
				65.0156	99.2855	65.0156	-103.798
				65.5547	99.2905	65.5547	-103.809
				66.0938	99.2953	66.0938	-103.821
				66.6328	99.3001	66.6328	-103.832
				67.1719	99.3048	67.1719	-103.844
				67.7109	99.3093	67.7109	-103.855
				68.25	99.3139	68.25	-103.866
				68.7891	99.3183	68.7891	-103.877
				69.3281	99.3226	69.3281	-103.888
				69.8672	99.3269	69.8672	-103.899
				70.4062	99.3311	70.4062	-103.909
				70.9453	99.3353	70.9453	-103.92
				71.4844	99.3393	71.4844	-103.93
				72.0234	99.3433	72.0234	-103.941
				72.5625	99.3473	72.5625	-103.951
				73.1016	99.3512	73.1016	-103.961
				73.6406	99.355	73.6406	-103.971
				74.1797	99.3587	74.1797	-103.981
				74.7188	99.3624	74.7188	-103.991
				75.2578	99.366	75.2578	-104.001
				75.7969	99.3696	75.7969	-104.011
				76.3359	99.3731	76.3359	-104.02
				76.875	99.3766	76.875	-104.03
				77.4141	99.38	77.4141	-104.039
				77.9531	99.3833	77.9531	-104.049
				78.4922	99.3866	78.4922	-104.058
				79.0312	99.3899	79.0312	-104.067
				79.5703	99.3931	79.5703	-104.076
				80.1094	99.3963	80.1094	-104.085
				80.6484	99.3994	80.6484	-104.094
				81.1875	99.4024	81.1875	-104.103
				81.7266	99.4055	81.7266	-104.112
				82.2656	99.4084	82.2656	-104.121
				82.8047	99.4114	82.8047	-104.13
				83.3438	99.4143	83.3438	-104.138
				83.8828	99.4171	83.8828	-104.147
				84.4219	99.4199	84.4219	-104.155
				84.9609	99.4227	84.9609	-104.164
				85.5	99.4254	85.5	-104.172
				86.0391	99.4281	86.0391	-104.18
				86.5781	99.4308	86.5781	-104.188
				87.1172	99.4334	87.1172	-104.197
				87.6562	99.436	87.6562	-104.205
				88.1953	99.4385	88.1953	-104.213
				88.7344	99.441	88.7344	-104.221
				89.2734	99.4435	89.2734	-104.229
				89.8125	99.446	89.8125	-104.236
				90.3516	99.4484	90.3516	-104.244
				90.8906	99.4508	90.8906	-104.252
				91.4297	99.4531	91.4297	-104.26
				91.9688	99.4554	91.9688	-104.267
				92.5078	99.4577	92.5078	-104.275
				93.0469	99.46	93.0469	-104.282
				93.5859	99.4622	93.5859	-104.29
				94.125	99.4644	94.125	-104.297
				94.6641	99.4666	94.6641	-104.304
				95.2031	99.4687	95.2031	-104.312
				95.7422	99.4709	95.7422	-104.319
				96.2812	99.473	96.2812	-104.326
				96.8203	99.475	96.8203	-104.333
				97.3594	99.4771	97.3594	-104.34
				97.8984	99.4791	97.8984	-104.347
				98.4375	99.4811	98.4375	-104.354
				98.9766	99.4831	98.9766	-104.361
				99.5156	99.485	99.5156	-104.368
				100.055	99.4869	100.055	-104.375
				100.594	99.4888	100.594	-104.382
				101.133	99.4907	101.133	-104.388
				101.672	99.4926	101.672	-104.395
				102.211	99.4944	102.211	-104.402
				102.75	99.4962	102.75	-104.408
				103.289	99.498	103.289	-104.415
				103.828	99.4998	103.828	-104.422
				104.367	99.5015	104.367	-104.428
				104.906	99.5033	104.906	-104.434
				105.445	99.505	105.445	-104.441
				105.984	99.5067	105.984	-104.447
				106.523	99.5083	106.523	-104.454
				107.062	99.51	107.062	-104.46
				107.602	99.5116	107.602	-104.466
				108.141	99.5133	108.141	-104.472
				108.68	99.5149	108.68	-104.478
				109.219	99.5164	109.219	-104.484
				109.758	99.518	109.758	-104.491
				110.297	99.5196	110.297	-104.497
				110.836	99.5211	110.836	-104.503
				111.375	99.5226	111.375	-104.509
				111.914	99.5241	111.914	-104.515
				112.453	99.5256	112.453	-104.52
				112.992	99.527	112.992	-104.526
				113.531	99.5285	113.531	-104.532
				114.07	99.5299	114.07	-104.538
				114.609	99.5314	114.609	-104.544
				115.148	99.5328	115.148	-104.549
				115.688	99.5342	115.688	-104.555
				116.227	99.5355	116.227	-104.561
				116.766	99.5369	116.766	-104.566
				117.305	99.5382	117.305	-104.572
				117.844	99.5396	117.844	-104.577
				118.383	99.5409	118.383	-104.583
				118.922	99.5422	118.922	-104.589
				119.461	99.5435	119.461	-104.594
				120	99.5448	120	-104.599

## Sheet: Q3
	Ratio (sum526-530/sum491-495)
Ca2+ uM	0 uM S2S3	0 uM S2S3	0 uM S2S3	0 uM S2S3	Ca2+ uM	5 uM S2S3	5 uM S2S3	5 uM S2S3	5 uM S2S3	Ca2+ uM	10 uM S2S3	10 uM S2S3	10 uM S2S3	10 uM S2S3
0	1.64985	1.63254	1.64161	1.62055		1.64163	1.62416	1.65165	1.62051		1.65745	1.66416	1.6495	1.65897
2	1.25345	1.2745	1.26465	1.27846		1.63065	1.64566	1.67491	1.63121		1.88389	1.85848	1.84847	1.86785
10	1.20546	1.21654	1.22545	1.23042		1.63642	1.65895	1.66106	1.6415		1.97245	1.87985	1.95875	1.92464
100	1.19957	1.21064	1.20546	1.21917		1.65985	1.65146	1.63645	1.66595		1.98359	1.90444	1.97496	1.93466
	Normalized
0	0	-0.0104864	-0.00498969	-0.0177588		-0.00498188	-0.0155677	0.00109141	-0.0177799		0.00461177	0.00867882	-0.000212023	0.00553337
2	-0.240261	-0.227506	-0.233471	-0.225101		-0.0116319	-0.00253929	0.0151935	-0.0112923		0.141861	0.126454	0.120388	0.132133
10	-0.269349	-0.262633	-0.257231	-0.254224		-0.00813973	0.00551836	0.00680034	-0.00506102		0.195539	0.139407	0.18723	0.166561
100	-0.272922	-0.266209	-0.269348	-0.261042		0.00606127	0.000979528	-0.00812197	0.00975895		0.202291	0.154317	0.197057	0.172629
	Percentage %
0	0	3.84228	1.82825	6.5069		1.82539	5.70409	-0.399899	6.51464		-1.68977	-3.17996	0.0776862	-2.02745
2	88.0328	83.3593	85.5449	82.478		4.26198	0.930409	-5.56695	4.13754		-51.9786	-46.3334	-44.1106	-48.4143
10	98.6907	96.2299	94.2506	93.1488		2.98243	-2.02195	-2.49168	1.85438		-71.6464	-51.0794	-68.6018	-61.0286
100	100	97.5404	98.6906	95.6469		-2.22088	-0.358904	2.97593	-3.57573		-74.1205	-56.5424	-72.2027	-63.252
STATISTICS
0 uM S2S3
Ca2+ uM	Size	Missing	Mean	Std Dev	Std. Error	C.I. of Mean
0	4	0	3.044	2.791	1.396	4.441
2	4	0	84.854	2.481	1.24	3.947
10	4	0	95.58	2.434	1.217	3.873
100	4	0	97.969	1.846	0.923	2.937
5 uM S2S3
Ca2+ uM	Size	Missing	Mean	Std Dev	Std. Error	C.I. of Mean
0	4	0	3.411	3.262	1.631	5.191
2	4	0	0.941	4.604	2.302	7.327
10	4	0	0.0808	2.745	1.372	4.368
100	4	0	-0.795	2.839	1.419	4.517
10 uM S2S3
Ca2+ uM	Size	Missing	Mean	Std Dev	Std. Error	C.I. of Mean
0	4	0	-1.705	1.349	0.674	2.146
2	4	0	-47.709	3.345	1.673	5.323
10	4	0	-63.089	9.167	4.583	14.587
100	4	0	-66.529	8.171	4.085	13.002

## Sheet: Q5
	Ratio (sum526-530/sum491-495)
Ca2+ uM	0 uM S2S3	0 uM S2S3	0 uM S2S3	0 uM S2S3	Ca2+ uM	5 uM S2S3	5 uM S2S3	5 uM S2S3	5 uM S2S3	Ca2+ uM	10 uM S2S3	10 uM S2S3	10 uM S2S3	10 uM S2S3
0	1.57601	1.56246	1.55478	1.5488		1.55452	1.56689	1.54124	1.5699		1.55781	1.56495	1.56798	1.57015
2	1.35164	1.38746	1.35545	1.36465		1.54654	1.55846	1.55497	1.55716		1.69847	1.68196	1.67495	1.69141
10	1.26564	1.30645	1.33145	1.30846		1.53665	1.55806	1.56846	1.5488		1.79756	1.77986	1.74579	1.78799
100	1.25416	1.29857	1.31551	1.28654		1.50394	1.55075	1.54546	1.54805		1.81562	1.79116	1.75061	1.80152
	Normalized
0	0	-0.00860131	-0.0134693	-0.0172693		-0.0136364	-0.00578534	-0.0220662	-0.00387962		-0.0115476	-0.0070195	-0.00509366	-0.0037171
2	-0.142366	-0.119642	-0.139953	-0.134111		-0.0187008	-0.0111388	-0.0133487	-0.0119604		0.0776982	0.0672259	0.0627801	0.0732233
10	-0.196934	-0.17104	-0.155175	-0.169763		-0.0249762	-0.0113931	-0.00478909	-0.0172668		0.140573	0.129342	0.107729	0.134502
100	-0.204218	-0.176043	-0.165291	-0.183671		-0.045728	-0.0160261	-0.0193865	-0.0177448		0.152031	0.136515	0.110787	0.143085
	Percentage %
0	0	4.21182	6.59556	8.45632		6.67736	2.83292	10.8052	1.89975		5.65453	3.43726	2.49423	1.82016
2	69.7129	58.5853	68.531	65.6703		9.15728	5.45436	6.5365	5.85666		-38.0467	-32.9187	-30.7417	-35.8554
10	96.4333	83.7536	75.985	83.1281		12.2301	5.5789	2.34509	8.4551		-68.8346	-63.3351	-52.752	-65.8622
100	100	86.2037	80.9382	89.9387		22.3918	7.84755	9.49303	8.68913		-74.4456	-66.8476	-54.2492	-70.0649
STATISTICS
0 uM S2S3
Ca2+ uM	Size	Missing	Mean	Std Dev	Std. Error	C.I. of Mean
0	4	0	4.816	3.65	1.825	5.809
2	4	0	65.625	4.99	2.495	7.941
10	4	0	84.825	8.503	4.252	13.531
100	4	0	89.27	8.05	4.025	12.809
5 uM S2S3
Ca2+ uM	Size	Missing	Mean	Std Dev	Std. Error	C.I. of Mean
0	4	0	5.554	4.066	2.033	6.47
2	4	0	6.751	1.665	0.833	2.649
10	4	0	7.152	4.206	2.103	6.692
100	4	0	12.105	6.89	3.445	10.964
10 uM S2S3
Ca2+ uM	Size	Missing	Mean	Std Dev	Std. Error	C.I. of Mean
0	4	0	3.352	1.672	0.836	2.661
2	4	0	-34.391	3.214	1.607	5.115
10	4	0	-62.696	7	3.5	11.138
100	4	0	-66.402	8.68	4.34	13.811

## Sheet: Q4
	Ratio (sum526-530/sum491-495)
Ca2+ uM	0 uM S2S3	0 uM S2S3	0 uM S2S3	0 uM S2S3	Ca2+ uM	5 uM S2S3	5 uM S2S3	5 uM S2S3	5 uM S2S3	Ca2+ uM	10 uM S2S3	10 uM S2S3	10 uM S2S3	10 uM S2S3
0	1.65421	1.64465	1.63501	1.65266	0	1.64166	1.65216	1.64963	1.66156	0	1.65416	1.66115	1.67115	1.65988
2	1.3959	1.41652	1.37466	1.38451	2	1.67982	1.66642	1.65233	1.67257	2	1.84817	1.83255	1.85451	1.88656
10	1.22512	1.24957	1.22561	1.23656	10	1.69707	1.66067	1.68455	1.68055	10	1.91466	1.90545	1.92345	1.91045
100	1.24441	1.24032	1.21056	1.21815	100	1.70121	1.64252	1.675	1.67553	100	1.92056	1.91066	1.94212	1.91461
	Normalized
0	0	-0.00578321	-0.0116103	-0.000940676	0	-0.00759017	-0.00123968	-0.00277236	0.00444093	0	-3.08243e-05	0.00419675	0.0102404	0.00342347
2	-0.156156	-0.143691	-0.168993	-0.163038	2	0.0154777	0.00737684	-0.00113629	0.0110955	2	0.117248	0.107806	0.121085	0.140461
10	-0.259393	-0.244615	-0.259096	-0.252476	10	0.0259056	0.00390116	0.018337	0.0159186	10	0.157442	0.15188	0.162757	0.154903
100	-0.247731	-0.250207	-0.268195	-0.263606	100	0.0284122	-0.00707029	0.0125636	0.0128846	100	0.161013	0.155025	0.174046	0.157416
	Percentage %
0	0	2.33447	4.68663	0.379716	0	3.06387	0.500411	1.1191	-1.79264	0	0.0124426	-1.69407	-4.13368	-1.38193
2	63.0343	58.0028	68.2162	65.8126	2	-6.24776	-2.97776	0.458677	-4.47883	2	-47.3287	-43.5174	-48.8774	-56.6989
10	104.707	98.7422	104.587	101.915	10	-10.4571	-1.57476	-7.40196	-6.42577	10	-63.5536	-61.3085	-65.6989	-62.5286
100	100	100.999	108.261	106.408	100	-11.469	2.85401	-5.07145	-5.20105	100	-64.9952	-62.5778	-70.256	-63.5431
STATISTICS
0 uM S2S3
Ca2+ uM	Size	Missing	Mean	Std Dev	Std. Error	C.I. of Mean
0	4	0	1.85	2.15	1.075	3.421
2	4	0	63.766	4.387	2.194	6.981
10	4	0	102.488	2.81	1.405	4.472
100	4	0	103.917	4.038	2.019	6.426
5 uM S2S3
Ca2+ uM	Size	Missing	Mean	Std Dev	Std. Error	C.I. of Mean
0	4	0	0.723	2.001	1.001	3.184
2	4	0	-3.311	2.847	1.423	4.53
10	4	0	-6.465	3.685	1.842	5.863
100	4	0	-4.722	5.867	2.934	9.336
10 uM S2S3
Ca2+ uM	Size	Missing	Mean	Std Dev	Std. Error	C.I. of Mean
0	4	0	-1.799	1.724	0.862	2.743
2	4	0	-49.106	5.541	2.77	8.816
10	4	0	-63.272	1.86	0.93	2.959
100	4	0	-65.343	3.423	1.711	5.446
