# Supplementary material for: Redox regulation of KV7 channels through EF3 hand of calmodulin
Source: eLife. 2023 Feb 20;12:e81961. doi: 10.7554/eLife.81961 (PMC9988260; doi:10.7554/eLife.81961)
Supplement: Figure 5—source data 1. [file elife-81961-fig5-data1.xlsx]

## Sheet: CaM WT RAW
Ratio (sum526-530/sum491-495)				Normalized				Percentage %
Ca uM	0 uM S2S3	5 uM S2S3	10 uM S2S3	Ca uM	0 uM S2S3	5 uM S2S3	10 uM S2S3	Ca uM	0 uM S2S3	5 uM S2S3	10 uM S2S3
0	1.61216	1.61032	1.61228	0	-0.0116362	-0.00754069	-0.0263657	0	3.98247	2.58078	9.02359			3.98247	0.123516	0	4.09162	0.27753	0.0949799	4.24888
0.5	1.48732		1.72436	0.5	-0.0881705		0.0413158	0.5	30.1761		-14.1402			30.1761	14.1591	32.9335	30.308	14.275	19.6702	30.353
1	1.28502	1.58221	1.91796	1	-0.212199	-0.0248602	0.158227	1	72.6243	8.50834	-54.1528			72.6243		67.5834	65.2465	63.2745	65.9397	69.1656
2	1.18956	1.57448	2.10738	2	-0.270719	-0.0296295	0.272618	2	92.6527	10.1406	-93.3025			92.6527	70.3005	72.9882	95.1337	77.0024	73.073
4	1.17808	1.57508	2.18947	4	-0.27776	-0.0292543	0.322188	4	95.0625	10.0122	-110.268			95.0625	76.8791	75.7899	97.8901	84.7024	75.8227	95.1833
8	1.16476	1.56782	2.14865	8	-0.285924	-0.0337285	0.297539	8	97.8567	11.5435	-101.832			97.8567	84.7089	77.8197	99.6018	86.1008	79.0221	97.9265
16	1.15669	1.56074	2.19604	16	-0.290873	-0.0380944	0.326159	16	99.5504	13.0377	-111.627			99.5504	86.0475	77.9735	100	86.3677	79.9257	99.653
											0
0	1.63055	1.62542	1.61505	0	-0.000360897	0.00176747	-0.0246932	0	0.123516	-0.604913	8.45118			0	0.5	1	2	4	8	16
0.5	1.56366		1.80264	0.5	-0.0413711		0.0885903	0.5	14.1591		-30.3198			0	27.4084	90.1183	92.7825	95.304	98.2277	100		Column	Size	Missing	Mean	Std Dev	Std. Error	C.I. of Mean
1		1.6313	1.90236	1		0.00539424	0.14881	1		-1.84616	-50.9299			-4.03792	10.6486	105.516	69.3936	76.2773	84.4703	85.8709		Col 1	7	0	-2.251	2.231	0.843	2.064
2	1.29609	1.63105	1.92709	2	-0.205409	0.00524116	0.163745	2	70.3005	-1.79377	-56.0413			-4.16716	52.2488	53.3775	72.206	75.1376	77.2615	77.4224		Col 2	7	0	29.788	17.101	6.464	15.816
4	1.26474	1.57665	1.94369	4	-0.22463	-0.0282915	0.173768	4	76.8791	9.68269	-59.4715			0.114216	27.5465	90.0968	95.3785	98.2627	100.054	100.47		Col 3	7	0	78.882	20.311	7.677	18.784
8	1.22742	1.57401	1.95522	8	-0.247508	-0.0299139	0.18073	8	84.7089	10.2379	-61.8544			-3.87676	10.7699	69.4619	76.4064	84.4634	85.9266	86.206		Col 4	7	0	81.985	11.944	4.514	11.046
16	1.22104	1.57154	1.96545	16	-0.251419	-0.0314398	0.186911	16	86.0475	10.7602	-63.9697			-4.06777	52.299	53.4396	72.2947	75.1719	78.5197	79.4652		Col 5	7	0	86.131	10.956	4.141	10.133
														0.278771	27.5935	90.1612	95.4304	98.3008	100.107			Col 6	7	0	89.224	10.066	3.805	9.31
0	1.63114	1.62255	1.65594	0	0	-0.00526766	0.0152028	0	0	1.80284	-5.2031			Ca2+ uM	Size	Missing	Mean	Std Dev	Std. Error	C.I. of Mean		Col 7	6	0	88.239	9.916	4.048	10.406
0.5	1.47418	1.6289	1.8246	0.5	-0.0962273	-0.00137458	0.1186	0.5	32.9335	0.470445	-40.5904			0	7	0	1.831	2.132	0.806	1.972
1	1.30904	1.62894	1.82302	1	-0.19747	-0.0013477	0.117635	1	67.5834	0.461248	-40.2603			0.5	7	0	24.554	8.227	3.11	7.609
2	1.28328	1.57409	1.80358	2	-0.213262	-0.0349767	0.105715	2	72.9882	11.9707	-36.1807			1	7	1	67.306	3.292	1.344	3.455
4	1.26993	1.57161	1.881	4	-0.221448	-0.0364952	0.153177	4	75.7899	12.4904	-52.4244			2	6	0	80.192	10.855	4.431	11.391
8	1.26026	1.569	1.89246	8	-0.227379	-0.0380993	0.160204	8	77.8197	13.0394	-54.8295			4	7	0	85.904	10.004	3.781	9.252
16	1.25952	1.55897	1.90022	16	-0.227828	-0.0442464	0.164959	16	77.9735	15.1432	-56.4569			8	7	0	89.005	9.326	3.525	8.626
														16	7	0	89.931	9.655	3.649	8.929
0	1.61164	1.62027	1.60656	0	-0.0119552	-0.00666615	-0.0150728	0	4.09162	2.28147	5.15861
0.5	1.4867	1.65051	1.85239	0.5	-0.0885561	0.0118706	0.135639	0.5	30.308	-4.06269	-46.4221
1	1.32018	1.62585	1.89015	1	-0.190642	-0.00324335	0.158786	1	65.2465	1.11003	-54.3441
2	1.17774	1.6263	1.94455	2	-0.277968	-0.0029707	0.192141	2	95.1337	1.01671	-65.7596
4	1.1646	1.57217	1.98948	4	-0.286022	-0.0361519	0.219686	4	97.8901	12.3729	-75.187
8	1.15644	1.56931	1.96349	8	-0.291023	-0.0379103	0.203752	8	99.6018	12.9747	-69.7335
16	1.15454	1.56721	1.97851	16	-0.292187	-0.0391967	0.212956	16	100	13.415	-72.8837
0	1.62982	1.60656	1.59786	0	-0.000810904	-0.0150728	-0.0204049	0	0.27753	5.15861	6.98351
0.5	1.56311	1.57119	1.69192	0.5	-0.0417098	-0.0367541	0.0372572	0.5	14.275	12.579	-12.7512
1	1.32958	1.60818	1.88537	1	-0.18488	-0.014076	0.155861	1	63.2745	4.81747	-53.3429
2	1.26415	1.59786	1.96264	2	-0.224991	-0.0204049	0.203232	2	77.0024	6.98351	-69.5557
4	1.22745	1.58301	1.98601	4	-0.247489	-0.0295116	0.217555	4	84.7024	10.1003	-74.4576
8	1.22079	1.59411	1.98654	8	-0.251575	-0.0227051	0.217885	8	86.1008	7.77074	-74.5704
16	1.21952	1.57078	1.98645	16	-0.252355	-0.0370045	0.217829	16	86.3677	12.6647	-74.5515
0	1.63069	1.60431	1.60656	0	-0.000277518	-0.0164525	-0.0150728	0	0.0949799	5.63081	5.15861
0.5	1.5374	1.56548	1.75197	0.5	-0.0574737	-0.0402544	0.0740735	0.5	19.6702	13.777	-25.3514
1	1.31688	1.60533	1.94617	1	-0.192667	-0.0158228	0.193135	1	65.9397	5.41531	-66.0998
2	1.28288	1.59502	1.9469	2	-0.21351	-0.0221468	0.193583	2	73.073	7.57967	-66.2532
4	1.26977	1.5799	1.93127	4	-0.221544	-0.0314174	0.183999	4	75.8227	10.7525	-62.9732
8	1.25453	1.57788	1.9681	8	-0.230892	-0.0326512	0.206578	8	79.0221	11.1748	-70.7008
16	1.25022	1.56383	1.96905	16	-0.233532	-0.041269	0.207157	16	79.9257	14.1242	-70.8988
0	1.61089	1.60066		0	-0.0124147	-0.018689		0	4.24888	6.39625
1	1.48648	1.56359		1	-0.0886873	-0.0414169		1	30.353	14.1748
2	1.3015	1.60122		2	-0.202093	-0.0183457		2	69.1656	6.27877
4	1.1775	1.59256		4	-0.278113	-0.0236521		4	95.1833	8.09485
8	1.16443	1.59621		8	-0.286128	-0.0214167		8	97.9265	7.32982
16	1.1562	1.58549		16	-0.291173	-0.0279891		16	99.653	9.5792
0		1.59859		0		-0.0147656		0		5.05349
0.5		1.56907		0.5		-0.0329589		0.5		11.2801
1		1.59859		1		-0.0147675		1		5.05412
2		1.58971		2		-0.0202385		2		6.92656
4		1.57574		4		-0.0288508		4		9.87409
8		1.57529		8		-0.0291292		8		9.96939
16		1.57529		16		-0.029125		16		9.96794

## Sheet: CAM WT STATISTIC
0 uM S2S3	A	B	C	D	E	F	G	H		5 uM S2S3	A	B	C	D	E	F	G	H			A	B	C	D	E	F
0 uM	1.61216	1.63055	1.63114	1.61164	1.62982	1.63069	1.61089			0 uM	1.61032	1.62542	1.62255	1.62027	1.60656	1.60431	1.60066	1.59859		0 uM	1.61228	1.61505	1.65594	1.60656	1.59786	1.60656
0.5 uM	1.48732	1.56366	1.47418	1.4867	1.56311	1.5374	1.48648			0.5 uM			1.6289	1.65051	1.57119	1.56548		1.56907		0.5 uM	1.72436	1.80264	1.8246	1.85239	1.69192	1.75197
1 uM	1.28502		1.30904	1.32018	1.32958	1.31688	1.3015			1 uM	1.58221	1.6313	1.62894	1.62585	1.60818	1.60533	1.56359	1.59859		1 uM	1.91796	1.90236	1.82302	1.89015	1.88537	1.94617
2 uM	1.18956	1.29609	1.28328	1.17774	1.26415	1.28288	1.1775			2 uM	1.57448	1.63105	1.57409	1.6263	1.59786	1.59502	1.60122	1.58971		2 uM	2.10738	1.92709	1.80358	1.94455	1.96264	1.9469
4 uM	1.17808	1.26474	1.26993	1.1646	1.22745	1.26977	1.16443			4 uM	1.57508	1.57665	1.57161	1.57217	1.58301	1.5799	1.59256	1.57574		4 uM	2.18947	1.94369	1.881	1.98948	1.98601	1.93127
8 uM	1.16476	1.22742	1.26026	1.15644	1.22079	1.25453	1.1562			8 uM	1.56782	1.57401	1.569	1.56931	1.59411	1.57788	1.59621	1.57529		8 uM	2.14865	1.95522	1.89246	1.96349	1.98654	1.9681
16 uM	1.15669	1.22104	1.25952	1.15454	1.21952	1.25022				16 uM	1.56074	1.57154	1.55897	1.56721	1.57078	1.56383	1.58549	1.57529		16 uM	2.19604	1.96545	1.90022	1.97851	1.98645	1.96905
	A	B	C	D	E	F	G	H
0 uM	-0.0116362	-0.000360897	0	-0.0119552	-0.000810904	-0.000277518	-0.0124147				A	B	C	D	E	F	G	H		0 uM	-0.0263657	-0.0246932	0.0152028	-0.0150728	-0.0204049	-0.0150728
0.5 uM	-0.0881705	-0.0413711	-0.0962273	-0.0885561	-0.0417098	-0.0574737	-0.0886873			0 uM	-0.00754069	0.00176747	0	-0.0014059	-0.00985703	-0.011244	-0.0134924	-0.0147656		0.5 uM	0.0413158	0.0885903	0.1186	0.135639	0.0372572	0.0740735
1 uM	-0.212199		-0.19747	-0.190642	-0.18488	-0.192667	-0.202093			0.5 uM			0.0039137	0.017229	-0.0316532	-0.0351721		-0.0329589		1 uM	0.158227	0.14881	0.117635	0.158786	0.155861	0.193135
2 uM	-0.270719	-0.205409	-0.213262	-0.277968	-0.224991	-0.21351	-0.278113			1 uM	-0.0248602	0.00539424	0.00394071	0.00203503	-0.00885499	-0.0106111	-0.0363407	-0.0147675		2 uM	0.272618	0.163745	0.105715	0.192141	0.203232	0.193583
4 uM	-0.27776	-0.22463	-0.221448	-0.286022	-0.247489	-0.221544	-0.286128			2 uM	-0.0296295	0.00524116	-0.0298664	0.00230913	-0.0152174	-0.0169685	-0.0131473	-0.0202385		4 uM	0.322188	0.173768	0.153177	0.219686	0.217555	0.183999
8 uM	-0.285924	-0.247508	-0.227379	-0.291023	-0.251575	-0.230892	-0.291173			4 uM	-0.0292543	-0.0282915	-0.0313929	-0.0310478	-0.0243724	-0.0262882	-0.0184818	-0.0288508		8 uM	0.297539	0.18073	0.160204	0.203752	0.217885	0.206578
16 uM	-0.290873	-0.251419	-0.227828	-0.292187	-0.252355	-0.233532				8 uM	-0.0337285	-0.0299139	-0.0330055	-0.0328155	-0.0175297	-0.0275286	-0.0162346	-0.0291292		16 uM	0.326159	0.186911	0.164959	0.212956	0.217829	0.207157
										16 uM	-0.0380944	-0.0314398	-0.0391851	-0.0341087	-0.0319049	-0.036192	-0.0228418	-0.029125
	A	B	C	D	E	F	G
0 uM	3.98247	0.123516	0	4.09162	0.27753	0.0949799	4.24888
0.5 uM	30.1761	14.1591	32.9335	30.308	14.275	19.6702	30.353				A	B	C	D	E	F	G	H
1 uM	72.6243		67.5834	65.2465	63.2745	65.9397	69.1656			0 uM	2.58078	-0.604913	0	0.481164	3.37354	3.84824	4.61774	5.05349		0 uM	9.02359	8.45118	-5.2031	5.15861	6.98351	5.15861
2 uM	92.6527	70.3005	72.9882	95.1337	77.0024	73.073	95.1833			0.5 uM			-1.33945	-5.89659	10.8332	12.0375		11.2801		0.5 uM	-14.1402	-30.3198	-40.5904	-46.4221	-12.7512	-25.3514
4 uM	95.0625	76.8791	75.7899	97.8901	84.7024	75.8227	97.9265			1 uM	8.50834	-1.84616	-1.3487	-0.696484	3.03059	3.6316	12.4375	5.05412		1 uM	-54.1528	-50.9299	-40.2603	-54.3441	-53.3429	-66.0998
8 uM	97.8567	84.7089	77.8197	99.6018	86.1008	79.0221	99.653			2 uM	10.1406	-1.79377	10.2217	-0.790292	5.2081	5.80742	4.49964	6.92656		2 uM	-93.3025	-56.0413	-36.1807	-65.7596	-69.5557	-66.2532
16 uM	99.5504	86.0475	77.9735	100	86.3677	79.9257				4 uM	10.0122	9.68269	10.7441	10.626	8.34137	8.99707	6.32533	9.87409		4 uM	-110.268	-59.4715	-52.4244	-75.187	-74.4576	-62.9732
										8 uM	11.5435	10.2379	11.296	11.231	5.9995	9.42157	5.55624	9.96939		8 uM	-101.832	-61.8544	-54.8295	-69.7335	-74.5704	-70.7008
										16 uM	13.0377	10.7602	13.411	11.6736	10.9193	12.3866	7.81754	9.96794		16 uM	-111.627	-63.9697	-56.4569	-72.8837	-74.5515	-70.8988
																				0 uM	0.5 uM	1 uM	2 uM	4 uM	8 uM	16 uM
										0 uM	0.5 uM	1 uM	2 uM	4 uM	8 uM	16 uM				9.02359	-14.1402	-54.1528	-93.3025	-110.268	-101.832	-111.627
										2.58078		8.50834	10.1406	10.0122	11.5435	13.0377				8.45118	-30.3198	-50.9299	-56.0413	-59.4715	-61.8544	-63.9697
										-0.604913		-1.84616	-1.79377	9.68269	10.2379	10.7602				-5.2031	-40.5904	-40.2603	-36.1807	-52.4244	-54.8295	-56.4569
										0	-1.33945	-1.3487	10.2217	10.7441	11.296	13.411				5.15861	-46.4221	-54.3441	-65.7596	-75.187	-69.7335	-72.8837
										0.481164	-5.89659	-0.696484	-0.790292	10.626	11.231	11.6736				6.98351	-12.7512	-53.3429	-69.5557	-74.4576	-74.5704	-74.5515
										3.37354	10.8332	3.03059	5.2081	8.34137	5.9995	10.9193				5.15861	-25.3514	-66.0998	-66.2532	-62.9732	-70.7008	-70.8988
										3.84824	12.0375	3.6316	5.80742	8.99707	9.42157	12.3866
										4.61774		12.4375	4.49964	6.32533	5.55624	7.81754
										5.05349	11.2801	5.05412	6.92656	9.87409	9.96939	9.96794
0 uM S2S3										5 uM S2S3										10 uM S2S3
Ca2+ uM	Size	Missing	Mean	Std Dev	Std. Error	C.I. of Mean				Ca2+ free	Size	Missing	Mean	Std Dev	Std. Error	C.I. of Mean				Column	Size	Missing	Mean	Std Dev	Std. Error	C.I. of Mean
0	7	0	1.831	2.132	0.806	1.972				0 uM	7	0	2.396	2.362	0.893	2.185				0 uM	6	0	4.929	5.218	2.13	5.476
0.5	7	0	24.554	8.227	3.11	7.609				0.5 uM	7	2	5.383	8.384	3.75	10.41				0.5 uM	6	0	-28.263	13.671	5.581	14.347
1	7	1	67.306	3.292	1.344	3.455				1 uM	7	0	2.895	4.994	1.888	4.619				1 uM	6	0	-53.188	8.261	3.373	8.67
2	6	0	80.192	10.855	4.431	11.391				2 uM	7	0	4.297	4.246	1.605	3.926				2 uM	6	0	-64.516	18.619	7.601	19.539
4	7	0	85.904	10.004	3.781	9.252				4 uM	7	0	9.78	2.309	0.873	2.135				4 uM	6	0	-72.464	20.499	8.369	21.512
8	7	0	89.005	9.326	3.525	8.626				8 uM	7	0	11.175	1.444	0.546	1.335				8 uM	6	0	-72.253	16.129	6.585	16.927
16	7	0	89.931	9.655	3.649	8.929				16 uM	7	0	12.698	1.462	0.553	1.352				16 uM	6	0	-75.065	19.123	7.807	20.069

## Sheet: CAM 3 RAW
	Ratio (sum526-530/sum491-495)				Normalized				Percentage %
Ca uM	0 uM S2S3	5 uM S2S3	10 uM S2S3	Ca uM	0 uM S2S3	5 uM S2S3	10 uM S2S3	Ca uM	0 uM S2S3	5 uM S2S3	10 uM S2S3	TO NORMALIZED TO CaM WT
0	1.58	1.64379	1.60596	0	-0.0313542	0.00775036	-0.0154388	0	10.7309	-2.65254	5.28387		1.63114
1	1.4972	1.59269	1.76277	1	-0.0821184	-0.0235727	0.0806983	1	28.1048	8.06767	-27.6188		-0.292187
2	1.471	1.58652	1.83889	2	-0.0981762	-0.0273543	0.127365	2	33.6005	9.36192	-43.5903
4	1.43929	1.57549	1.84991	4	-0.117621	-0.0341207	0.134117	4	40.2556	11.6777	-45.9011
8	1.438	1.5748	1.85906	8	-0.118407	-0.0345428	0.139729	8	40.5244	11.8222	-47.822
16	1.42847	1.57048	1.85854	16	-0.124251	-0.0371906	0.13941	16	42.5245	12.7284	-47.7127
0	1.6577	1.66445	1.67128	0	0.0162839	0.0204191	0.0246057	0	-5.57313	-6.98838	-8.42123
1	1.5257	1.69118	1.78023	1	-0.064641	0.0368044	0.0914018	1	22.1232	-12.5962	-31.282
2	1.49467	1.69651	1.82654	2	-0.0836667	0.0400747	0.11979	2	28.6347	-13.7155	-40.9978
4	1.47106	1.64788	1.82909	4	-0.0981426	0.0102602	0.121354	4	33.589	-3.51154	-41.5332
8	1.4605	1.64255	1.83056	8	-0.104617	0.00699019	0.122257	8	35.8047	-2.39237	-41.8421
16	1.46496	1.64225	1.8306	16	-0.101884	0.00681178	0.122282	16	34.8693	-2.33131	-41.8506
0	1.65991	1.64301	1.66922	0	0.0176376	0.00727483	0.0233442	0	-6.03643	-2.48979	-7.98947
1	1.63225	1.65945	1.78066	1	0.000681599	0.017351	0.0916638	1	-0.233275	-5.93833	-31.3717
2	1.54964	1.65232	1.84295	2	-0.0499691	0.0129843	0.12985	2	17.1018	-4.44384	-44.4408
4	1.54767	1.64854	1.8486	4	-0.0511729	0.0106651	0.133316	4	17.5138	-3.6501	-45.627
8	1.5247	1.64965	1.84933	8	-0.0652554	0.0113466	0.133761	8	22.3335	-3.88333	-45.7793
16	1.5217	1.63143	1.84937	16	-0.0670969	0.0001735	0.133785	16	22.9637	-0.0593799	-45.7877
0	1.67872	1.64301	1.61719	0	0.0291652	0.00727483	-0.00855536	0	-9.98171	-2.48979	2.92805
1	1.61266	1.61594	1.75926	1	-0.0113335	-0.00931781	0.0785428	1	3.87886	3.18899	-26.881
2	1.54784	1.60582	1.82079	2	-0.0510693	-0.0155228	0.116265	2	17.4783	5.31265	-39.7913
4	1.50459	1.59854	1.83323	4	-0.0775855	-0.0199883	0.123892	4	26.5534	6.84092	-42.4017
8	1.50453	1.59812	1.83909	8	-0.0776248	-0.0202447	0.127488	8	26.5669	6.92869	-43.6323
16	1.49522	1.59872	1.83913	16	-0.0833281	-0.01988	0.127512	16	28.5188	6.80386	-43.6406
0	1.65389	1.65736	1.6518	0	0.0139434	0.0160704	0.0126652	0	-4.77209	-5.50005	-4.33461
1	1.56064	1.63444	1.73812	1	-0.0432202	0.00202214	0.0655813	1	14.792	-0.692073	-22.445
2	1.49579	1.61391	1.7989	2	-0.0829817	-0.0105672	0.102845	2	28.4002	3.61659	-35.1983
4	1.48249	1.59231	1.80409	4	-0.0911334	-0.0238092	0.106029	4	31.1901	8.14863	-36.2881
8	1.48158	1.58833	1.80864	8	-0.0916894	-0.0262492	0.108819	8	31.3804	8.98372	-37.2429
16	1.48086	1.58522	1.80903	16	-0.0921361	-0.0281529	0.109058	16	31.5333	9.63524	-37.3248
0	1.67236	1.6681	1.63197	0	0.0252678	0.0226575	0.000504375	0	-8.64783	-7.75446	-0.172621
1	1.58282	1.64488	1.71723	1	-0.0296283	0.00842084	0.0527773	1	10.1402	-2.88201	-18.0629
2	1.54698	1.63627	1.77727	2	-0.051595	0.00314037	0.0895879	2	17.6582	-1.07478	-30.6612
4	1.54329	1.61853	1.78188	4	-0.053858	-0.00773263	0.0924106	4	18.4327	2.64647	-31.6273
8	1.5248	1.61543	1.80637	8	-0.0651975	-0.00963091	0.107428	8	22.3136	3.29615	-36.7669
16	1.5239	1.61152	1.80676	16	-0.0657464	-0.0120329	0.107664	16	22.5015	4.11822	-36.8477

## Sheet: CAM 3 STATISTICS
0 uM S2S3								5 uM S2S3									10 uM S2S3
Ca2+ uM	A	B	C	D	E	F		Ca2+ uM	A	B	C	D	E	F		Ca2+ uM	A	B	C	D	E	F
0	10.7309	-5.57313	-6.03643	-9.98171	-4.77209	-8.64783		0	-2.65254	-6.98838	-2.48979	-2.48979	-5.50005	-7.75446		0	5.28387	-8.42123	-7.98947	2.92805	-4.33461	-0.172621
1	28.1048	22.1232	-0.233275	3.87886	14.792	10.1402		1	8.06767	-12.5962	-5.93833	3.18899	-0.692073	-2.88201		1	-27.6188	-31.282	-31.3717	-26.881	-22.445	-18.0629
2	33.6005	28.6347	17.1018	17.4783	28.4002	17.6582		2	9.36192	-13.7155	-4.44384	5.31265	3.61659	-1.07478		2	-43.5903	-40.9978	-44.4408	-39.7913	-35.1983	-30.6612
4	40.2556	33.589	17.5138	26.5534	31.1901	18.4327		4	11.6777	-3.51154	-3.6501	6.84092	8.14863	2.64647		4	-45.9011	-41.5332	-45.627	-42.4017	-36.2881	-31.6273
8	40.5244	35.8047	22.3335	26.5669	31.3804	22.3136		8	11.8222	-2.39237	-3.88333	6.92869	8.98372	3.29615		8	-47.822	-41.8421	-45.7793	-43.6323	-37.2429	-36.7669
16	42.5245	34.8693	22.9637	28.5188	31.5333	22.5015		16	12.7284	-2.33131	-0.0593799	6.80386	9.63524	4.11822		16	-47.7127	-41.8506	-45.7877	-43.6406	-37.3248	-36.8477
Ca2+ uM	Size	Missing	Mean	Std Dev	Std. Error	C.I. of Mean		Ca2+ uM	Size	Missing	Mean	Std Dev	Std. Error	C.I. of Mean			Column	Size	Missing	Mean	Std Dev	Std. Error	C.I. of Mean
0	6	0	-4.047	7.504	3.064	7.875		0	6	0	-4.646	2.415	0.986	2.534			0	6	0	-2.118	5.712	2.332	5.995
1	6	0	13.134	10.779	4.401	11.312		1	6	0	-1.809	7.188	2.935	7.543			1	6	0	-26.277	5.202	2.124	5.46
2	6	0	23.812	7.254	2.962	7.613		2	6	0	-0.157	8.22	3.356	8.626			2	6	0	-39.113	5.276	2.154	5.537
4	6	0	27.922	8.89	3.629	9.33		4	6	0	3.692	6.331	2.585	6.645			4	6	0	-40.563	5.596	2.285	5.873
8	6	0	29.821	7.427	3.032	7.794		8	6	0	4.126	6.293	2.569	6.604			8	6	0	-42.181	4.487	1.832	4.709
16	6	0	30.485	7.608	3.106	7.985		16	6	0	5.149	5.735	2.341	6.019			16	6	0	-42.194	4.424	1.806	4.643

## Sheet: EFFICIENCY
CaM WT										CaM3											CaM124										CaM1234
FRET-RATIO (sum526-530nm/sum491-495nm)					EFFCIENCY	42.49*(LN(RATIO))+21.297					Ratio (sum526-530/sum491-495)				EFFCIENCY	42.49*(LN(RATIO))+21.297						Ratio (sum526-530/sum491-495)				EFFCIENCY	42.49*(LN(RATIO))+21.297					Ratio (sum526-530/sum491-495)				EFFCIENCY	42.49*(LN(RATIO))+21.297
Free Ca2+ uM	0 uM S2S3	5 uM S2S3	10 uM S2S3		Free Ca2+ uM	0 uM S2S3	5 uM S2S3	10 uM S2S3		Free Ca2+ uM	0 uM S2S3	5 uM S2S3	10 uM S2S3		Free Ca2+ uM	0 uM S2S3	5 uM S2S3	10 uM S2S3			Free Ca2+ uM	0 uM pep	5 uM pep	10 uM pep		Free Ca2+ uM	0 uM S2S3	5 uM S2S3	10 uM S2S3		Free Ca2+ uM	0 uM pep	5 uM pep	10 uM pep		Free Ca2+ uM	0 uM S2S3	5 uM S2S3	10 uM S2S3
0	1.61216	1.61032	1.61228		0	42.2622	42.2135	42.2653		0	1.58	1.64379	1.60596		0	41.406	43.0876	42.0984			0	1.6497	1.62439	1.66103		0	43.2403	42.5832	43.5311		0	1.62741	1.62741	1.61204		0	42.6622	42.6622	42.259
0.5	1.48732		1.72436		0.5	38.8376		45.1209		1	1.4972	1.59269	1.76277		1	39.1187	41.746	46.0571			1	1.58545	1.5296	1.84493		1	41.5523	40.0286	47.9926		1	1.64649	1.64649	1.62139		1	43.1574	43.1574	42.5047
1	1.28502	1.58221	1.91796		1	32.6253	41.4655	49.642		2	1.471	1.58652	1.83889		2	38.3688	41.5811	47.8534			2	1.47196	1.65431	1.89516		2	38.3965	43.3588	49.134		2	1.63803	1.63803	1.61422		2	42.9386	42.9386	42.3165
2	1.18956	1.57448	2.10738		2	29.3456	41.2572	53.644		4	1.43929	1.57549	1.84991		4	37.4426	41.2845	48.1071			4	1.41004	1.6304	1.91379		4	36.5703	42.7403	49.5498		4	1.61582	1.61582	1.62251		4	42.3586	42.3586	42.534
4	1.17808	1.57508	2.18947		4	28.9334	41.2736	55.2676		8	1.438	1.5748	1.85906		8	37.4048	41.2659	48.3169			8	1.39286	1.60801	1.92005		8	36.0494	42.1527	49.6884		8	1.57115	1.60712	1.60935		8	41.1674	42.129	42.188
8	1.16476	1.56782	2.14865		8	28.4504	41.0773	54.468		16	1.42847	1.57048	1.85854		16	37.1222	41.1492	48.305			16	1.38005	1.58409	1.91942		16	35.6567	41.5159	49.6745		16	1.64459	1.64459	1.6036		16	43.1084	43.1084	42.0359
16	1.15669	1.56074	2.19604		16	28.1549	40.8849	55.395
										0	1.6577	1.66445	1.67128		0	43.4459	43.6184	43.7924			0	1.60596	1.6445	1.62435		0	42.0984	43.106	42.5823		0	1.62276	1.62276	1.61663		0	42.5405	42.5405	42.3797
0	1.63055	1.62542	1.61505		0	42.7442	42.6102	42.3383		1	1.5257	1.69118	1.78023		1	39.9202	44.2953	46.4759			1	1.49744	1.63118	1.78028		1	39.1257	42.7604	46.477		1	1.63027	1.63422	1.63543		1	42.7369	42.8395	42.8711
0.5	1.56366		1.80264		0.5	40.9643		47.0074		2	1.49467	1.69651	1.82654		2	39.047	44.4291	47.5669			2	1.3472	1.62055	1.79606		2	34.6332	42.4826	46.852		2	1.61913	1.63085	1.62709		2	42.4455	42.7519	42.6539
1		1.6313	1.90236		1		42.7637	49.2952		4	1.47106	1.64788	1.82909		4	38.3704	43.1933	47.6262			4	1.31464	1.61788	1.8077		4	33.5938	42.4126	47.1263		4	1.63698	1.6298	1.60521		4	42.9113	42.7244	42.0785
2	1.29609	1.63105	1.92709		2	32.9899	42.7573	49.844		8	1.4605	1.64255	1.83056		8	38.0643	43.0555	47.6604			8	1.27516	1.6101	1.82016		8	32.2982	42.2077	47.4183		8	1.61922	1.62084	1.5787		8	42.4477	42.4904	41.3709
4	1.26474	1.57665	1.94369		4	31.9494	41.3157	50.2084		16	1.46496	1.64225	1.8306		16	38.1938	43.048	47.6614			16	1.27232	1.60965	1.83649		16	32.2033	42.196	47.7977		16	1.60946	1.61895	1.63356		16	42.191	42.4408	42.8224
8	1.22742	1.57401	1.95522		8	30.6769	41.2447	50.4597
16	1.22104	1.57154	1.96545		16	30.4555	41.1778	50.6815		0	1.65991	1.64301	1.66922		0	43.5024	43.0675	43.74			0	1.57614	1.65684	1.67435		0	41.3021	43.4238	43.8704		0	1.64605	1.60165	1.60587		0	43.1461	41.9841	42.0959
										1	1.63225	1.65945	1.78066		1	42.7885	43.4905	46.4861			1	1.52769	1.66328	1.82746		1	39.9755	43.5884	47.5884		1	1.60233	1.59325	1.61061		1	42.0023	41.7607	42.2214
0	1.63114	1.62255	1.65594		0	42.7596	42.5351	43.4007		2	1.54964	1.65232	1.84295		2	40.5815	43.3077	47.9469			2	1.38317	1.66047	1.89122		2	35.753	43.5166	49.0455		2	1.61742	1.61025	1.60697		2	42.4006	42.2117	42.1253
0.5	1.47418	1.6289	1.8246		0.5	38.4605	42.7011	47.5217		4	1.54767	1.64854	1.8486		4	40.5276	43.2103	48.0771			4	1.31896	1.66942	1.90115		4	33.7331	43.7451	49.2682		4	1.64006	1.60986	1.59651		4	42.9912	42.2014	41.8478
1	1.30904	1.62894	1.82302		1	33.4124	42.7023	47.4851		8	1.5247	1.64965	1.84933		8	39.8922	43.239	48.0938			8	1.25311	1.64141	1.91655		8	31.557	43.026	49.611		8	1.63528	1.6202	1.61114		8	42.8673	42.4736	42.2352
2	1.28328	1.57409	1.80358		2	32.5679	41.2468	47.0295		16	1.5217	1.63143	1.84937		16	39.8085	42.7669	48.0947			16	1.26648	1.64666	1.92467		16	32.008	43.1619	49.7905		16	1.61602	1.63022	1.62119		16	42.3637	42.7354	42.4994
4	1.26993	1.57161	1.881		4	32.1235	41.1799	48.8153
8	1.26026	1.569	1.89246		8	31.7986	41.1091	49.0734		0	1.67872	1.64301	1.61719		0	43.9811	43.0675	42.3945			0	1.6055	1.62404	1.60915		0	42.0864	42.5741	42.1829		0	1.64929	1.63251	1.61578		0	43.2296	42.7952	42.3575
16	1.25952	1.55897	1.90022		16	31.7738	40.8367	49.2472		1	1.61266	1.61594	1.75926		1	42.2752	42.3618	45.9723			1	1.51448	1.61036	1.79531		1	39.6063	42.2147	46.8342		1	1.60668	1.62946	1.60596		1	42.1174	42.7156	42.0984
										2	1.54784	1.60582	1.82079		2	40.5322	42.0948	47.433			2	1.37294	1.59663	1.80326		2	35.4374	41.8509	47.022		2	1.64937	1.615	1.60569		2	43.2317	42.3368	42.0912
0	1.61164	1.62027	1.60656		0	42.2485	42.4754	42.1142		4	1.50459	1.59854	1.83323		4	39.328	41.9017	47.7223			4	1.31202	1.5661	1.91971		4	33.5089	41.0305	49.6808		4	1.63982	1.61977	1.61953		4	42.9851	42.4621	42.4559
0.5	1.4867	1.65051	1.85239		0.5	38.8197	43.261	48.1641		8	1.50453	1.59812	1.83909		8	39.3262	41.8905	47.858			8	1.22509	1.57485	1.92683		8	30.5962	41.2674	49.8381		8	1.63046	1.60533	1.6266		8	42.7418	42.0817	42.641
1	1.32018	1.62585	1.89015		1	33.7723	42.6215	49.0214		16	1.49522	1.59872	1.83913		16	39.0627	41.9063	47.8589			16	1.22104	1.55005	1.92066		16	30.4555	40.5929	49.7019		16	1.62756	1.61332	1.61834		16	42.6662	42.2928	42.4247
2	1.17774	1.6263	1.94455		2	28.9212	42.6331	50.2272
4	1.1646	1.57217	1.98948		4	28.4446	41.195	51.1978		0	1.65389	1.65736	1.6518		0	43.3479	43.437	43.2943			0	1.64976	1.62845	1.60555		0	43.2417	42.6895	42.0876		0	1.63284	1.62032	1.61282		0	42.8038	42.4766	42.2794
8	1.15644	1.56931	1.96349		8	28.1459	41.1174	50.639		1	1.56064	1.63444	1.73812		1	40.8823	42.8454	45.4585			1	1.44703	1.59978	1.78508		1	37.6706	41.9345	46.5915		1	1.60319	1.63022	1.58741		1	42.025	42.7354	41.6049
16	1.15454	1.56721	1.97851		16	28.0761	41.0606	50.9627		2	1.49579	1.61391	1.7989		2	39.0787	42.3082	46.919			2	1.3925	1.62403	1.79166		2	36.0383	42.5738	46.7478		2	1.61279	1.61986	1.60323		2	42.2786	42.4645	42.0263
										4	1.48249	1.59231	1.80409		4	38.6993	41.7357	47.0415			4	1.35753	1.61205	1.81671		4	34.9579	42.2594	47.3378		4	1.64052	1.62032	1.61407		4	43.003	42.4766	42.3125
0	1.62982	1.60656	1.59786		0	42.7251	42.1142	41.8836		8	1.48158	1.58833	1.80864		8	38.6733	41.6293	47.1486			8	1.33371	1.59976	1.83001		8	34.2056	41.9342	47.6477		8	1.63453	1.64054	1.61692		8	42.8476	43.0037	42.3874
0.5	1.56311	1.57119	1.69192		0.5	40.9493	41.1685	44.3138		16	1.48086	1.58522	1.80903		16	38.6524	41.5462	47.1577			16	1.32301	1.58885	1.84109		16	33.8633	41.6433	47.904		16	1.62725	1.63106	1.61236		16	42.6579	42.7573	42.2675
1	1.32958	1.60818	1.88537		1	34.0738	42.1572	48.914
2	1.26415	1.59786	1.96264		2	31.9297	41.8836	50.6207		0	1.67236	1.6681	1.63197		0	43.8198	43.7115	42.781			0	1.61794	1.62206	1.5926		0	42.4141	42.5223	41.7435		0	1.61199	1.62103	1.62988		0	42.2576	42.4952	42.7266
4	1.22745	1.58301	1.98601		4	30.678	41.4867	51.1235		1	1.58282	1.64488	1.71723		1	41.4816	43.1159	44.9449			1	1.53333	1.62054	1.75269		1	40.1321	42.4823	45.8133		1	1.63255	1.61023	1.60734		1	42.7961	42.2113	42.1348
8	1.22079	1.59411	1.98654		8	30.4466	41.7837	51.135		2	1.54698	1.63627	1.77727		2	40.5087	42.8928	46.4052			2	1.41165	1.61914	1.78004		2	36.6187	42.4458	46.4712		2	1.62546	1.60986	1.62115		2	42.6112	42.2014	42.4985
16	1.21952	1.57078	1.98645		16	30.4023	41.1574	51.1331		4	1.54329	1.61853	1.78188		4	40.4072	42.4297	46.5151			4	1.36715	1.60816	1.8355		4	35.2578	42.1565	47.7748		4	1.60169	1.61235	1.61891		4	41.9854	42.2673	42.4398
										8	1.5248	1.61543	1.80637		8	39.8949	42.3484	47.0952			8	1.33997	1.59965	1.84623		8	34.4044	41.9311	48.0226		8	1.62357	1.62013	1.60715		8	42.5617	42.4716	42.1299
0	1.63069	1.60431	1.60656		0	42.7478	42.0547	42.1142		16	1.5239	1.61152	1.80676		16	39.8699	42.2452	47.1043			16	1.31644	1.59014	1.84153		16	33.6519	41.6778	47.9142		16	1.63544	1.62865	1.60973		16	42.8714	42.6945	42.198
0.5	1.5374	1.56548	1.75197		0.5	40.2445	41.0138	45.7958
1	1.31688	1.60533	1.94617		1	33.6659	42.0819	50.2626													0	1.63749	1.61298	1.74224
2	1.28288	1.59502	1.9469		2	32.5545	41.808	50.2786													1	1.49984	1.61685	1.79072
4	1.26977	1.5799	1.93127		4	32.1183	41.4032	49.936													2	1.48226	1.60285	1.85555
8	1.25453	1.57788	1.9681		8	31.6049	41.3491	50.7387													4	1.42962	1.60208	1.86576
16	1.25022	1.56383	1.96905		16	31.4588	40.9688	50.7591													8	1.36127	1.58387	1.86964
																					16	1.37505	1.57152	1.87165
0	1.61089	1.60066			0	42.2288	41.9579
1	1.48648	1.56359			1	38.8135	40.9623
2	1.3015	1.60122			2	33.1669	41.9728
4	1.1775	1.59256			4	28.9126	41.7425
8	1.16443	1.59621			8	28.4382	41.8397
16	1.1562	1.58549			16	28.1369	41.5533
0		1.59859			0		41.9031
0.5		1.56907			0.5		41.1111
1		1.59859			1		41.903
2		1.58971			2		41.6664
4		1.57574			4		41.2912
8		1.57529			8		41.2791
16		1.57529			16		41.2792

## Sheet: CAM124 RAW
Ratio (sum526-530/sum491-495)					Normalized					Percentage %
Free Ca2+ uM	0 uM pep	5 uM pep	10 uM pep		Free Ca2+ uM	0 uM pep	5 uM pep	10 uM pep		Free Ca2+ uM	0 uM pep	5 uM pep	10 uM pep		To normalize to CaM WT
0	1.6497	1.62439	1.66103		0	0.011379	-0.00414237	0.0183245		0	-3.89441	1.41771	-6.27149		1.63114
1	1.58545	1.5296	1.84493		1	-0.0280123	-0.0622511	0.131066		1	9.58713	21.3053	-44.8569		-0.292187
2	1.47196	1.65431	1.89516		2	-0.0975878	0.0142026	0.161861		2	33.3991	-4.8608	-55.3964
4	1.41004	1.6304	1.91379		4	-0.135552	-0.000453248	0.173284		4	46.3924	0.155123	-59.3061
8	1.39286	1.60801	1.92005		8	-0.146085	-0.0141815	0.17712		8	49.9973	4.85357	-60.6188
16	1.38005	1.58409	1.91942		16	-0.153939	-0.0288454	0.176735		16	52.6853	9.87224	-60.487
0	1.60596	1.6445	1.62435		0	-0.0154408	0.00818691	-0.00416217		0	5.28456	-2.80194	1.42449
1	1.49744	1.63118	1.78028		1	-0.0819678	2.03913e-05	0.0914312		1	28.0532	-0.00697887	-31.292
2	1.3472	1.62055	1.79606		2	-0.174078	-0.00649734	0.101107		2	59.5775	2.2237	-34.6035
4	1.31464	1.61788	1.8077		4	-0.194036	-0.00813176	0.108239		4	66.4083	2.78307	-37.0444
8	1.27516	1.6101	1.82016		8	-0.21824	-0.0129039	0.115881		8	74.6921	4.41631	-39.6599
16	1.27232	1.60965	1.83649		16	-0.219984	-0.0131761	0.125889		16	75.2889	4.50948	-43.085
0	1.57614	1.65684	1.67435		0	-0.0337193	0.0157547	0.0264887		0	11.5403	-5.39201	-9.06569
1	1.52769	1.66328	1.82746		1	-0.0634221	0.0196991	0.120356		1	21.706	-6.74196	-41.1914
2	1.38317	1.66047	1.89122		2	-0.152021	0.0179769	0.159444		2	52.0288	-6.15254	-54.5692
4	1.31896	1.66942	1.90115		4	-0.19139	0.0234652	0.165535		4	65.5025	-8.03091	-56.6539
8	1.25311	1.64141	1.91655		8	-0.231758	0.00629145	0.174976		8	79.3185	-2.15323	-59.8851
16	1.26648	1.64666	1.92467		16	-0.223561	0.00951509	0.179952		16	76.513	-3.25651	-61.5881
0	1.6055	1.62404	1.60915		0	-0.0157188	-0.00435604	-0.0134807		0	5.37972	1.49084	4.61373
1	1.51448	1.61036	1.79531		1	-0.0715252	-0.0127401	0.100644		1	24.4793	4.36027	-34.4451
2	1.37294	1.59663	1.80326		2	-0.158295	-0.0211571	0.105521		2	54.176	7.24094	-36.1141
4	1.31202	1.5661	1.91971		4	-0.195643	-0.0398759	0.17691		4	66.9584	13.6474	-60.5468
8	1.22509	1.57485	1.92683		8	-0.248936	-0.0345089	0.181273		8	85.1975	11.8106	-62.0401
16	1.22104	1.55005	1.92066		16	-0.251419	-0.0497132	0.177494		16	86.0474	17.0142	-60.7468
0	1.64976	1.62845	1.60555		0	0.0114124	-0.00164818	-0.01569		0	-3.90586	0.564083	5.36987
1	1.44703	1.59978	1.78508		1	-0.112875	-0.0192299	0.0943762		1	38.631	6.58138	-32.3
2	1.3925	1.62403	1.79166		2	-0.146307	-0.00436273	0.0984085		2	50.0731	1.49313	-33.68
4	1.35753	1.61205	1.81671		4	-0.167741	-0.0117024	0.113768		4	57.4087	4.00512	-38.9366
8	1.33371	1.59976	1.83001		8	-0.182346	-0.0192376	0.12192		8	62.4075	6.58403	-41.7268
16	1.32301	1.58885	1.84109		16	-0.188908	-0.0259299	0.128709		16	64.6531	8.87443	-44.0503
0	1.61794	1.62206	1.5926		0	-0.00809708	-0.00556873	-0.0236298		0	2.7712	1.90588	8.08724
1	1.53333	1.62054	1.75269		1	-0.059964	-0.0065032	0.074515		1	20.5225	2.2257	-25.5025
2	1.41165	1.61914	1.78004		2	-0.134567	-0.00735811	0.0912832		2	46.055	2.51829	-31.2414
4	1.36715	1.60816	1.8355		4	-0.161846	-0.0140929	0.125283		4	55.3914	4.82326	-42.8778
8	1.33997	1.59965	1.84623		8	-0.178512	-0.0193083	0.131864		8	61.0951	6.60819	-45.1299
16	1.31644	1.59014	1.84153		16	-0.192933	-0.0251374	0.128979		16	66.0306	8.60318	-44.1428
0	1.63749	1.61298	1.74224
1	1.49984	1.61685	1.79072
2	1.48226	1.60285	1.85555
4	1.42962	1.60208	1.86576
8	1.36127	1.58387	1.86964
16	1.37505	1.57152	1.87165

## Sheet: CAM124 STATISTIC
0 uM S2S3								5 uM S2S3									10 uM S2S3
Ca2+ uM	A	B	C	D	E	F		Ca2+ uM	A	B	C	D	E	F		Ca2+ uM	A	B	C	D	E	F
0	-3.89441	5.28456	11.5403	5.37972	-3.90586	2.7712		0	1.41771	-2.80194	-5.39201	1.49084	0.564083	1.90588		0	-6.27149	1.42449	-9.06569	4.61373	5.36987	8.08724
1	9.58713	28.0532	21.706	24.4793	38.631	20.5225		1	21.3053	-0.00697887	-6.74196	4.36027	6.58138	2.2257		1	-44.8569	-31.292	-41.1914	-34.4451	-32.3	-25.5025
2	33.3991	59.5775	52.0288	54.176	50.0731	46.055		2	-4.8608	2.2237	-6.15254	7.24094	1.49313	2.51829		2	-55.3964	-34.6035	-54.5692	-36.1141	-33.68	-31.2414
4	46.3924	66.4083	65.5025	66.9584	57.4087	55.3914		4	0.155123	2.78307	-8.03091	13.6474	4.00512	4.82326		4	-59.3061	-37.0444	-56.6539	-60.5468	-38.9366	-42.8778
8	49.9973	74.6921	79.3185	85.1975	62.4075	61.0951		8	4.85357	4.41631	-2.15323	11.8106	6.58403	6.60819		8	-60.6188	-39.6599	-59.8851	-62.0401	-41.7268	-45.1299
16	52.6853	75.2889	76.513	86.0474	64.6531	66.0306		16	9.87224	4.50948	-3.25651	17.0142	8.87443	8.60318		16	-60.487	-43.085	-61.5881	-60.7468	-44.0503	-44.1428
Ca2+ uM	Size	Missing	Mean	Std Dev	Std. Error	C.I. of Mean		Ca2+ uM	Size	Missing	Mean	Std Dev	Std. Error	C.I. of Mean		Ca2+ uM	Size	Missing	Mean	Std Dev	Std. Error	C.I. of Mean
0	6	0	2.863	5.983	2.443	6.279		0	6	0	-0.469	2.959	1.208	3.106		0	6	0	0.693	6.873	2.806	7.213
1	6	0	23.83	9.546	3.897	10.018		1	6	0	4.621	9.365	3.823	9.828		1	6	0	-34.931	7.029	2.869	7.376
2	6	0	49.218	8.953	3.655	9.396		2	6	0	0.41	5.028	2.053	5.277		2	6	0	-40.934	11	4.491	11.543
4	6	0	59.677	8.152	3.328	8.555		4	6	0	2.897	7.035	2.872	7.383		4	6	0	-49.228	10.766	4.395	11.298
8	6	0	68.785	13.176	5.379	13.827		8	6	0	5.353	4.522	1.846	4.746		8	6	0	-51.51	10.4	4.246	10.915
16	6	0	70.203	11.591	4.732	12.164		16	6	0	7.603	6.691	2.732	7.022		16	6	0	-52.35	9.425	3.848	9.891

## Sheet: CaM1234 RAW
Ratio (sum526-530/sum491-495)					Normalized					Percentage %
Free Ca2+ uM	0 uM pep	5 uM pep	10 uM pep		Free Ca2+ uM	0 uM pep	5 uM pep	10 uM pep		Free Ca2+ uM	0 uM pep	5 uM pep	10 uM pep		To normalize to CaM
0	1.62741	1.62741	1.61204		0	-0.00228752	-0.00228752	-0.0117122		0	0.782897	0.782897	4.00846		1.63114
1	1.64649	1.64649	1.62139		1	0.00940718	0.00940718	-0.00598056		1	-3.21958	-3.21958	2.04683		-0.292187
2	1.63803	1.63803	1.61422		2	0.00422189	0.00422189	-0.0103743		2	-1.44493	-1.44493	3.55056
4	1.61582	1.61582	1.62251		4	-0.00939135	-0.00939135	-0.00529394		4	3.21416	3.21416	1.81183
8	1.57115	1.60712	1.60935		8	-0.0367784	-0.0147308	-0.0133611		8	12.5873	5.04156	4.57279
16	1.64459	1.64459	1.6036		16	0.00824293	0.00824293	-0.0168874		16	-2.82112	-2.82112	5.77965
0	1.62276	1.62276	1.61663		0	-0.00514137	-0.00514137	-0.00889927		0	1.75962	1.75962	3.04575
1	1.63027	1.63422	1.63543		1	-0.000533038	0.00188327	0.00262771		1	0.182431	-0.644545	-0.899327
2	1.61913	1.63085	1.62709		2	-0.00736295	-0.000179083	-0.00248321		2	2.51995	0.0612905	0.849873
4	1.63698	1.6298	1.60521		4	0.00357664	-0.00082642	-0.0159012		4	-1.22409	0.28284	5.44215
8	1.61922	1.62084	1.5787		8	-0.00731242	-0.00631558	-0.0321527		8	2.50265	2.16149	11.0042
16	1.60946	1.61895	1.63356		16	-0.0132922	-0.00747433	0.00148016		16	4.54923	2.55807	-0.506579
0	1.64605	1.60165	1.60587		0	0.00913931	-0.0180837	-0.0154968		0	-3.1279	6.18908	5.30373
1	1.60233	1.59325	1.61061		1	-0.0176649	-0.023234	-0.0125853		1	6.04575	7.95178	4.30727
2	1.61742	1.61025	1.60697		2	-0.00841309	-0.0128119	-0.0148167		2	2.87935	4.38484	5.07099
4	1.64006	1.60986	1.59651		4	0.0054676	-0.0130502	-0.0212295		4	-1.87127	4.46639	7.26573
8	1.63528	1.6202	1.61114		8	0.00253831	-0.00670756	-0.012264		8	-0.868728	2.29564	4.19731
16	1.61602	1.63022	1.62119		16	-0.00927201	-0.000568708	-0.00610357		16	3.17332	0.194638	2.08893
0	1.64929	1.63251	1.61578		0	0.0111245	0.000839322	-0.00941713		0	-3.80734	-0.287256	3.22298
1	1.60668	1.62946	1.60596		1	-0.0150005	-0.00103405	-0.0154399		1	5.13386	0.353902	5.28427
2	1.64937	1.615	1.60569		2	0.011174	-0.00989934	-0.0156058		2	-3.82427	3.38802	5.34105
4	1.63982	1.61977	1.61953		4	0.00532144	-0.0069752	-0.00712187		4	-1.82125	2.38724	2.43744
8	1.63046	1.60533	1.6266		8	-0.000417842	-0.0158259	-0.00278641		8	0.143005	5.41635	0.953642
16	1.62756	1.61332	1.61834		16	-0.00219469	-0.010924	-0.0078501		16	0.751126	3.7387	2.68668
0	1.63284	1.62032	1.61282		0	0.00104189	-0.00663814	-0.011236		0	-0.356583	2.27188	3.8455
1	1.60319	1.63022	1.58741		1	-0.0171395	-0.000568677	-0.0268085		1	5.86594	0.194628	9.17515
2	1.61279	1.61986	1.60323		2	-0.0112543	-0.00691947	-0.0171097		2	3.85176	2.36817	5.85574
4	1.64052	1.62032	1.61407		4	0.00574628	-0.00663807	-0.0104663		4	-1.96665	2.27186	3.58206
8	1.63453	1.64054	1.61692		8	0.00207349	0.00576185	-0.0087204		8	-0.709644	-1.97198	2.98453
16	1.62725	1.63106	1.61236		16	-0.00238946	-5.39863e-05	-0.0115131		16	0.817785	0.0184767	3.94033
0	1.61199	1.62103	1.62988		0	-0.0117437	-0.00620289	-0.000774327		0	4.01924	2.12292	0.265011
1	1.63255	1.61023	1.60734		1	0.000859521	-0.0128197	-0.0145953		1	-0.294168	4.3875	4.99519
2	1.62546	1.60986	1.62115		2	-0.00348609	-0.01305	-0.00612573		2	1.1931	4.46631	2.09651
4	1.60169	1.61235	1.61891		4	-0.0180539	-0.0115187	-0.00749687		4	6.17891	3.94223	2.56578
8	1.62357	1.62013	1.60715		8	-0.00464553	-0.00675462	-0.0147089		8	1.58992	2.31175	5.03408
16	1.63544	1.62865	1.60973		16	0.00263578	-0.00152939	-0.0131287		16	-0.902089	0.523429	4.49326

## Sheet: CaM1234 STATISTIC
0 uM S2S3								5 uM S2S3								10 uM pep
Free Ca2+ uM	A	B	C	D	E	F		Free Ca2+ uM	A	B	C	D	E	F		Free Ca2+ uM	A	B	C	D	E	F
0	0.782897	1.75962	-3.1279	-3.80734	-0.356583	4.01924		0	0.782897	1.75962	6.18908	-0.287256	2.27188	2.12292		0	4.00846	3.04575	5.30373	3.22298	3.8455	0.265011
1	-3.21958	0.182431	6.04575	5.13386	5.86594	-0.294168		1	-3.21958	-0.644545	7.95178	0.353902	0.194628	4.3875		1	2.04683	-0.899327	4.30727	5.28427	9.17515	4.99519
2	-1.44493	2.51995	2.87935	-3.82427	3.85176	1.1931		2	-1.44493	0.0612905	4.38484	3.38802	2.36817	4.46631		2	3.55056	0.849873	5.07099	5.34105	5.85574	2.09651
4	3.21416	-1.22409	-1.87127	-1.82125	-1.96665	6.17891		4	3.21416	0.28284	4.46639	2.38724	2.27186	3.94223		4	1.81183	5.44215	7.26573	2.43744	3.58206	2.56578
8	12.5873	2.50265	-0.868728	0.143005	-0.709644	1.58992		8	5.04156	2.16149	2.29564	5.41635	-1.97198	2.31175		8	4.57279	11.0042	4.19731	0.953642	2.98453	5.03408
16	-2.82112	4.54923	3.17332	0.751126	0.817785	-0.902089		16	-2.82112	2.55807	0.194638	3.7387	0.0184767	0.523429		16	5.77965	-0.506579	2.08893	2.68668	3.94033	4.49326
0 uM S2S3								5 uM S2S3								10 uM pep
Free Ca2+ uM	Size	Missing	Mean	Std Dev	Std. Error	C.I. of Mean		Free Ca2+ uM	Size	Missing	Mean	Std Dev	Std. Error	C.I. of Mean		Free Ca2+ uM	Size	Missing	Mean	Std Dev	Std. Error	C.I. of Mean
0	6	0	-0.122	2.973	1.214	3.12		0	6	0	2.14	2.204	0.9	2.313		0	6	0	3.282	1.679	0.685	1.762
1	6	0	2.286	3.91	1.596	4.104		1	6	0	1.504	3.996	1.632	4.194		1	6	0	4.152	3.382	1.381	3.549
2	6	0	0.862	2.938	1.199	3.083		2	6	0	2.204	2.417	0.987	2.536		2	6	0	3.794	1.994	0.814	2.093
4	6	0	0.418	3.454	1.41	3.625		4	6	0	2.761	1.485	0.606	1.559		4	6	0	3.851	2.101	0.858	2.205
8	6	0	2.541	5.095	2.08	5.347		8	6	0	2.542	2.651	1.082	2.782		8	6	0	4.791	3.378	1.379	3.545
16	6	0	0.928	2.668	1.089	2.8		16	6	0	0.702	2.273	0.928	2.385		16	6	0	3.08	2.192	0.895	2.3
