# Supplementary material for: Redox regulation of KV7 channels through EF3 hand of calmodulin
Source: eLife. 2023 Feb 20;12:e81961. doi: 10.7554/eLife.81961 (PMC9988260; doi:10.7554/eLife.81961)
Supplement: Figure 6—figure supplement 1—source data 1. [file elife-81961-fig6-figsupp1-data1.xlsx]

## Sheet: Hoja1
											Q1 S2S3	Q1 S2S3 OX	Q2 S2S3	Q2 OX					FRET Ca2+	5 uM S2S3 Q1	5 uM Q1 S2S3 OX	5 uM Q2 S2S3	5 uM Q2 S2S3 OX	NORMALIZATION
5 uM S2S3	media incremento D-CaM	ERROR	Media incremento FRET	ERROR						D-CaM increase	188	6.21	165.45	5.14						1.5624	1.16522	1.64236	1.2122
DTT	188.7	5.6	1.9	0.9							201.54	8.74	178.541	7.85						1.60595	1.14201	1.62521	1.23655	Q1	Q2
H2O2	3.1	2.1	78	4.1							210.45	1.25	159.54	2.23						1.57604	1.19856	1.63221	1.25412	1.6219	1.63114
											174.98	2.47	168.11	9.5						1.62701	1.1874	1.60656	1.24854	-0.265152	-0.292187
											187.74	2.63	169.2	1.32						1.58541	1.2013	1.59859	1.26502
											169.65	1.85	181.33	3.45						1.56527	1.21521	1.64251	1.20152
											201.1	4.14	170.68	5.65						1.60825	1.2201	1.5988	1.19856
											193.2	5.21	155.04	2.32
											191.4	2.98	169.2	4.23
											180.47	3.05	175.77	3.77						-0.0366848	-0.281571	0.00687664	-0.25684
											187.1	3.6	180.27	3.65						-0.00983599	-0.295881	-0.00363745	-0.241912
											195.42	3.8	160.41	4.1						-0.0282724	-0.261015	0.000654014	-0.23114
,											179.22	2.74	155.98	3.2						0.00315211	-0.267896	-0.0150712	-0.234561
											191.36	3.1								-0.0224983	-0.259325	-0.0199573	-0.224458
											178.85	3.2								-0.0349186	-0.250749	0.0069686	-0.263388
											191.2	2.44								-0.00841544	-0.247734	-0.0198286	-0.265202
											187.4	3.3
																				13.8354	106.192	-2.35351	87.9028
											D-CaM									3.70957	111.589	1.24491	82.7937
											Column	Size	Missing	Mean	Std Dev	Std. Error	C.I. of Mean			10.6627	98.4397	-0.223834	79.1071
											Q1	17	0	188.769	10.275	2.492	5.283			-1.18879	101.035	5.15806	80.2779
											Q1 OXI	17	0	3.571	1.772	0.43	0.911			8.48506	97.8026	6.83033	76.8201
											Q2	13	0	168.425	8.924	2.475	5.393			13.1693	94.5681	-2.38498	90.1437
											Q2 OXI	13	0	4.339	2.272	0.63	1.373			3.17382	93.431	6.78626	90.7648
											FRET INCREASE
											Column	Size	Missing	Mean	Std Dev	Std. Error	C.I. of Mean
											Q1 S2S3	7	0	7.4	8.093	3.059	7.485
											Q1 OXI	7	0	100.437	6.485	2.451	5.997
											Q2 S2S3	7	0	2.151	4.077	1.541	3.771
											Q2 OXI	7	0	83.973	5.62	2.124	5.198
