# Supplementary material for: Redox regulation of KV7 channels through EF3 hand of calmodulin
Source: eLife. 2023 Feb 20;12:e81961. doi: 10.7554/eLife.81961 (PMC9988260; doi:10.7554/eLife.81961)
Supplement: Figure 6—figure supplement 2—source data 1. [file elife-81961-fig6-figsupp2-data1.xlsx]

## Sheet: Hoja1
		FRET-RATIO (sum526-530nm/sum491-495nm)																CONTROL
EGTA	Ca	EGTA+S2S3	CA+S2S3	EGTA S2S3 OX	CA OX S2S3	DTT Q2	DTT Q2 CA	q2	Q4 EGTA	Q4 CA	EGTA+S2S3	CA+S2S3	EGTA S2S3 OX	CA OX S2S3	DTT Q4	DTT Q4 Ca		sensor Q2 + H2O2	H2O2 + Ca	Sensor Q2 + DTT	DTT+ Ca		sensor Q4 + H2O2	H2O2 + Ca	sensor Q4 + DTT	DTT + Ca
1.7132	1.2295	1.7267	2.1986	1.5689	1.274	1.6651	1.79875	1.7132	1.6143	1.1508	1.6441	1.9052	1.6125	1.2548	1.663	1.84745		1.75186	1.19855	1.75276	1.21452		1.56066	1.16584	1.56059	1.14655
1.715	1.2326	1.709	2.1267	1.5176	1.2445	1.6851	1.81546	-0.288904	1.5724	1.1187	1.6117	1.9655	1.6023	1.2897	1.6746	1.89523		1.70007	1.20215	1.71746	1.22545		1.60161	1.15425	1.59605	1.16525
1.7123	1.207	1.7276	1.9114	1.6075	1.2422	1.6855	1.85475	q4	1.594	1.1321	1.6235	1.9646	1.6253	1.2987	1.6846	1.81254		1.68966	1.18759	1.68553	1.20464		1.61576	1.17896	1.56251	1.14785
1.7128	1.2316	1.715	2.0446	1.5812	1.2166	1.6776	1.83256	1.42046	1.5897	1.1653	1.6725	1.9685	1.5877	1.2125	1.6791	1.83565		1.65818	1.21451	1.67529	1.18752		1.56441	1.13202	1.59647	1.18755
1.7151	1.1511	1.7322	2.1545	1.6125	1.2354	1.6832	1.82556	-0.199269	1.5922	1.1532	1.6351	1.9705	1.5904	1.2254	1.6845	1.8478		1.74945	1.20046	1.67571	1.17956		1.5865	1.14526	1.58648	1.12322
	1.1819	1.7095	2.0618	1.5674	1.2401	1.6676	1.84517		1.5827	1.1437	1.6269	1.9331	1.5935	1.2528	1.6655	1.83201		1.69829	1.1879	1.75116	1.21355		1.60456	1.18745	1.57617	1.15413
	1.1727																	1.68792	1.19866	1.71607	1.24526		1.60471	1.15987	1.60514	1.13204
									1.59095	-0.27889								1.65635	1.20556	1.68429	1.18752		1.63094	1.14021	1.56512	1.19856
																		1.65341	1.22582	1.67395	1.19766		1.61532	1.16485	1.56347	1.15478
																				1.67452	1.23846		1.64825	1.13254	1.60448	1.14541
																				1.66691	1.22457		1.60466	1.17059	1.56142	1.14521
																							1.64433	1.12353	1.56279
																							1.62948		1.55627
																							1.62806
																							1.56618
		EFFCIENCY	42.49*(LN(RATIO))+21.297
		EGTA+S2S3	CA+S2S3	EGTA S2S3 OX	CA OX S2S3	DTT Q2			Q4 EGTA	Q4 CA	EGTA+S2S3	CA+S2S3	EGTA S2S3 OX	CA OX S2S3	DTT Q4
		44.5056	54.7715	40.4334	31.5864	42.962			41.6455	27.265	42.4227	48.6855	41.5981	30.9412	42.9084
		44.0677	53.3587	39.0209	30.591	43.4693			40.5281	26.063	41.577	50.0095	41.3285	32.1069	43.2038
		44.5277	48.8235	41.4662	30.5124	43.4794			41.1078	26.5689	41.887	49.99	41.9341	32.4023	43.4567
		44.2167	51.6859	40.7652	29.6276	43.2798			40.993	27.7971	43.1504	50.0743	40.9396	29.4842	43.3178
		44.6407	53.9106	41.5981	30.2792	43.4214			41.0598	27.3536	42.1895	50.1174	41.0117	29.9338	43.4542
		44.0802	52.0419	40.3928	30.4405	43.0258			40.8055	27.0021	41.9759	49.3032	41.0945	30.8734	42.9722
		STATISTIC
		Column	Size	Missing	Mean	Std Dev		Std. Error	C.I. of Mean									45.1203		45.1421			40.2096		40.2077
		EGTA+S2S3	6	0	44.34	0.249		0.102	0.261									43.8452		44.2775			41.3101		41.1623
		CA+S2S3	6	0	52.432	2.109		0.861	2.214									43.584		43.4802			41.684		40.2601
		EGTA S2S3 OX	6	0	40.613	0.931		0.38	0.977									42.7851		43.2213			40.3116		41.1735
		CA OX S2S3	6	0	30.506	0.633		0.258	0.664									45.0618		43.232			40.9074		40.9069
		DTT Q2	6	0	43.273	0.229		0.0933	0.24									43.8007		45.1031			41.3883		40.63
																		43.5404		44.2431			41.3925		41.4037
		Q4 EGTA	6	0	41.023	0.371		0.152	0.39									42.7382		43.4488			42.0814		40.3308
		Q4 CA	6	0	27.008	0.615		0.251	0.646									42.6626		43.1874			41.6723		40.286
		EGTA+S2S3	6	0	42.2	0.546		0.223	0.573											43.2017			42.5298		41.3863
		CA+S2S3	6	0	49.697	0.58		0.237	0.608											43.0083			41.3911		40.2305
		EGTA S2S3 OX	6	0	41.318	0.386		0.158	0.405														42.4286		40.2676
		CA OX S2S3	6	0	30.957	1.152		0.47	1.209														42.0432		40.0899
		DTT Q4	6	0	43.219	0.236		0.0965	0.248														42.0062
																							40.3598
																		Column		Size	Missing		Mean		Std Dev	Std. Error	C.I. of Mean
																		Q2 + H2O2		9	0		43.682		0.92	0.307	0.707
																		Q2+DTT		11	0		43.777		0.785	0.237	0.527
																		Q4 + DTT		15	0		42.55		0.274	0.0708	0.152
																		Q4 + H2O2		13	0		42.461		0.237	0.0656	0.143
		=
0	-0.282337	0.00787999	0.283329	-0.0842283	-0.256362	-0.0280761	0.0499329		0.0146768	-0.276659	0.0334077	0.197523	0.0135454	-0.211289	0.0452874	0.161224		0.0225686	-0.3004	0.0230932	-0.29108		-0.0190401	-0.267205	-0.0190839	-0.279329
0.00105067	-0.280528	-0.00245155	0.241361	-0.114172	-0.273582	-0.0164021	0.0596871		-0.0116597	-0.296835	0.0130425	0.235425	0.0071341	-0.189352	0.0525786	0.191258		-0.00766257	-0.298304	0.00248478	-0.2847		0.00669849	-0.274488	0.0032026	-0.267573
-0.000525333	-0.29547	0.00840532	0.11569	-0.0616974	-0.274924	-0.0161686	0.0826258		0.00191709	-0.288413	0.0204595	0.23486	0.0215909	-0.183695	0.0588642	0.139282		-0.0137432	-0.306799	-0.0161509	-0.296848		0.015595	-0.258962	-0.0178748	-0.278513
-0.000233481	-0.281111	0.00105067	0.193439	-0.0770488	-0.289867	-0.0207798	0.0696708		-0.000785694	-0.267545	0.0512587	0.237311	-0.0020428	-0.237877	0.0554071	0.153809		-0.0321137	-0.291084	-0.0221276	-0.306844		-0.0166828	-0.288462	0.00346819	-0.253559
0.00110904	-0.328099	0.0110904	0.257588	-0.0587789	-0.278893	-0.0175111	0.0655849		0.000785694	-0.27515	0.0277507	0.238568	-0.000345705	-0.229768	0.0588013	0.161444		0.0211616	-0.29929	-0.0218802	-0.311487		-0.0027973	-0.280143	-0.00280836	-0.293991
	-0.310121	-0.0021597	0.203479	-0.0851039	-0.27615	-0.0266169	0.0770284		-0.00518558	-0.281121	0.0225966	0.21506	0.00160282	-0.212546	0.0468588	0.15152		-0.00870191	-0.306622	0.0221552	-0.291647		0.0085528	-0.253621	-0.0092871	-0.274569
	-0.315491																	-0.014756	-0.300336	0.00167426	-0.273137		0.00865135	-0.27096	0.00891785	-0.288447
																		-0.0331816	-0.296311	-0.0168776	-0.306839		0.0251388	-0.283315	-0.0162375	-0.246639
0	97.727	-2.72755	-98.0705	29.1545	88.7362	9.71815	-17.2836		-5.26256	99.1999	-11.9788	-70.8249	-4.85689	75.7606	-16.2384	-57.8093		-0.0349007	-0.284487	-0.0229076	-0.300922		0.0153173	-0.267824	-0.0172751	-0.274157
-0.363673	97.1007	0.848571	-83.5438	39.5191	94.6964	5.67734	-20.6599		4.18075	106.435	-4.67658	-84.4151	-2.55803	67.895	-18.8528	-68.5783				-0.022577	-0.277107		0.0360156	-0.288138	0.00850416	-0.280047
0.181837	102.273	-2.90938	-40.0444	21.3557	95.1611	5.59652	-28.5998		-0.687401	103.414	-7.33604	-84.2123	-7.74172	65.8666	-21.1066	-49.9416				-0.0270169	-0.285217		0.00861918	-0.264221	-0.0185584	-0.280172
0.0808162	97.3028	-0.363673	-66.9563	26.6694	100.333	7.19265	-24.1156		0.281722	95.9319	-18.3795	-85.0913	0.732477	85.2941	-19.867	-55.1503							0.0335504	-0.293798	-0.0176999
-0.383877	113.567	-3.83877	-89.1605	20.3455	96.535	6.06122	-22.7013		-0.281722	98.659	-9.95042	-85.542	0.123958	82.3867	-21.0841	-57.8882		-7.81179	103.979	-7.99339	100.753		0.0242186		-0.0218006
	107.344	0.74755	-70.4314	29.4575	95.5854	9.21305	-26.6623		1.85936	100.8	-8.10232	-77.1129	-0.574713	76.2114	-16.8019	-54.3295		2.65229	103.254	-0.86007	98.5451		0.0233274
	109.203																	4.75701	106.194	5.59039	102.75		-0.0155675
																		11.1157	100.755	7.65914	106.21
97.727		-95.343		59.5818		-27.0017			104.462		-58.8461		80.6175		-41.5709			-7.32478	103.595	7.57351	107.817
97.4644		-84.3924		55.1773		-26.3372			102.254		-79.7386		70.453		-49.7255			3.01204	106.133	-7.66872	100.95		6.82711	95.8102	6.84282	100.157
102.091		-37.1351		73.8054		-34.1963			104.102		-76.8763		73.6083		-28.835			5.10758	103.957	-0.579522	94.5425		-2.40184	98.4214	-1.14834	95.9423
97.2219		-66.5926		73.664		-31.3082			95.6502		-66.7117		84.5616		-35.2833			11.4854	102.564	5.84194	106.208		-5.5918	92.8544	6.40928	99.8648
113.951		-85.3217		76.1895		-28.7625			98.9407		-75.5916		82.2628		-36.8041			12.0804	98.4713	7.92916	104.16		5.98186	103.432	-1.24357	90.9171
107.344		-71.1789		66.1279		-35.8754			98.9407		-69.0106		76.7861		-37.5276					7.81472	95.9168		1.00301	100.449	1.00698	105.415
																				9.35151	98.724		-3.06673	90.9394	3.33002	98.4505
																							-3.10207	97.1566	-3.19762	103.427
Column	Size	Missing	Mean	Std Dev	Std. Error	C.I. of Mean																	-9.01389	101.587	5.82219	88.4359
kcnq2 ca	6	0	102.633	6.792	2.773	7.128																	-5.49223	96.0322	6.19425	98.3029
q2 s2s3	6	0	-73.327	20.547	8.388	21.562																	-12.9139	103.316	-3.04929	100.415
q2 h2o2	6	0	67.424	8.598	3.51	9.023		100.725	1.412	-71.129	3.172	78.048	2.204	-38.291	2.845	-7.298	1.322	-6.762		1.462			-3.09053	94.7402	6.65437	100.46	-3.09053	6.65437
q2 dtt	6	0	-30.58	3.892	1.589	4.085																	-12.03	105.346	6.34656
q4 ca	6	0	100.725	3.459	1.412	3.63																	-8.68394		7.81691
q4 s2s3	6	0	-71.129	7.771	3.172	8.155																	-8.36438
q4 h2o2	6	0	78.048	5.4	2.204	5.667																	5.58195
q4 dtt	6	0	-38.291	6.968	2.845	7.312
q2 h2o2 solo	9	0	3.897	7.452	2.484	5.728
q2 dtt solo	11	0	3.151	6.383	1.924	4.288												111.791		108.747			88.9831		93.3145
q4 h2o2 solo	15	0	-7.298	5.122	1.322	2.836												100.602		99.4051			100.823		97.0906
q4 dtt solo	13	0	-6.762	5.271	1.462	3.185												101.437		97.1594			98.4462		93.4555
									Column	Size	Missing	Mean	Std Dev	Std. Error	C.I. of Mean			89.6391		98.5506			97.4504		92.1606
									Col 1	6	0	0.015	3.139	1.281	3.294			110.92		100.243			99.4462		104.408
									Col 2	7	0	101.949	4.669	1.765	4.318			103.121		108.618			94.0061		95.1205
0	97.727	-2.7275	-98.0705	29.1545	88.7362	9.7182	-17.2836		Col 3	6	0	-10.071	4.757	1.942	4.992			98.8496		95.122			100.259		106.624
-0.3637	97.1007	0.8486	-83.5438	39.5191	94.6964	5.6773	-20.6599		Col 4	6	0	-81.2	5.962	2.434	6.257			91.0785		100.366			110.601		82.6137
0.1818	102.273	-2.9094	-40.0444	21.3557	95.1611	5.5965	-28.5998		Col 5	6	0	-2.479	3.289	1.343	3.451			86.3909		96.2309			101.524		92.1087
0.0808	97.3028	-0.3637	-66.9563	26.6694	100.333	7.1926	-24.1156		Col 6	6	0	75.569	7.675	3.133	8.055								116.23		103.464
-0.3839	113.567	-3.8388	-89.1605	20.3455	96.535	6.0612	-22.7013		Col 7	6	0	-18.992	2.098	0.857	2.202								97.8308		93.8054
	107.344	0.7476	-70.4314	29.4575	95.5854	9.2131	-26.6623		Col 8	6	0	-57.283	6.251	2.552	6.56								117.375
	109.203																						8.68394
																				Size	Missing		Mean		Std Dev	Std. Error	C.I. of Mean
																		Col 1		9	0		3.897		7.452	2.484	5.728
																		Col 2		11	0		3.151		6.383	1.924	4.288
																		Col 3		15	0		-7.298		5.122	1.322	2.836
																		Col 4		13	0		-6.762		5.271	1.462	3.185
