# Supplementary material for: Redox regulation of KV7 channels through EF3 hand of calmodulin
Source: eLife. 2023 Feb 20;12:e81961. doi: 10.7554/eLife.81961 (PMC9988260; doi:10.7554/eLife.81961)
Supplement: Figure 6—source data 1. [file elife-81961-fig6-data1.xlsx]

## Sheet: Hoja1
FRET-RATIO (sum526-530nm/sum491-495nm)
EGTA+S2S3	CA+S2S3	EGTA S2S3 OX	CA OX S2S3	DTT Q2		Q4 EGTA	Q4 CA	EGTA+S2S3	CA+S2S3	EGTA S2S3 OX	CA OX S2S3	DTT Q4
1.7267	2.1986	1.5689	1.274	1.6651		1.6143	1.1508	1.6441	1.9052	1.6125	1.2548	1.663
1.709	2.1267	1.5176	1.2445	1.6851		1.5724	1.1187	1.6117	1.9655	1.6023	1.2897	1.6746
1.7276	1.9114	1.6075	1.2422	1.6855		1.594	1.1321	1.6235	1.9646	1.6253	1.2987	1.6846
1.715	2.0446	1.5812	1.2166	1.6776		1.5897	1.1653	1.6725	1.9685	1.5877	1.2125	1.6791
1.7322	2.1545	1.6125	1.2354	1.6832		1.5922	1.1532	1.6351	1.9705	1.5904	1.2254	1.6845
1.7095	2.0618	1.5674	1.2401	1.6676		1.5827	1.1437	1.6269	1.9331	1.5935	1.2528	1.6655
EFFCIENCY	42.49*(LN(RATIO))+21.297
EGTA+S2S3	CA+S2S3	EGTA S2S3 OX	CA OX S2S3	DTT Q2		Q4 EGTA	Q4 CA	EGTA+S2S3	CA+S2S3	EGTA S2S3 OX	CA OX S2S3	DTT Q4
44.5056	54.7715	40.4334	31.5864	42.962		41.6455	27.265	42.4227	48.6855	41.5981	30.9412	42.9084
44.0677	53.3587	39.0209	30.591	43.4693		40.5281	26.063	41.577	50.0095	41.3285	32.1069	43.2038
44.5277	48.8235	41.4662	30.5124	43.4794		41.1078	26.5689	41.887	49.99	41.9341	32.4023	43.4567
44.2167	51.6859	40.7652	29.6276	43.2798		40.993	27.7971	43.1504	50.0743	40.9396	29.4842	43.3178
44.6407	53.9106	41.5981	30.2792	43.4214		41.0598	27.3536	42.1895	50.1174	41.0117	29.9338	43.4542
44.0802	52.0419	40.3928	30.4405	43.0258		40.8055	27.0021	41.9759	49.3032	41.0945	30.8734	42.9722
STATISTIC
Column	Size	Missing	Mean	Std Dev	Std. Error	C.I. of Mean
EGTA+S2S3	6	0	44.34	0.249	0.102	0.261
CA+S2S3	6	0	52.432	2.109	0.861	2.214
EGTA S2S3 OX	6	0	40.613	0.931	0.38	0.977
CA OX S2S3	6	0	30.506	0.633	0.258	0.664
DTT Q2	6	0	43.273	0.229	0.0933	0.24
Q4 EGTA	6	0	41.023	0.371	0.152	0.39
Q4 CA	6	0	27.008	0.615	0.251	0.646
EGTA+S2S3	6	0	42.2	0.546	0.223	0.573
CA+S2S3	6	0	49.697	0.58	0.237	0.608
EGTA S2S3 OX	6	0	41.318	0.386	0.158	0.405
CA OX S2S3	6	0	30.957	1.152	0.47	1.209
DTT Q4	6	0	43.219	0.236	0.0965	0.248
